# Supplementary material for: Self-assembly-assisted dynamic placement of noble metals selectively on multifunctional carbide supports for alkaline hydrogen electrocatalysis
Source: Royal Society of Chemistry journal article supplement (doi:10.1039/d4ee04660a), 2024-12-09
Supplement: d4ee04660a1.pdf [file d4ee04660a1.pdf]

## **Supplementary Information to**

### **Self-Assembly-Assisted Dynamic Placement of Noble Metals Selectively on Multifunctional Carbide Supports for Alkaline Hydrogen Electrocatalysis**

Seongbeen Kim,<sup>a,†</sup> Seung-Jae Shin,<sup>c,†</sup> Hoyoung Kim,<sup>a,h,†</sup> Bupmo Kim,<sup>d</sup> Namgyu Noh,<sup>e</sup> Kug-Seung Lee,<sup>f</sup> Jinkyu Park,<sup>a</sup> Hyunwoo Jun,<sup>a</sup> Jiwon Kim,<sup>a</sup> Jaeho Byeon,<sup>a</sup> Seonggyu Lee,<sup>g</sup> Huawei Huang,<sup>a</sup> Sunghyun Noh,<sup>d</sup> Han Beom Jeong,<sup>e</sup> Jong Hyun Jang,<sup>h</sup> Jong Min Yuk,<sup>e</sup> Wooyul Kim,<sup>d</sup> Hyungjun Kim,<sup>\*b</sup> and Jinwoo Lee<sup>\*a</sup>

<sup>a</sup>Department of Chemical and Biomolecular Engineering, Korea Advanced Institute of Science and Technology (KAIST), Daejeon 34141, Republic of Korea. E-mail: [jwlee1@kaist.ac.kr](mailto:jwlee1@kaist.ac.kr).

<sup>b</sup>School of Energy and Chemical Engineering, Ulsan National Institute of Science and Technology (UNIST), Ulsan 44919, Korea

<sup>c</sup>Center for Hydrogen and Fuel Cells, Korea Institute of Science and Technology (KIST); Seoul 02792, Korea

<sup>d</sup>Department of Energy Engineering, Korea Institute of Energy Technology (KENTECH), Naju 58330, Korea.

<sup>e</sup>Department of Materials Science and Engineering, Korea Advanced Institute of Science and Technology (KAIST), Daejeon 34141, Korea.

<sup>f</sup>Pohang Accelerator Laboratory; Pohang 37673, Korea.

<sup>g</sup>Department of Chemical Engineering/Department of Energy Engineering Convergence, Kumoh National Institute of Technology (KIT), Gumi 39177, Korea.

<sup>h</sup>Department of Chemistry, Korea Advanced Institute of Science and Technology (KAIST), Daejeon 34141, Republic of Korea. Email: [linus16@kaist.ac.kr](mailto:linus16@kaist.ac.kr)

† These authors contributed equally to this work.

Correspondence to: [linus16@kaist.ac.kr](mailto:linus16@kaist.ac.kr) (H.K.); [jwlee1@kaist.ac.kr](mailto:jwlee1@kaist.ac.kr) (J.L.)

#### **This PDF file includes:**

Supplementary Notes 1 to 9  
Supplementary Figures 1 to 84  
Supplementary Tables 1 to 17  
Captions for Supplementary Movies 1 to 4  
Supplementary References

#### **Other Supplementary Materials for this manuscript include the following:**

Supplementary Movies 1 to 4

## Supplementary Notes

### **Note S1. Design of heterostructured supports to inhibit NM nanoparticle (NP) sintering.<sup>1</sup>**

Theoretical calculations suggested that the dominance of the sintering mechanisms above the Tammann temperature  $T$  ( $T_{\text{tam}}$ ) is affected by the metal-support interaction (MSI): strong MSI favors the Ostwald mechanism involving the formation and diffusion of metal atoms, while weak MSI favors the particle migration and coalescence (PMC) mechanism.<sup>1</sup>

The proposed heterostructured supports consist of two chemical species: one with strong MSI and the other with weak MSI. The surface of heterostructured supports comprises small areas of the first support surrounded by large areas of the second support. NM NPs are selectively loaded and covered onto the first support regions. Above  $T_{\text{tam}}$  of NM ( $T_{\text{tam-NM}}$ ), the NM NPs on the first support favor the Ostwald mechanism. However, the surface of the first support is unavailable due to NM nanoparticles (NPs) covering all small regions of the first support through strong MSI. In addition, the PMC mechanism is inhibited by the preference of the Ostwald mechanism on the first support with strong MSI. In the surrounding area, the surfaces of the second support remained available for NM NP sintering. However, the second support favors the PMC mechanism, which limits the Ostwald mechanism involving atomic detachment on its surface. In other words, NM NPs on designed heterostructured supports can successfully prevent NM NP from sintering above the  $T_{\text{tam-NM}}$ .

### **Note S2. Synthesis approaches for NM atomically dispersed catalysts (ADCs). Kinetic approach and thermodynamic approach for stabilizing the atom-dimension structure of NM ADCs (Fig. S1a).<sup>2</sup>**

The development of a synthesis route for NM ADCs is one of the main challenges because the high surface energy of NM ADCs makes it difficult to retain atom-dimension structures during synthesis or catalysis. Two main directions were applied to prevent the sintering of NM ADCs: a kinetic or a thermodynamic approach. The main difference between them is whether NM ADCs have thermodynamically favorable structures compared to the agglomerated form. When NM agglomerates are thermodynamically favorable, the kinetic approach is applied. First, NM precursors are atomically loaded on the support (for the atomic loading of NM precursors, a low loading of NM is required). Since the sintering of NM species is thermodynamically favorable, it is important not to exceed the activation barrier that enables thermal migration of atomically dispersed NM species. To not exceed the activation barrier, the synthesis conditions ( $T$  and the gas atmosphere for thermal treatment) are restricted, or physical barriers are applied. However, the catalysis of NM ADCs under oxidizing or reducing conditions can trigger the exceeding of the activation barrier, which limits catalyst stability by sintering.

On the other hand, the thermodynamic approach is applied when the NM ADCs are thermodynamically more favorable than the agglomerated form. During the thermal decomposition of NM precursors, NM agglomerates form at the beginning. The key difference between the thermodynamic approach and the kinetic approach is the support with a strong

affinity for NM, which stabilizes the atom-dimension structure of NM on the support. Compared to the activation barrier for the sintering of NMs in the kinetic approach, the value of the activation barrier enabling the formation of strong MSI and disintegration of NM NPs is high. Therefore, when the  $T$  reaches a certain point (above  $T_{\text{tam-NM}}$ ) that lets it exceed the activation barrier, NM agglomerates spontaneously disintegrate and atomically disperse on the support by forming SMSI. Since the NM ADCs from the thermodynamic approach have a more favorable structure than NM agglomerates, they can feature higher stability than the NM ADCs from the kinetic approach during the catalysis. However,  $T_{\text{tam-NM}}$  strongly depends on the size of the NM NPs.<sup>1</sup> Consequently, if the size of the NM NPs exceeds a critical point, the disintegration of large NM agglomerates is inhibited due to the higher activation barrier than the NM NPs. Therefore, the additional strategy to reduce NM NP size and disperse NM NP homogeneously is required to apply the thermodynamic approach.

**Note S3. Dynamic placement mechanism.** The mechanism for dynamic placement of NM selectively on  $\text{Mo}_x\text{C}$  surfaces involves the PMC mechanism and the Ostwald mechanism.<sup>1,3</sup>

We chose the  $T$  of 1,373 K for the dynamic placement of NM for the following reasons: 1) The NM begins to be mobile for  $T_{\text{tam-NM}}$  ( $\sim T_m/2$ , where  $T_m$  denotes the bulk melting point [K]). 2) NM NPs have a lower  $T_{\text{tam-NM}}$  than bulk NM,<sup>1</sup> because NM NPs have a lower melting point than bulk NM.<sup>4</sup>

The sintering of NM NPs occurs through the migration of mobile NM species under high  $T$ . Two mechanisms have been proposed to explain this phenomenon (Fig. S1b);<sup>1,3</sup> 1) Entire particles migrate on the support, collide, and coalesce. This mechanism is known as the PMC mechanism. 2) Atomic species separate from smaller particles, diffuse on the support surface and coalesce into larger particles. This mechanism is known as the Ostwald mechanism (atomic migration). Which of the two mechanisms is favored is determined by the free energy of the catalyst system.<sup>1,3</sup> The Ostwald mechanism is generally preferred when the affinity of the support for NM is sufficiently strong or the energy barrier to atomic detachment is low enough. The properties of the support are considered pivotal factors because they directly affect the free energy of atomic detachment and the diffusion of monomers on the support. In our catalyst system, most of the environmental factors near NM NPs are similar except for the type of support ( $\text{Mo}_x\text{C}$  or carbon surface) where NM NPs are located. Hence, we can conclude that the most critical factor is the MSI between NM and support.

We propose a synthesis mechanism for the dynamic placement of NM selectively on  $\text{Mo}_x\text{C}$  at a sufficiently high  $T$  based on different migration behaviors with different types of support (Fig. S1). We would apply theoretical expectation in reverse.<sup>1</sup> The theoretical calculation suggests that the designed heterostructured supports can effectively inhibit NM NP sintering even at  $T$  exceeding  $T_{\text{tam-NM}}$  (Note S1). This is because the PMC mechanism is inhibited in the first support region with strong MSI, where the NM NPs are loaded, and the Ostwald mechanism is inhibited in the second support region with weak MSI, which surrounds the first support region. In contrast, our objective was to induce the PMC mechanism in the second support region and the Ostwald mechanism in the first support region. This approach aimed to selectively load

NM ADCs onto the first support regions of heterostructured support by elevating  $T$  above  $T_{\text{tam-NM}}$ . At  $T > T_{\text{tam-NM}}$ , NM NPs in the second support regions would migrate across the support surface via the PMC mechanism, eventually reaching the first support regions. NM NPs in the first support regions would be disintegrated into NM ADCs via the Ostwald mechanism on the support surface. Consequently, NM NPs spontaneously disintegrated, and the NM ADCs selectively loaded in the first support region, which is thermodynamically favorable.

From our experimental design, evaporation-induced self-assembly (EISA) enables the preparation of sufficiently small NM NPs uniformly dispersed on heterostructured  $\text{Mo}_x\text{C}$ -C nanocomposite supports.<sup>5</sup> Prior to the final carburization process at 1,373 K, NM NPs (~5 nm size) were uniformly distributed on mesoporous  $\text{Mo}_x\text{C}$ -C nanocomposite. The  $\text{Mo}_x\text{C}$  has a similar or even greater affinity for NM than between NMs, but carbon does not. Thus, NM NPs exhibit different migration behaviors depending on their location on the support. When NM NPs are located on a carbon surface, the weak affinity of carbon for NM makes the PMC mechanism more favorable than the Ostwald mechanism.

Consequently, on carbon the NM NPs migrate via the Brownian motion of whole particles and then reach the  $\text{Mo}_x\text{C}$  surface. When NM NPs are located on the  $\text{Mo}_x\text{C}$  surface, the strong affinity of  $\text{Mo}_x\text{C}$  for NM makes the Ostwald mechanism more favorable than the PMC mechanism. Consequently, atomic species of NM separate from NM NPs, diffuse on the  $\text{Mo}_x\text{C}$  surface, and become trapped on anchoring sites of  $\text{Mo}_x\text{C}$ . To summarize, the PMC mechanism enables the migration of NM NPs from carbon to the  $\text{Mo}_x\text{C}$  surface. Then the Ostwald mechanism enables the disintegration of NM NPs to NM ADCs on the  $\text{Mo}_x\text{C}$  surface. Subsequently, the NM is dynamically and selectively placed on the  $\text{Mo}_x\text{C}$  surface.

**Note S4. Synthesis strategy.** The method to synthesize aNM/ $\text{Mo}_x\text{C}$  is assisted by interaction mediator assisted EISA (IM-EISA),<sup>5</sup> and the design strategy for mesoporous heterostructured  $\text{Mo}_x\text{C}$ -C nanocomposite.

To realize the dynamic placement of NM, several requirements should be satisfied: 1) The NM NPs should be small enough that they have sufficiently low  $T_{\text{tam-NM}}$  and be homogeneously distributed on support surfaces with sufficient spatial spacing to prevent a further increase in particle size via the PMC mechanism. 2) The density of the anchoring site for NM ADCs should be high enough that numerous NMs can be loaded and retained during the dynamic placement process under high  $T$ . 3) The  $\text{Mo}_x\text{C}$  supports with small sizes should be uniformly dispersed on the carbon scaffold to enhance the probability of NM NPs encountering the  $\text{Mo}_x\text{C}$  surface during the PMC mechanism.

To meet these requirements, we designed a synthesis route (Fig. S4) that uses the IM-EISA process to synthesize aNM/ $\text{Mo}_x\text{C}$ . As the solvent evaporates, microphase separation into hydrophilic and hydrophobic domains occurs to form mesoporous structure throughout the framework. During the IM-EISA process, the molecular interaction between precursors and amphiphilic block copolymer facilitates the homogeneous distribution of metal species on hydrophilic domains by partially offsetting precursor interactions. IM-EISA can sufficiently

reduce the NM particle size and achieve uniform distributions of NM and Mo<sub>x</sub>C supports on mesoporous Mo<sub>x</sub>C-C nanocomposite, because the hydrophilic domains that are composed of PEO moiety, PF-resin, and MF-resin stabilize the Mo and NM precursor via molecular interactions with the aim to distribute them homogeneously among hydrophilic domains. The first thermal treatment converts the PF resin to a mesoporous carbon scaffold, which the Mo precursor reacts with to form Mo<sub>x</sub>C supports. The homogeneously distributed NM precursors are reduced to yield NM NPs with small size of only ~5 nm. Consequently, NM NPs form on both the carbon and Mo<sub>x</sub>C surfaces of mesoporous heterostructured Mo<sub>x</sub>C-C nanocomposite after the first thermal treatment. The second thermal treatment (air activation) improves the hydrogen evolution activity of Mo<sub>x</sub>C.<sup>5</sup>

To obtain a high density of anchoring sites of Mo<sub>x</sub>C and prevent further sintering of NM NPs even above  $T_{\text{tam-NM}}$ , we designed mesoporous heterostructured Mo<sub>x</sub>C and carbon nanocomposite supports. A high content (~50 wt%) of Mo<sub>x</sub>C supports are uniformly composited using a mesoporous carbon scaffold. Above  $T_{\text{tam-NM}}$ , the high thermal stability of the carbon scaffold prevents a decrease in anchoring site density on Mo<sub>x</sub>C by retaining the mesoporous structure and inhibiting the thermal collapse of the Mo<sub>x</sub>C nanostructure. In this way, the Mo<sub>x</sub>C supports supply a high specific surface area and numerous defective sites, and the mesoporous carbon scaffold helps to retain the nanostructure of Mo<sub>x</sub>C even at a high  $T$  of 1,373 K. Furthermore, the mesoporous structure offers sufficient spacing between NM NPs, which serves as a physical barrier. The high content of Mo<sub>x</sub>C in the heterostructured supports increases the chance that NM NPs meet the Mo<sub>x</sub>C surface before colliding with other NM NPs during the PMC mechanism. Consequently, the sintering of NM NPs via the PMC mechanism is prevented effectively. Overall, by designing heterostructured supports, the Mo<sub>x</sub>C-C nanocomposite support can meet all requirements for NM ADCs: high thermal stability, ease of nanostructuring, weak MSI of carbon, favorable \*OH binding, high electrochemical stability, high electrical conductivity, and high MSI of Mo<sub>x</sub>C.

**Note S5. Exclusion of the atom-trapping mechanism and Pt loss on carbon supports.** Synthesis route utilizing volatile NM species and support with strong MSI.

Previously, it was reported that NM ADCs can be prepared using atom-trapping. In this approach, supports with strong MSI trap volatile NM species (*e.g.*, NM·O<sub>x</sub>, NM·(NH<sub>3</sub>)<sub>x</sub>) during thermal treatment under specific conditions such as O<sub>2</sub> and NH<sub>3</sub>.<sup>6,7</sup> To confirm that the dynamic placement induces the formation of NM ADCs and not the atom-trapping mechanism, *in situ* transmission electron microscopy (TEM) was conducted in a vacuum during annealing to 1,373 K (final carburization process). During the thermal treatment, two single-crystalline Pt NPs loaded on Mo<sub>x</sub>C-C were disappeared (Fig. 1i-k, Fig. S9-10), and Pt ADCs selectively loaded on Mo<sub>x</sub>C supports after annealing (Fig. 1g, Fig. S1). Since volatile Pt species cannot form under vacuum due to the absence of gaseous ligands such as CO, NH<sub>3</sub>, and O<sub>x</sub>, the atom-trapping mechanism can be excluded. Therefore, the dynamic placement of Pt ADCs selectively on Mo<sub>x</sub>C supports occurred spontaneously in both inert gas and vacuum atmospheres.

The selective positioning of the NM ADCs on the Mo<sub>x</sub>C supports is attributed to the PMC

mechanism for Pt NPs initially present on carbon supports. However, weak Pt-carbon interactions could cause the Pt species on carbon supports to be removed via melting or vaporization during the final carburization process. To exclude this possibility, ICP-MS measurements were conducted on aPt/Mo<sub>x</sub>C before and after carburization. If there is a loss of the Pt species on carbon during carburization, the Pt-to-Mo molar ratio would decrease after carburization. During the carburization process in our study, the total sample mass decreased from 1.571 to 1.204 g (**Fig. S7**), primarily because of the decomposition of the oxygenated carbon group or the reduction of the oxygenated metal species by carbon.<sup>8</sup> This total mass reduction caused the Pt content to increase from 3.942 to 5.071 wt% and the Mo content to increase from 44.05 to 54.56 wt% (**Table S1**). Notably, the Pt-to-Mo molar ratio remained nearly unchanged, with only a slight shift from 5.502 before carburization to 5.715 afterward. Consequently, we were able to multiply the reduction ratio of the total mass during carburization (0.766) by measured contents to calculate the corrected metal contents, which accounted for carbon mass loss. The corrected Pt content after carburization was determined to be 3.884 wt%, which closely matches the initial value of 3.942 wt%. This finding confirms that the Pt content remained intact throughout the process without being lost via melting or vaporization.

**Note S6. Dynamic placement of various NM species.** The affinity of Mo<sub>x</sub>C for NM types determines the atom-dimension structure of NM and whether dynamic placement occurs.

From the theoretical calculation (Fig. 2a-b), Ir, Pd, and Rh, which have similar relative  $E_b$ , were expected to undergo dynamic placement during the high- $T$  carburization (1,373 K). However, Ag and Au expected that dynamic placement would be somewhat difficult for them due to their low relative  $E_b$ .

To identify the theoretical expectation experimentally, we used EISA to prepare comparison groups with different NM precursors (aNM/Mo<sub>x</sub>C, NM: Ag, Au, Pt, Ir, Pd, Rh; and No without NM). N<sub>2</sub> physisorption, small angle X-ray scattering (SAXS), and scanning electron microscopy (SEM) indicate that mesoporous heterostructure developed, regardless of the type of NM precursor (Fig. S15-19). N<sub>2</sub> isotherms for aNM/Mo<sub>x</sub>C exhibit type-IV curve and H<sub>1</sub>-type hysteresis, which indicates that aNM/Mo<sub>x</sub>C has three-dimensional pore networks composed of large mesopores inside the particles (intraparticle pore) and a narrow distribution of pore size.<sup>9</sup> The peak intensity of SAXS can be changed by many factors, including the beam exposure time and the amount of sample. Peak intensity was normalized to enable the comparison of geometric structure data. These results indicate that mesoporous structures developed for whole particles and they shared similar structural characteristics.<sup>10</sup>

In addition, the absence of NM peaks in XRD of aNM/Mo<sub>x</sub>C except for aAg/Mo<sub>x</sub>C suggests that any crystalline NM was present below the detection limit of XRD except for Ag (Fig. S20). The auto-catalytic effect of NM stabilizes certain phases of Mo<sub>x</sub>C according to the NM species, so the ratio of  $\alpha$ -MoC to  $\beta$ -Mo<sub>2</sub>C changes according to the type of NM.<sup>11</sup>

**Note S7. Effects of synthesis conditions to prevent Pt agglomeration.** Effects of thermal treatment condition for NM reduction, porous structure of supports, and the presence of  $\text{Mo}_x\text{C}$  supports.

To identify the function of the thermal treatment condition, the porous structure of supports (as a physical barrier), and the presence of  $\text{Mo}_x\text{C}$  supports, Pt precursor was loaded (with similar loading of aPt/ $\text{Mo}_x\text{C}$ , ~5.2 wt%) onto various supports using IWI (incipient wetness impregnation); commercial carbon (Vulcan XC 72R, CC), mesoporous carbon (mesocellular carbon foam (MSUF-C), MC), and mesoporous heterostructured  $\text{Mo}_x\text{C}$ -C (aNo/ $\text{Mo}_x\text{C}$ ). Two thermal treatments were used: 1) Thermal reduction under 10v/v% of  $\text{H}_2/\text{Ar}$  with low- $T$  (373 K, the kinetic approach), which is indicated by appending  $\text{H}_2$ . 2) Thermal treatment under Ar with high- $T$  carburization (1,373 K, the thermodynamic approach), which is indicated by appending  $\text{Ar}$ .

$\text{N}_2$  physisorption, SAXS, and SEM reveal that thermal treatment conditions did not affect the structural characteristics of the supports (Fig. S27-31). STEM revealed the presence of large Pt agglomerates for samples prepared by IWI (Pt/CC\_ $\text{H}_2$ , Pt/CC\_ $\text{Ar}$ , Pt/MC\_ $\text{H}_2$ , and Pt/MC\_ $\text{Ar}$ ), which indicates that IWI cannot achieve uniform loading of Pt precursor on supports (Fig. S32-33). STEM and XRD results suggest that porosity and low- $T$  reduction alleviate the thermal sintering of Pt (Fig. S32-34). However, carbon supports have weak MSI for Pt, so the atom-dimension structure of Pt is difficult to retain, and dynamic placement of Pt cannot occur.

Furthermore, SEM and STEM images of Pt/CC\_ $\text{H}_2$ , Pt/CC\_ $\text{Ar}$ , Pt/MC\_ $\text{H}_2$ , and Pt/MC\_ $\text{Ar}$  (Fig. S30-33) revealed several large Pt agglomerates, which were not observed in similar images of PtNP/ $\text{Mo}_x\text{C}$ -C (Fig. S5). This difference indicates that IM-EISA is more beneficial than IWI for uniform loading of Pt species on supports, because Pt precursors are selectively incorporated and homogeneously distributed by molecular interaction with PEO-b-PS, which offsets precursor interactions. In contrast, IWI cannot adequately mitigate precursor interactions, which leads to the formation of large Pt agglomerations. In addition, carbon supports have low MSI and only a low density of anchoring sites that have adequate affinity for Pt. Therefore, carbon supports do not have sufficient capacity to disperse high loading (~5 wt%) of Pt species. During low- $T$  reduction, Pt agglomerates show an irregular morphology with similar crystallite size regardless of porosity, and Pt with atom-dimension structure (single-atom Pt: red circle, Pt atomic cluster: orange circle) was plentiful (Fig. S32, S34). This result means that the low- $T$  process kinetically impedes thermal migration or crystallization of Pt species, thereby helping to maintain the atom-dimension structure of Pt. In contrast, high- $T$  carburization (1,373 K) promotes thermal migration or crystallization of Pt species, so Pt with atom-dimension structure disappears and Pt agglomerates grow to form spherical crystallites (Fig. S33-34). Compared with Pt of Pt/CC\_ $\text{Ar}$ , Pt of Pt/MC\_ $\text{Ar}$  has more and smaller NPs (< ~5 nm) in STEM images and features a smaller average crystallite size (Fig. S33-34); these differences confirm that porosity functions as a physical barrier that can prevent thermal sintering of Pt.

**Note S8. Change of geometric structure of NM during dynamic placement.** The dynamic placement constructs the distinct structures (interfacial active systems) between NM ADCs and Mo<sub>x</sub>C supports, which are distinguished from other NM ADCs on carbon- or oxide-based supports.

The X-ray absorption near-edge structure (XANES) of aNM/Mo<sub>x</sub>C is distinct from those of NM foil or NM oxide. These differences imply that NM ADCs have different coordination environments with them (Fig. 3c, Fig. S51).<sup>12</sup> In the XANES region, aNM/Mo<sub>x</sub>C exhibited a white line intensity (for the L<sub>3</sub>-edge) or edge shift (for the K-edge) similar to those of the NM foil, indicating that the NM ADCs possessed metallic characteristics (Figs. 3c-d, Fig. S51). These metallic characteristics were attributed to the electronic MSIs between the NM ADCs and the metallic Mo<sub>x</sub>C supports. Similarly, the white line intensity of both Pt/Mo<sub>x</sub>C\_H<sub>2</sub> and Pt/Mo<sub>x</sub>C\_Ar was comparable to that of the NM foil, implying that the average oxidation state of Pt species in these samples was metallic (Fig. S51). These results suggest that the observed metallic characteristics were likely due to either the electronic MSI between the Pt species and Mo<sub>x</sub>C supports or the presence of large Pt agglomerates (owing to their higher proportion of internal Pt atoms relative to surface Pt atoms).

The Pt 4f XPS spectra of Pt/Mo<sub>x</sub>C\_Ar also revealed metallic characteristics, which is consistent with the XANES results (Fig. 3b). However, the Pt 4f XPS data for Pt/Mo<sub>x</sub>C\_H<sub>2</sub> indicated cationic characteristics, which does not align with the metallic features observed in the XANES results (Fig. 3b). STEM imaging of Pt/Mo<sub>x</sub>C\_H<sub>2</sub> revealed that Pt species were present as atomically dispersed catalysts, sub-nano clusters, or large agglomerates (Fig. S36). Additionally, the low-*T* reduction (373 K) was insufficient to induce an electronic MSI between the Pt species and supports, leading to cationic characteristics for the Pt ADCs or Pt nanoclusters in Pt/Mo<sub>x</sub>C\_H<sub>2</sub>, which is consistent with previous findings for single-atom Pt catalysts.<sup>13,14</sup> Furthermore, the low-*T* reduction resulted in low crystallinity and incomplete ligand removal (Table S6), which contributed to the cationic characteristics of the surfaces of the large Pt agglomerates. In conclusion, the oxidation state and EXAFS fitting results (Tables S5-6) for both Pt/Mo<sub>x</sub>C\_H<sub>2</sub> and Pt/Mo<sub>x</sub>C\_Ar confirmed the presence of large Pt agglomerates, which were absent in aNM/Mo<sub>x</sub>C.

Fourier transforms of extended X-ray absorption fine structure (FT-EXAFS) with corresponding fitting results and wavelet transform of EXAFS (WT-EXAFS) suggest the change of structural parameters of samples, which explains the synthesis mechanism and differences from the synthesis strategy (EISA vs. IWI). Before final carburization (Fig. 3g, Table S6), Pt/Mo<sub>x</sub>C-C at 873 K, Pt/Mo<sub>x</sub>C-C at 1,123 K, and Pt/Mo<sub>x</sub>C-C at 403 K (Pt/Mo<sub>x</sub>C-Cs) has ~8 of Pt-Pt coordination, but after final carburization aPt/Mo<sub>x</sub>C has no Pt-Pt coordination with ~1 Pt-Mo coordination. This indicates that Pt NPs were disintegrated into Pt ADCs, and Pt ADCs were selectively loaded on Mo species (Mo<sub>x</sub>C supports) after the final carburization. In addition, the bond length of Pt-sMo was changed during the final carburization from ~2.72 Å (Pt/Mo<sub>x</sub>C-Cs) to ~2.84 Å (aPt/Mo<sub>x</sub>C). Based on Vegard's law, the Pt species in Pt/Mo<sub>x</sub>C-C were likely in an alloy form with dilute Mo content, as evidenced by the bond lengths of Pt-Pt (~2.70 Å) and Pt-Mo (~2.72 Å) being comparable to the Pt-Pt bond length in bulk Pt (~2.76 Å).<sup>15,16</sup> However, the bond length of Pt-Mo (~2.84 Å) in aPt/Mo<sub>x</sub>C

showed a large difference compared to those in Pt/Mo<sub>x</sub>C-Cs, indicating that Pt species in aPt/Mo<sub>x</sub>C were not alloyed with Mo species but forms Pt ADCs on Mo<sub>x</sub>C supports. In addition, samples obtained by IWI showed ~6 Pt-Pt coordination, indicating the inevitable formation of large Pt agglomerates. This result indicates that IWI is insufficient for mitigating precursor interaction which is necessary for homogeneous loading of NM precursor onto supports.

Unlike aPt/Mo<sub>x</sub>C, Pt/Mo<sub>x</sub>C\_Ar exhibited a prominent second-shell magnitude in its FT-EXAFS graph, whereas Pt/Mo<sub>x</sub>C\_H<sub>2</sub> exhibited a similar magnitude to that of aPt/Mo<sub>x</sub>C (**Figs. S52a, e, f**). To further elucidate the coordination environment, EXAFS fitting was performed. Specifically, aPt/Mo<sub>x</sub>C was observed to have no Pt-Pt coordination. However, the IWI-prepared samples had Pt-Pt coordination numbers of 6, that is, 6.14 for Pt/Mo<sub>x</sub>C\_H<sub>2</sub> and 6.35 for Pt/Mo<sub>x</sub>C\_Ar (**Table S6**). These results confirm that molecular interactions between the block copolymers and NM precursors effectively mitigated the interaction between the NM precursors, leading to atomically dispersed Pt after high-*T* annealing. In contrast, the absence of such interaction mitigation in the IWI-prepared samples resulted in the formation of large NM agglomerates.

Since WT-EXAFS can distinguish the *k*-dependence of EXAFS (WT-EXAFS can distinguish the relative atomic number *Z* value by *k* resolution), it is effective to distinguish the *Z* of the coordinating atom at a similar distance *R*.<sup>17</sup> WT-EXAFS of Pt, PtO<sub>2</sub>, Pt/Mo<sub>x</sub>C-Cs, and Pt/Mo<sub>x</sub>C\_H<sub>2</sub> has an intensity maximum in the *k* region 8.5 to 9.5 Å, but that of aPt/Mo<sub>x</sub>C has an intensity maximum at *k* of ~7.7 Å (Fig. 3i-j). These results suggest differences of coordinating atoms in the second shell: Pt-Pt for Pt, PtO<sub>2</sub>, Pt/Mo<sub>x</sub>C-Cs, and Pt/Mo<sub>x</sub>C\_H<sub>2</sub>; Pt-Mo for aPt/Mo<sub>x</sub>C. For Pt/Mo<sub>x</sub>C\_Ar, its WT-EXAFS has an intensity maximum at *k* of ~8.2 Å due to the coexistence of Pt-Pt (~6.35 coordination number) and Pt-Mo (~1.82 coordination number) (Table S6). These results indicated that the coordinating atoms (Mo) of Pt in aPt/Mo<sub>x</sub>C have lower *Z* values than those (Pt) of others in the second shell of FT-EXAFS.

The WT-EXAFS of PtO<sub>2</sub>, Pt/Mo<sub>x</sub>C-Cs, and Pt/Mo<sub>x</sub>C\_Ar show an intensity maximum in the *k* region 5.5 to 6 Å, but that of aPt/Mo<sub>x</sub>C has an intensity maximum at *k* of ~5.2 Å (Fig. 3i-j). These results imply that coordinating atoms of Pt in aPt/Mo<sub>x</sub>C have a lower *Z* value than others (O) in the first shell of FT-EXAFS. The presence of Pt-O coordination in Pt/Mo<sub>x</sub>C-Cs and Pt/Mo<sub>x</sub>C\_Ar originated from the surficial Pt-O coordination for Pt NPs. Distinguishing the coordinating atom of the first shell in FT-EXAFS is somewhat difficult due to the limited resolution of *Z* in EXAFS fitting (*Z* ≈ ±2).<sup>17</sup> The imaginary part of FT-EXAFS is highly sensitive to coordinating environments (type of neighboring atoms, bond lengths, *etc.*), so it can supply information about changes in coordinating environments.<sup>18,19</sup> The imaginary part of aPt/Mo<sub>x</sub>C at the first shell of FT-EXAFS showed differences from that of others, indicating that there existed differences for coordinating environment (Fig. S53-55). The EXAFS fitting shows that Pt in aPt/Mo<sub>x</sub>C was stabilized by ~3 of Pt-C coordination with a bond length of ~2.11 Å, which was quite longer than that (~1.95 Å) of the Pt-O coordination of Pt NPs (Pt/Mo<sub>x</sub>C-Cs and Pt/Mo<sub>x</sub>C\_Ar) (Fig. 3h, Table S6). Compared to others, aPt/Mo<sub>x</sub>C has large differences in bond length from EXAFS fitting and maximum intensity from WT-EXAFS. These suggested that the coordinating atom has a lower *Z* value than O, indicating that the coordinating atom might be C. The WT-EXAFS of Pt/Mo<sub>x</sub>C\_H<sub>2</sub> has intensity maximum at *k* of

$\sim 6.4$  Å, which has higher value than that of Pt/Mo<sub>x</sub>C-C, indicating that the coordinating atom of Pt/Mo<sub>x</sub>C-H<sub>2</sub> has a higher *Z* value than O (Fig. 3j). The EXAFS fitting results indicates that  $\sim 1.73$  Pt-Cl coordination with bond length of  $\sim 2.31$  Å contributes to this intensity maximum (Table S6). The presence of Pt-Cl coordination resulted from the incomplete removal of the Cl ligand of Pt precursor (H<sub>2</sub>PtCl<sub>6</sub>) by the low-*T* reduction under 10v/v% H<sub>2</sub>/Ar at 373 K (kinetic approach) which was generally employed for the preparation of Pt ADCs.<sup>20,21</sup>

**Note S9. Alkaline hydrogen oxidation reaction (HOR) activity and CO tolerance.** Samples obtained by dynamic placement exhibited increased kinetics and CO tolerance in alkaline HOR due to the advantages of an intimate interfacial active system between NM ADCs and Mo<sub>x</sub>C supports. According to studies on AEMFCs, a 1 M KOH electrolyte better reflects the actual OH<sup>-</sup> concentration (1-2 M) typically encountered in AEMFCs.<sup>22-24</sup> For the same reason, several durability tests for AEMs have been conducted using high OH<sup>-</sup> concentrations.<sup>24-26</sup> The effect of Mo<sub>x</sub>C supports on adjusting the interfacial water structure for reversible HER and HOR should also be evaluated under identical electrolyte conditions. Therefore, the HOR experiments were initially conducted in 1 M KOH.

The alkaline HOR activity of samples obtained via dynamic placement (aPt/Mo<sub>x</sub>C, aRh/Mo<sub>x</sub>C, and Pt/Mo<sub>x</sub>C-Ar) surpassed those of commercial Pt/C, and Pt/Mo<sub>x</sub>C-H<sub>2</sub> obtained by kinetic approaches (Fig. 4e, Fig. S70, Table S11). In addition, they reliably retained the current density until 0.4 V without oxidative degradation. To assess the kinetics of alkaline HOR, exchange current density  $j_0$  and kinetic current density at 25 mV ( $j_{k \text{ at } 25 \text{ mV}}$ ) per NM moles (molar kinetic activity) were calculated (Fig. 4f, Fig. S71-72, Table S11). aNM/Mo<sub>x</sub>C had 2-fold higher  $j_0$  and 5-fold higher molar kinetic activity than those of Pt/C and Pt/Mo<sub>x</sub>C-H<sub>2</sub>. Also, the molar kinetic activity of Pt/Mo<sub>x</sub>C-Ar was about twice that of Pt/C and Pt/Mo<sub>x</sub>C-H<sub>2</sub>, due to interfacial active systems between Pt ADCs and Mo<sub>x</sub>C supports through dynamic placement. However, the efficiency for NM utilization is lower than that of aPt/Mo<sub>x</sub>C because large Pt agglomerates formed by IWI cannot be disintegrated into Pt ADCs to form interfacial active systems. These results indicate that the intimate interfacial active system optimizes the absorbate  $E_b$  by electronic MSI to improve the alkaline hydrogen adsorption-desorption kinetics. In addition, the intimate interfacial active system can place a favorable \*OH binding site of Mo<sub>x</sub>C adjacent to NM ADCs to enhance the alkaline HOR kinetics by optimizing the interfacial water structure.

To demonstrate the superiority of the catalysts obtained via dynamic placement, HOR tests were also performed under the conventional condition of 0.1 M KOH. Notably, aPt/Mo<sub>x</sub>C had 2.0-fold higher  $j_0$  and 3.3-fold higher  $j_{k \text{ at } 25 \text{ mV}}$  per NM moles compared to commercial Pt/C (Fig. S73, Table S12). These results confirm that Mo<sub>x</sub>C supports improve the alkaline HOR kinetics even under dilute 0.1 M KOH conditions.

To demonstrate that the superior activity of aPt/Mo<sub>x</sub>C is attributable to its design strategy rather than its reduced NM loading, we conducted additional alkaline HER and HOR tests on Pt/C with the same Pt loading (31 μg cm<sup>-2</sup>) as aPt/Mo<sub>x</sub>C. The results revealed that aPt/Mo<sub>x</sub>C exhibited better performance than Pt/C, even with the same Pt loading. In the alkaline HER, aPt/Mo<sub>x</sub>C demonstrated 1.4-fold higher  $j_0$  and 5.2-fold higher  $j_{\text{at } 40 \text{ mV}}$  per NM moles than Pt/C

(Table S10, Figs. S74 a, b). In the alkaline HOR in 1 M KOH, aPt/Mo<sub>x</sub>C demonstrated 1.7-fold higher  $j_0$  and 4.5-fold higher  $j_k$  at 25 mV per NM moles than Pt/C (Table S11, Figs. S74 c, d). In the alkaline HOR in 0.1 M KOH, aPt/Mo<sub>x</sub>C demonstrated 1.8-fold higher  $j_0$  and 3.5-fold higher  $j_k$  at 25 mV per NM moles than Pt/C (Fig. S73, Table S12). These results confirm that the enhanced catalytic performance of aPt/Mo<sub>x</sub>C stems from its design strategy rather than its Pt loading.

Electrochemical characterization was performed in 1,000 ppm CO/H<sub>2</sub>-purged 1 M KOH to assess the CO tolerance in alkaline HOR. At an overpotential of 100 mV, aPt/Mo<sub>x</sub>C (14.0 %) and Pt/Mo<sub>x</sub>C\_Ar (15.3 %) have a slight decrease of  $j$  in the presence of CO than Pt/C (29.8 %) or Pt/Mo<sub>x</sub>C\_H<sub>2</sub> (47.8 %). Surprisingly, aRh/Mo<sub>x</sub>C (1.6 %) rarely suffered from CO poisoning (Fig. 4g-h, Fig. S75). In addition, samples prepared by dynamic placement had higher  $j_0$  and  $j_k$  at 25 mV compared with Pt/C and Pt/Mo<sub>x</sub>C\_H<sub>2</sub> (Fig. S76). To assess the kinetics of CO removal, we performed CO stripping. However, aNM/Mo<sub>x</sub>C showed no CO stripping  $j$ , possibly because \*CO binding is too weak (Fig. S66). *In situ* ATR-SEIRAS results supported that this is because the absence of strongly adsorbed CO on NM ADCs, which is different with Pt/C (Fig. S82).

Therefore, we performed electrochemical CO oxidation with CO purged 1 M KOH (Fig. S77). To enable ideal electrochemical CO oxidation, two requirements must be met: 1) appropriate strength of \*CO binding (neither too strong nor too weak, Sabatier's principle). 2) easy OH<sub>x</sub> supply to \*CO binding site.<sup>27,28</sup> Samples obtained by dynamic placement had superior CO oxidation kinetics compared with Pt/C and Pt/Mo<sub>x</sub>C\_H<sub>2</sub>, and CO oxidation efficiency decreased with a similar trend of CO tolerance. aNM/Mo<sub>x</sub>C has lower onset potential than both Pt/C and Pt/Mo<sub>x</sub>C\_H<sub>2</sub> (Fig. S77b). Pt/C suffers from CO poisoning due to the strong \*CO binding. Therefore, a decrease in onset potential for aNM/Mo<sub>x</sub>C implies a weakening of the CO adsorption as a consequence of the alteration in the geometric and electronic structure of NM by dynamic placement (Fig. S66). In addition, a fast increase of current density indicates a fast reaction kinetics, as a consequence of easy \*OH supply to NM sites where \*CO is located. Samples with an intimate interfacial active system between NM and Mo<sub>x</sub>C exhibit a faster increase in current density than NM on carbon. \*OH binding is more appropriate with Mo<sub>x</sub>C supports than carbon so that Mo<sub>x</sub>C supports can supply \*OH species more easily than the carbon support can. This indicates that increased CO oxidation kinetics improves the CO tolerance of aNM/Mo<sub>x</sub>C through easier removal of CO on NM sites. For chronoamperometry at 100 mV (Fig. S78a), samples prepared by dynamic placement showed better stability than Pt/C and Pt/Mo<sub>x</sub>C\_H<sub>2</sub>. With the presence of CO (Fig. S78b), samples obtained by dynamic placement are more stable than Pt/C and Pt/Mo<sub>x</sub>C\_H<sub>2</sub>. These results indicate that dynamic placement constructed an intimate interfacial active system between NM ADCs and Mo<sub>x</sub>C supports, so the strong MSI and high CO tolerance together increase the long-term stability of NM even in the presence of CO.

## Supplementary Figures

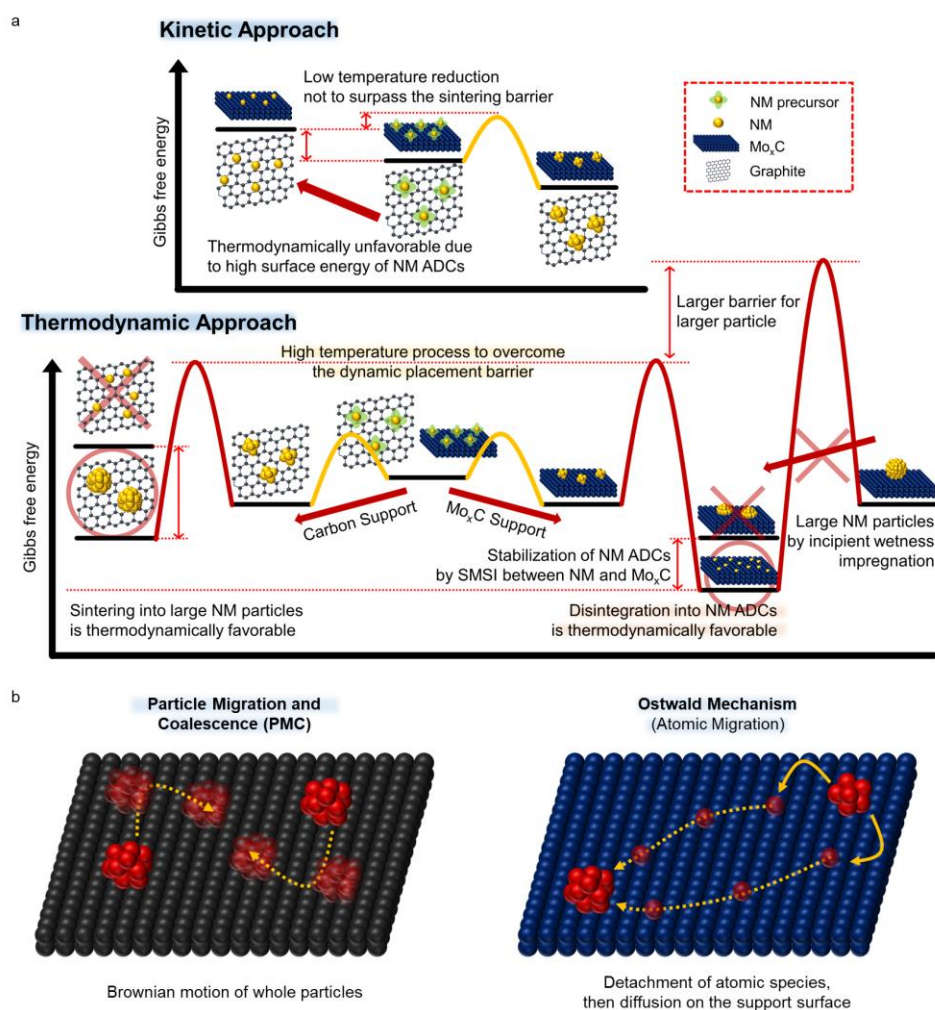

**Fig. S1** Synthesis strategy and mechanism. (a) Kinetic approach and thermodynamic approach in synthesis strategy. (b) PMC mechanism and Ostwald mechanism to sinter NM NPs. (c) Strategy to synthesize aNM/Mo<sub>x</sub>C by using IM-EISA and dynamic placement of NM selectively on Mo<sub>x</sub>C surface.

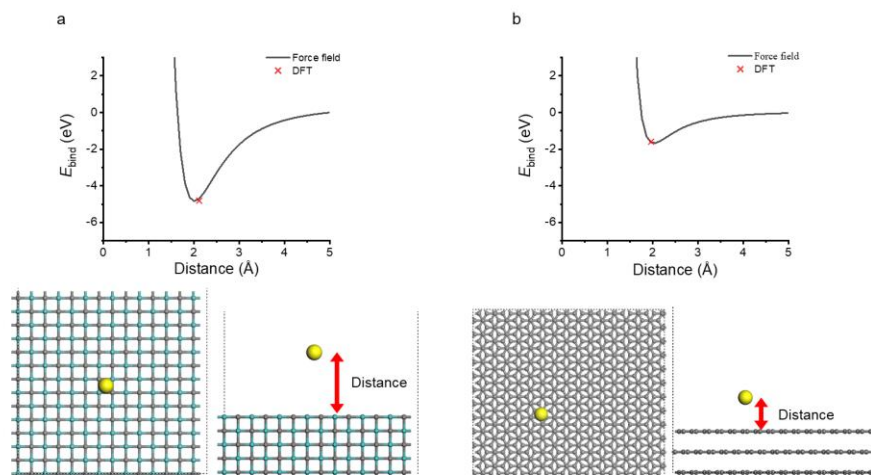

**Fig. S2** Theoretical models for binding energy of Pt on support. (a) The binding energy ( $E_{\text{bind}}$ ) of Pt on **a**,  $\alpha$ -MoC (100) and (b) graphite.  $E_{\text{bind}}$  is shown with respect to the distance. The FF parameters for the Lennard-Jones pairwise potential were set to reproduce the optimal binding energy and at a position comparable to the DFT value.

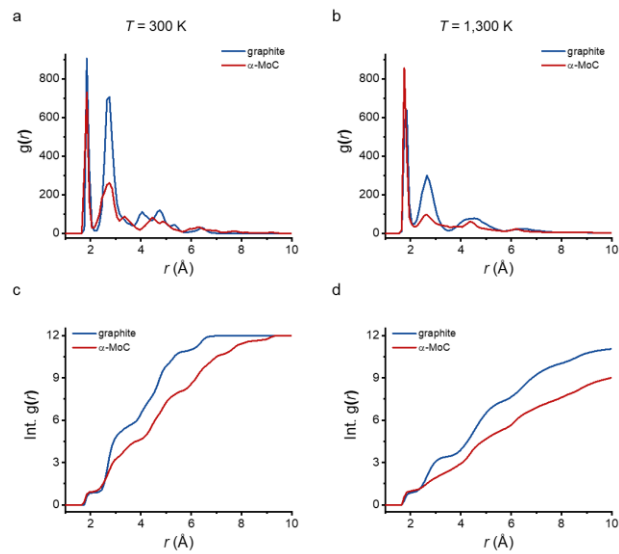

**Fig. S3** Radial distribution for Pt-Pt. Pt-Pt radial distribution function,  $g(r)$  and its integrated (Int.) value,  $\int_0^r 4\pi r'^2 g(r') dr'$ , for the distance  $r$  between Pt atoms of the cluster (a) at 300 and (b) 1,300 K for the graphite support (blue) and  $\alpha$ -MoC (100) support (red). The coordination number is read at  $r = 3.05$  Å.

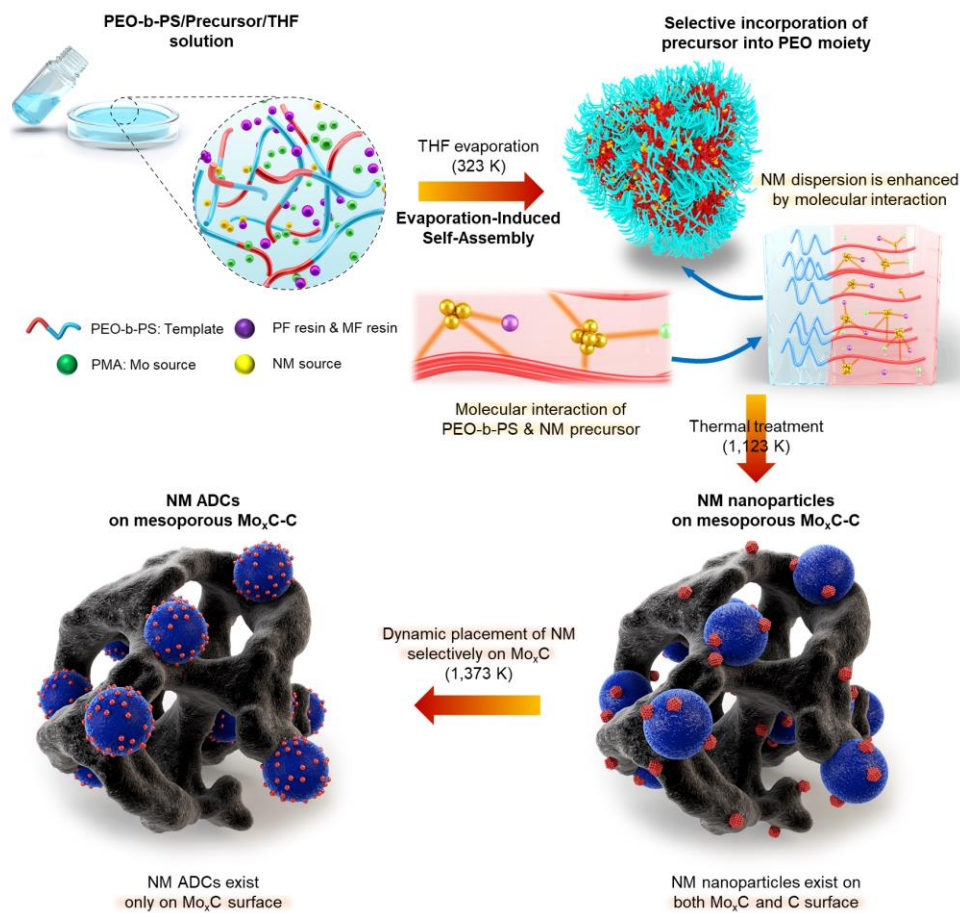

**Fig. S4** Self-assembly-assisted dynamic placement. (a) Strategy to synthesize aNM/Mo<sub>x</sub>C by using IM-EISA and dynamic placement of NM selectively on Mo<sub>x</sub>C surface.

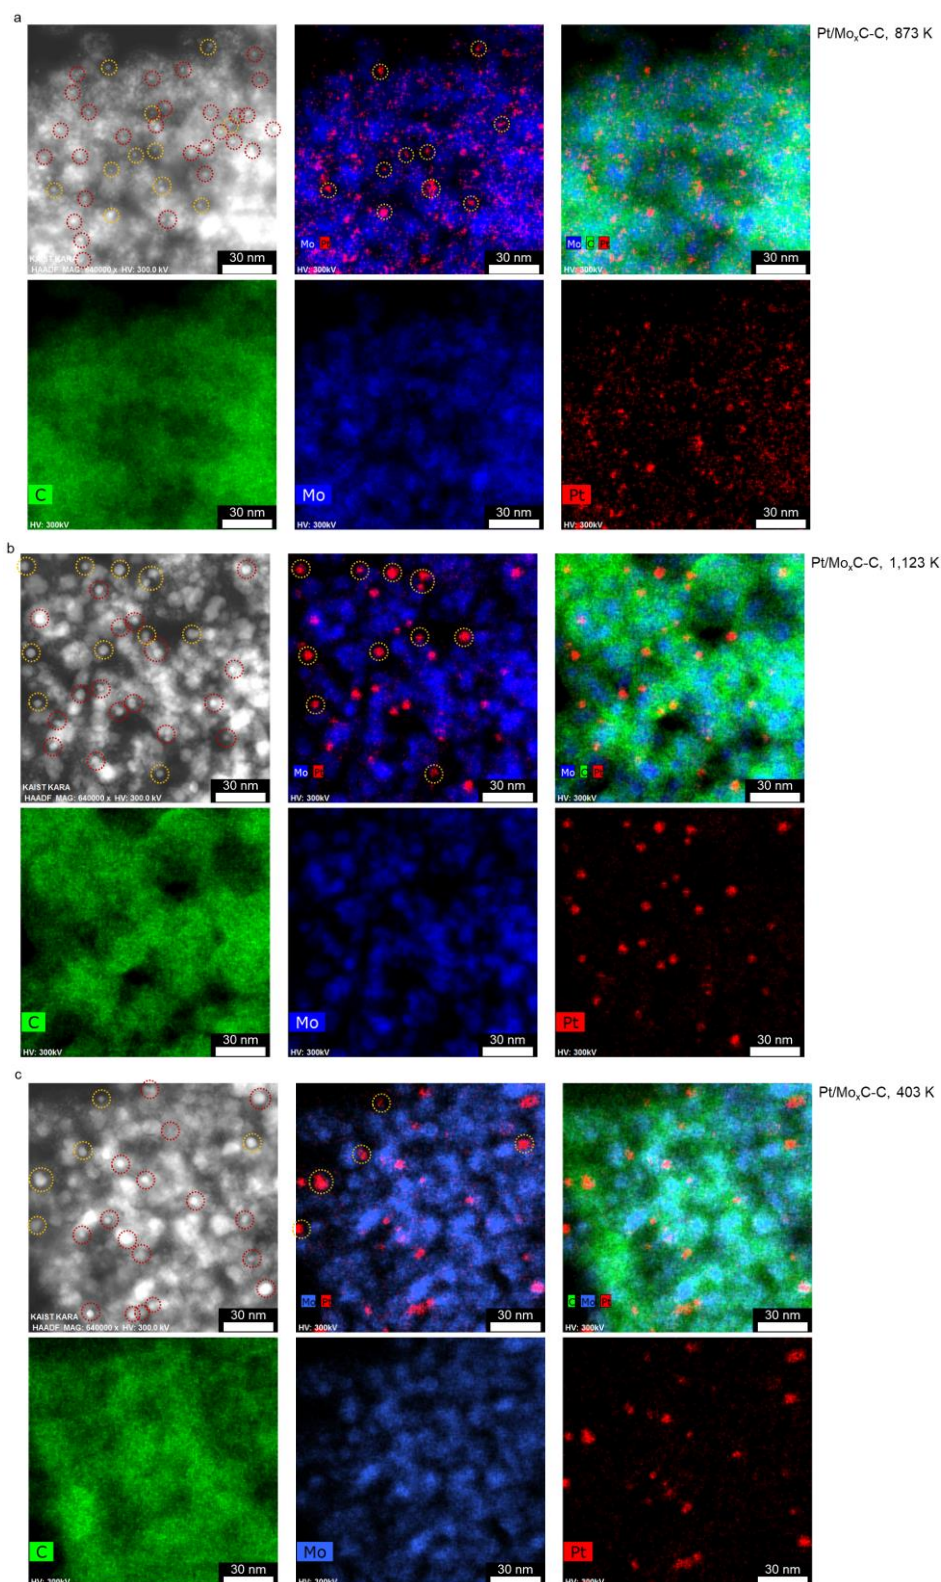

**Fig. S5** STEM analysis of Pt/Mo<sub>x</sub>C-C for each thermal treatment step. HAADF-STEM images and EDS mappings of Pt/Mo<sub>x</sub>C-C during synthesis for the first thermal treatment under Ar (a) at 873 K and (b) at 1,123 K, and for air activation under O<sub>2</sub>/Ar (c) at 403 K (red: Pt, blue: Mo, green: C). Orange circles: Pt NPs on carbon, red circles: Pt NPs on Mo<sub>x</sub>C [overlapped with Mo EDS mapping].

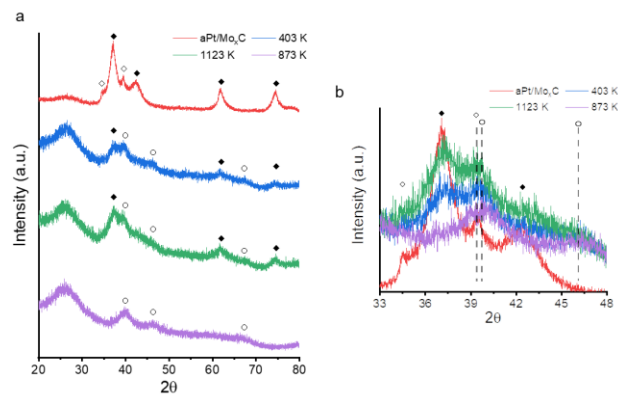

**Fig. S6** XRD analysis of Pt/Mo<sub>x</sub>C-C for each thermal treatment step. (a) XRD patterns for Pt/Mo<sub>x</sub>C-C during synthesis for first thermal treatment under Ar at 873 K (violet) and 1,123 K (green), and for air activation under O<sub>2</sub>/Ar at 403 K (blue), and for final carburization under Ar at 1,373 K (red) resulting in the synthesis of aPt/Mo<sub>x</sub>C. (b) Enlarged XRD patterns to distinguish the crystalline Pt species. (◆: α-MoC [JCPDS 01-089-2868], ◇: β-Mo<sub>2</sub>C [JCPDS 00-011-0608], ○: Pt [JCPDS 04-0802])

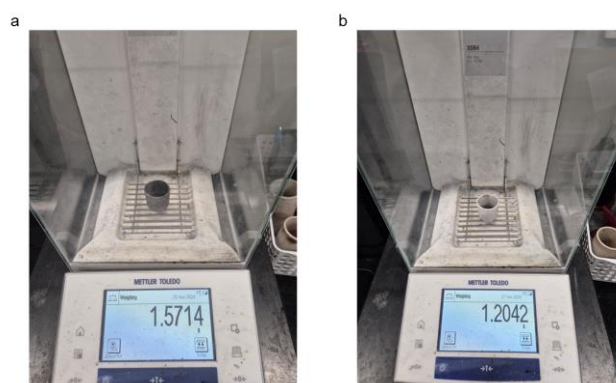

**Fig. S7** Change in total mass before and after final carburization. Optical photographs of (a) Pt/Mo<sub>x</sub>C-C at 403 K and (b) aPt/Mo<sub>x</sub>C.

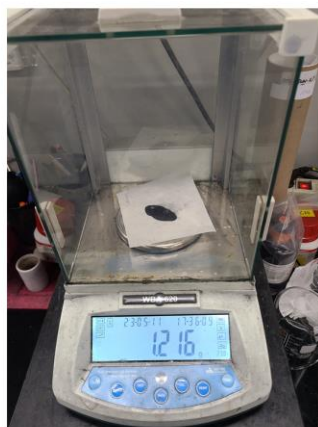

**Fig. S8** Gram-scale synthesis of aPt/Mo<sub>x</sub>C. The optical photograph for the gram-scale production of aPt/Mo<sub>x</sub>C.

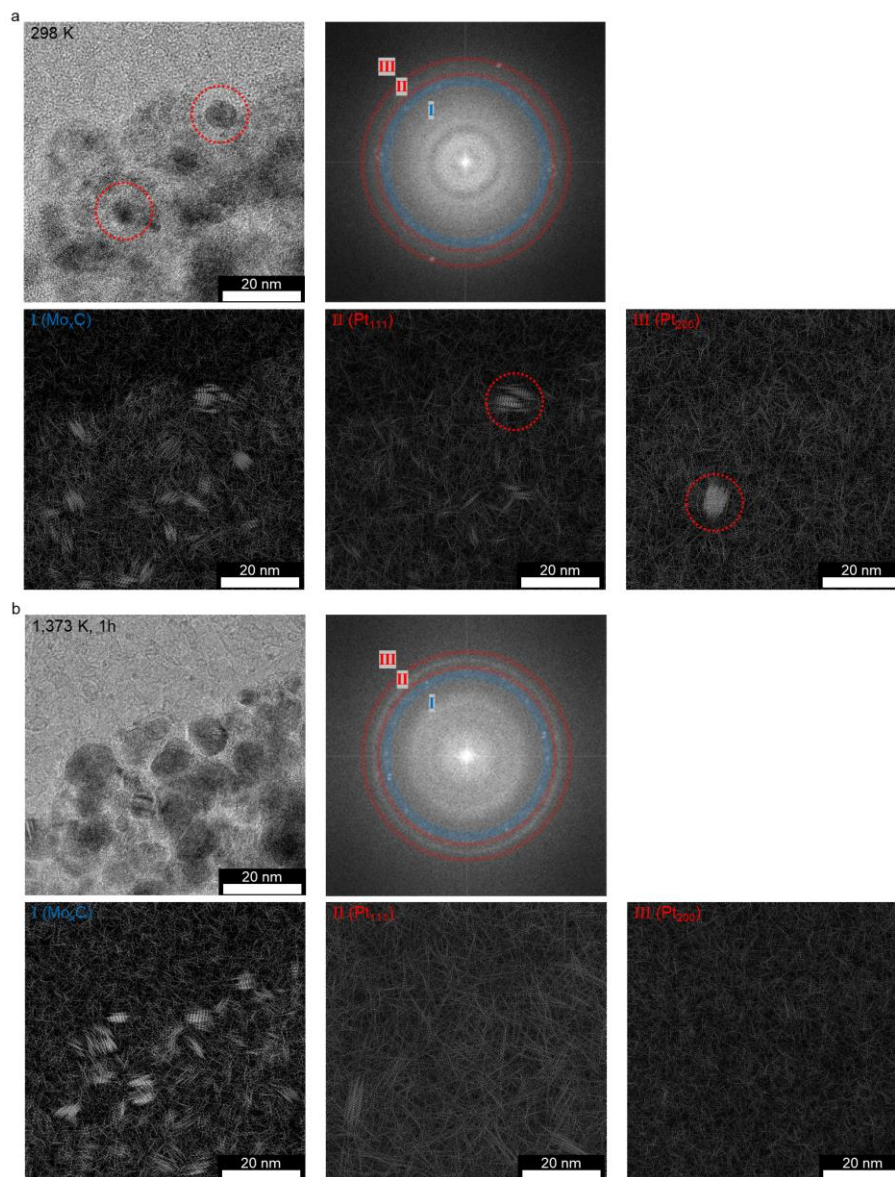

**Fig. S9** *In situ* TEM analysis at 298 and 1,373 K with fixed  $T$ . *In situ* TEM results, corresponding HR-TEM images, FFT pattern, and inverse FFT images at (a) 298 K and (b) 1,373 K with retaining  $T$  (Red circles: crystalline Pt). In the FFT pattern, red: Pt, blue:  $\alpha$ -MoC &  $\beta$ -Mo<sub>2</sub>C. Bandwidth for inverse FFT: I - Mo<sub>x</sub>C: 2.50 – 2.28 Å ( $\alpha$ -MoC &  $\beta$ -Mo<sub>2</sub>C), II - Pt<sub>111</sub>: 2.28 – 2.20 Å, III - Pt<sub>200</sub>: 2.00 – 1.90 Å. Scale bar: 20 nm.

Inverse FFT images showed the position of crystalline species with selected lattice spacing. Area I (blue) includes the (111) plane of crystalline  $\alpha$ -MoC, and the (101) and (002) planes of crystalline  $\beta$ -Mo<sub>2</sub>C. Area II (red) includes the (111) plane of crystalline Pt, and Area III (red) includes the (200) plane of crystalline Pt. The Pt NPs on the right include both crystalline Mo<sub>x</sub>C and Pt; this observation indicates that Pt might be placed on Mo<sub>x</sub>C. However, the Pt NPs on the left side, include only crystalline Pt; this observation indicates that Pt might be placed on carbon. At 1,373 K, no inverse FFT patterns of Pt were observed; this result indicates that final carburization eliminated crystalline Pt.

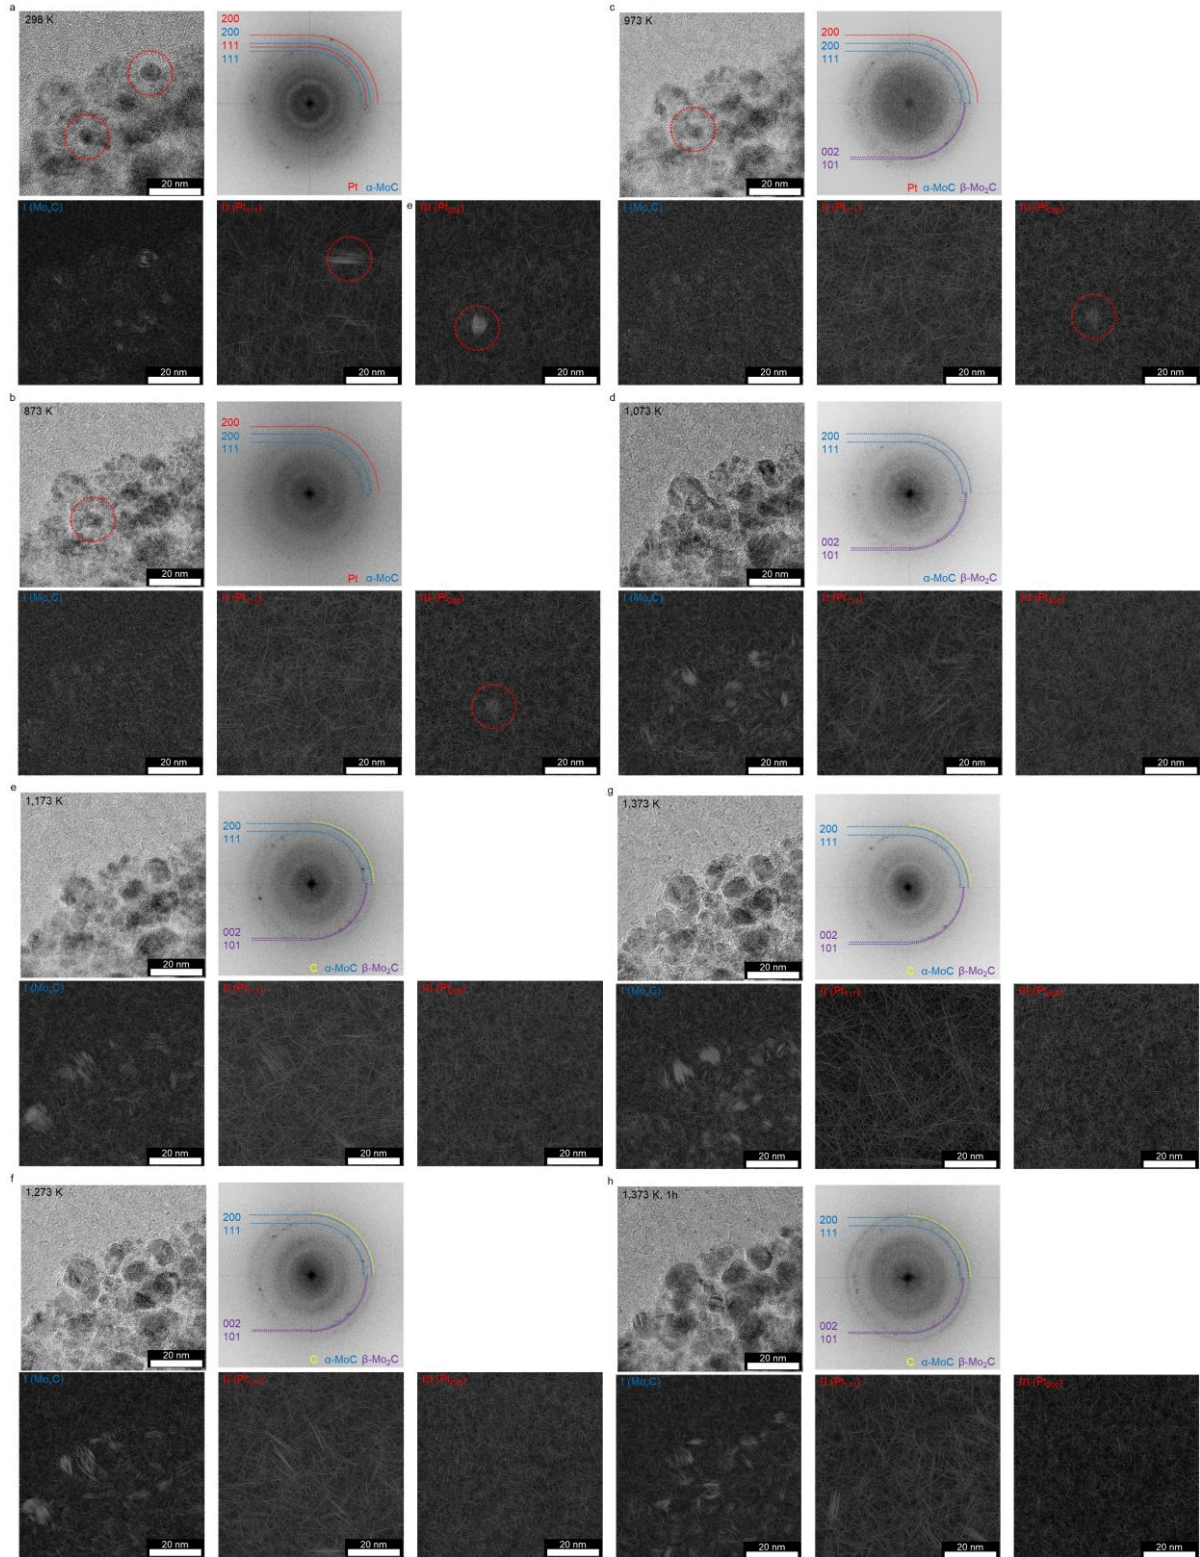

**Fig. S10** *In situ* TEM analysis with increasing  $T$  under vacuum. *In situ* TEM results, corresponding HR-TEM images, FFT pattern, and inverse FFT images at (a) 298 K, (b) 873 K, (c) 973 K, (d) 1,073 K, (e) 1,173 K, (f) 1,273 K, (g) 1,373 K, and (h) 1,373 K after 1 hr, with increasing  $T$  from 298 to 1,373 K during the final carburization process. Red circles: crystalline Pt. In FFT pattern, red: Pt, blue:  $\alpha$ -MoC, purple:  $\beta$ -Mo<sub>2</sub>C, and yellow: carbon. Bandwidth for inverse FFT: [I - Mo<sub>x</sub>C: 2.50 – 2.28 Å ( $\alpha$ -MoC &  $\beta$ -Mo<sub>2</sub>C), II - Pt<sub>111</sub>: 2.28 – 2.20 Å, III - Pt<sub>200</sub>: 2.00 – 1.90 Å]. Scale bar: 20 nm.

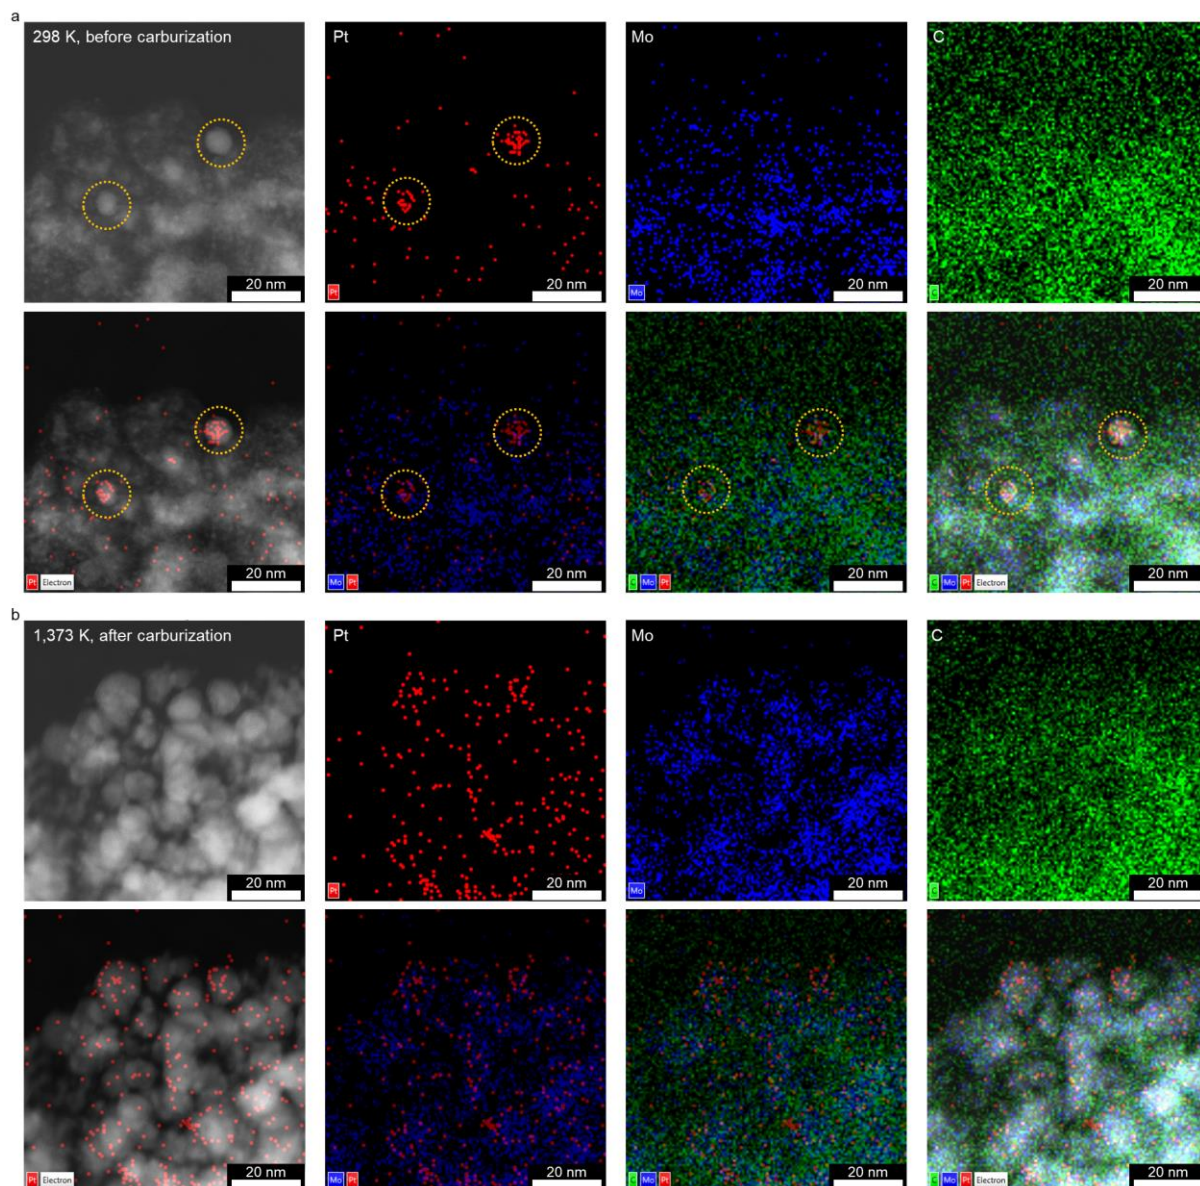

**Fig. S11** STEM analysis at identical position before and after annealing under vacuum. STEM images and corresponding EDS mappings (a) before (298 K) and (b) after (1,373 K) annealing at identical position (Red: Pt, Green: Mo, Blue: C, Orange circle: crystalline Pt species).

At 298 K, for Pt NPs on the right side, the EDS signals of Mo overlapped those of Pt; this result indicates that Pt was placed on  $\text{Mo}_x\text{C}$ , but for Pt NPs on the left, only the EDS signal for Pt existed; this result indicates that Pt was placed on carbon. At 1,373 K, no Pt agglomerates were observed, but the EDS signal of Pt was homogeneously and selectively overlapped on Mo EDS signal; this result indicates selective dynamic placement of Pt ADCs on  $\text{Mo}_x\text{C}$  supports.

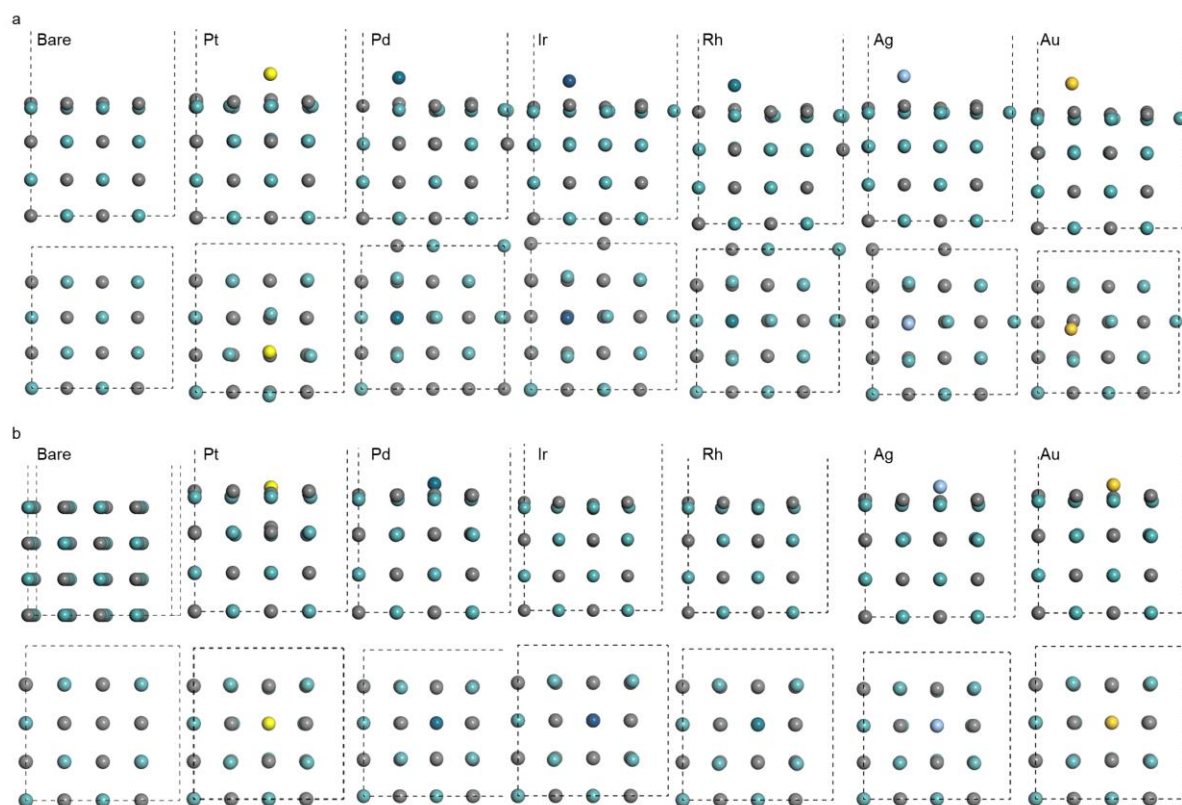

**Fig. S12** DFT models for binding energy of NM on  $\alpha$ -MoC (100). DFT models for calculating the binding energy of NM on  $\alpha$ -MoC (100) (a) without and (b) with Mo-vacancy.

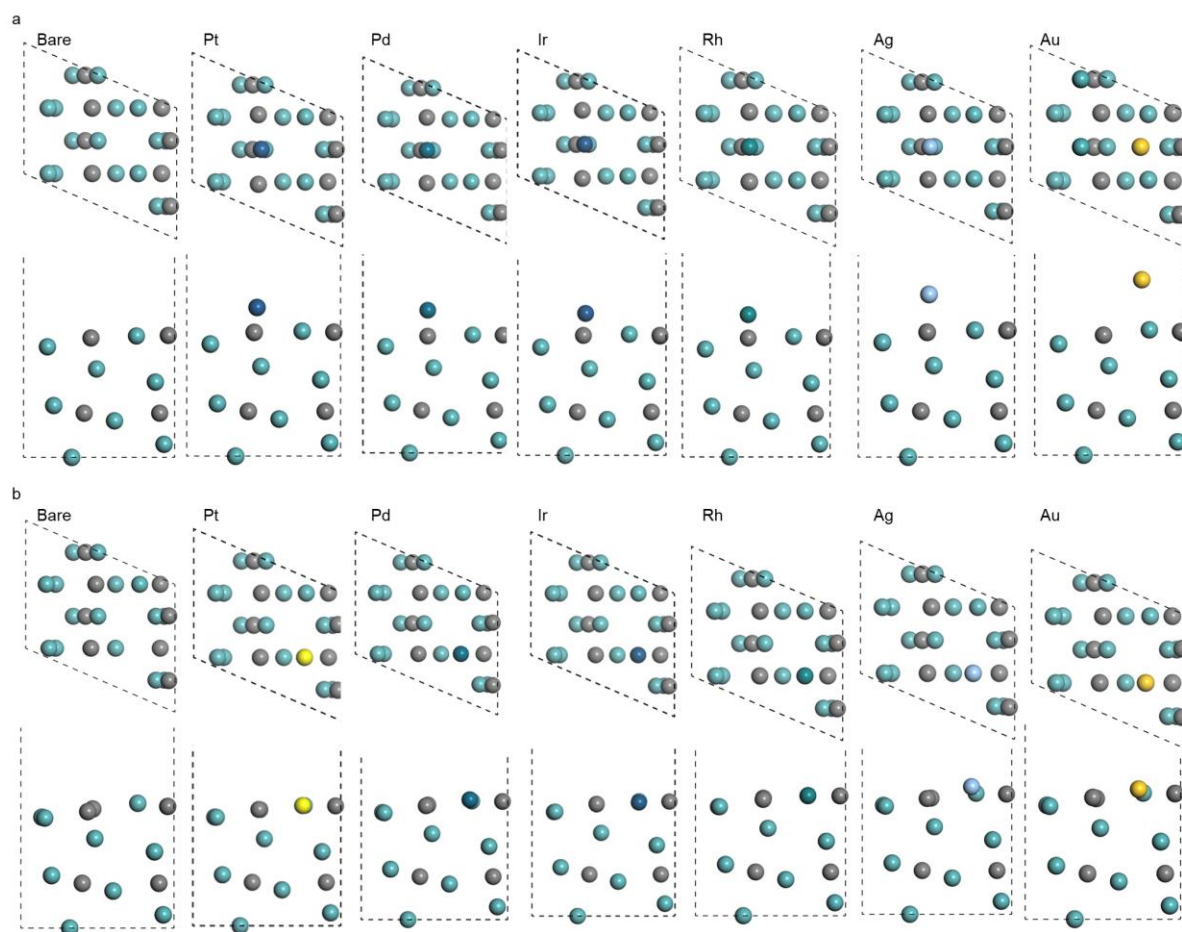

**Fig. S13** DFT models for binding energy of NM on  $\beta$ -Mo<sub>2</sub>C. DFT models for calculating the binding energy of NM on  $\beta$ -Mo<sub>2</sub>C (101) (a) without and (b) with Mo-vacancy.

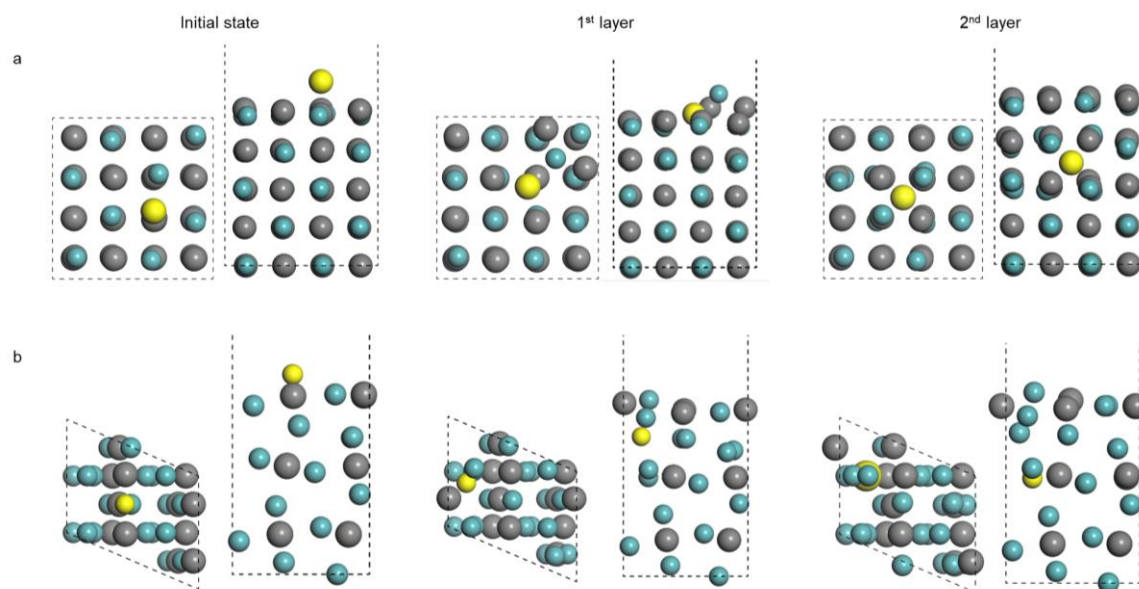

**Fig. S14** DFT models for the diffusion barrier. DFT models for calculating the diffusion barrier of Pt from topmost surface into bottom layers; (a)  $\alpha$ -MoC (001) and (b)  $\beta$ -Mo<sub>2</sub>C (101) cases. Other models for calculating the diffusion barrier of NMs (Pd, Rh, and Ir) have the similar geometries.

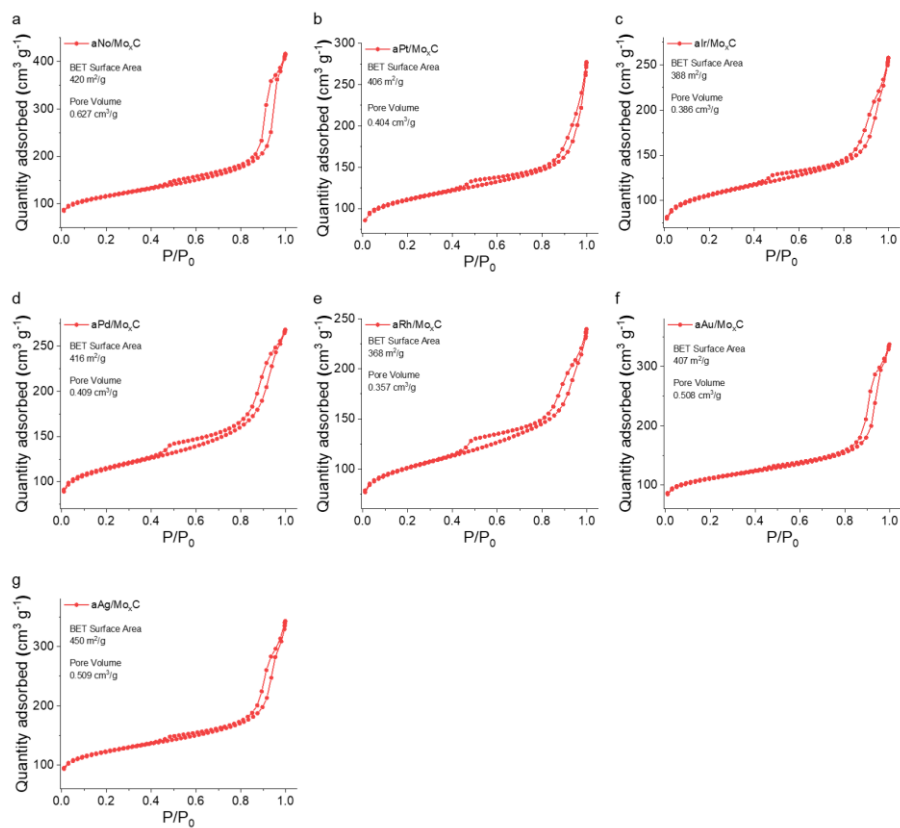

**Fig. S15** N<sub>2</sub> physisorption for aNM/Mo<sub>x</sub>C. N<sub>2</sub> adsorption-desorption isotherms of aNM/Mo<sub>x</sub>C for (a) aNo/Mo<sub>x</sub>C, (b) aPt/Mo<sub>x</sub>C, (c) aIr/Mo<sub>x</sub>C, (d) aPd/Mo<sub>x</sub>C, (e) aRh/Mo<sub>x</sub>C, (f) aAu/Mo<sub>x</sub>C, and (g) aAg/Mo<sub>x</sub>C with their BET surface area [m<sup>2</sup>·g<sup>-1</sup>] and pore volume [cm<sup>3</sup>·g<sup>-1</sup>].

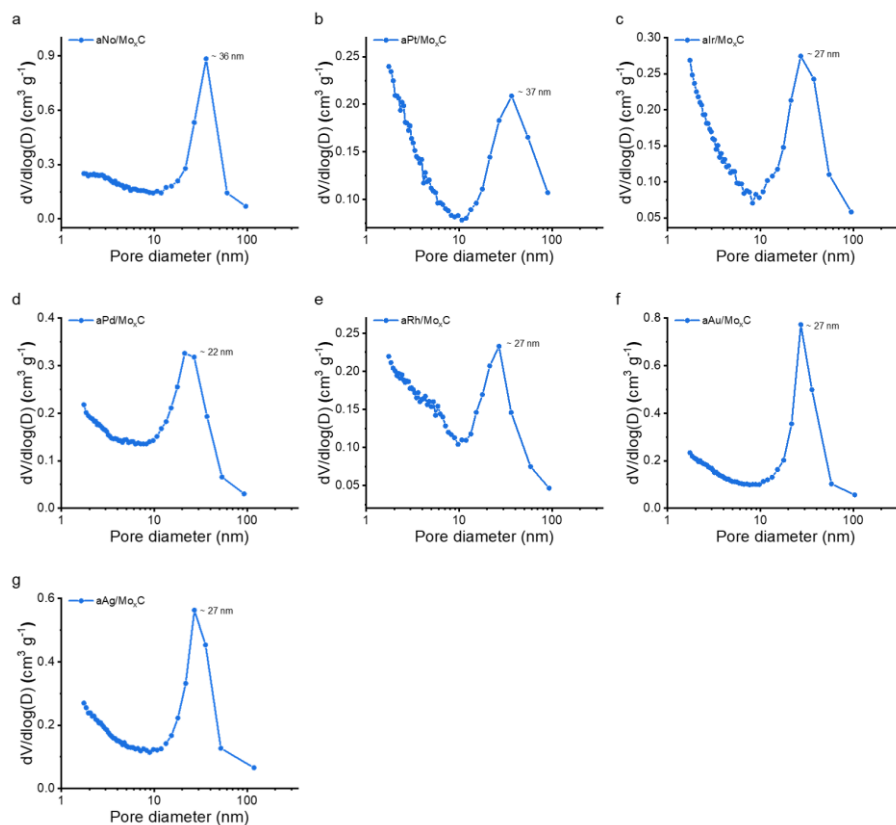

**Fig. S16** Pore size distribution for aNM/Mo<sub>x</sub>C. Pore size distribution from N<sub>2</sub> adsorption-desorption isotherms of aNM/Mo<sub>x</sub>C for (a) aNo/Mo<sub>x</sub>C, (b) aPt/Mo<sub>x</sub>C, (c) aIr/Mo<sub>x</sub>C, (d) aPd/Mo<sub>x</sub>C, (e) aRh/Mo<sub>x</sub>C, (f) aAu/Mo<sub>x</sub>C, and (g) aAg/Mo<sub>x</sub>C.

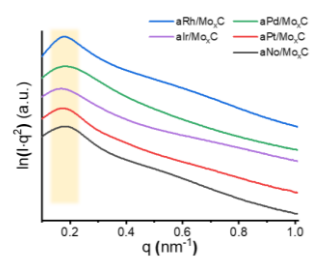

**Fig. S17** Small-angle X-ray scattering (SAXS) patterns for aNM/Mo<sub>x</sub>C. SAXS patterns of aNM/Mo<sub>x</sub>C for aNo/Mo<sub>x</sub>C aPt/Mo<sub>x</sub>C, aIr/Mo<sub>x</sub>C, aPd/Mo<sub>x</sub>C, and aRh/Mo<sub>x</sub>C.

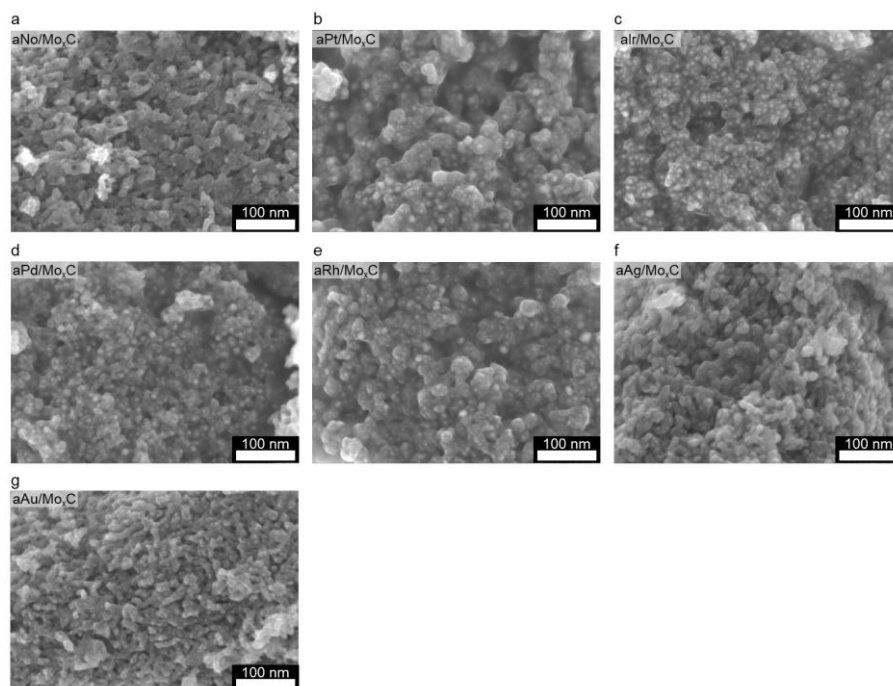

**Fig. S18** Scanning electron microscopy (SEM) images of aNM/Mo<sub>x</sub>C. SEM images of (a) aNo/Mo<sub>x</sub>C, (b) aPt/Mo<sub>x</sub>C, (c) aIr/Mo<sub>x</sub>C, (d) aPd/Mo<sub>x</sub>C, (e) aRh/Mo<sub>x</sub>C, (f) aAg/Mo<sub>x</sub>C, and (g) aAu/Mo<sub>x</sub>C.

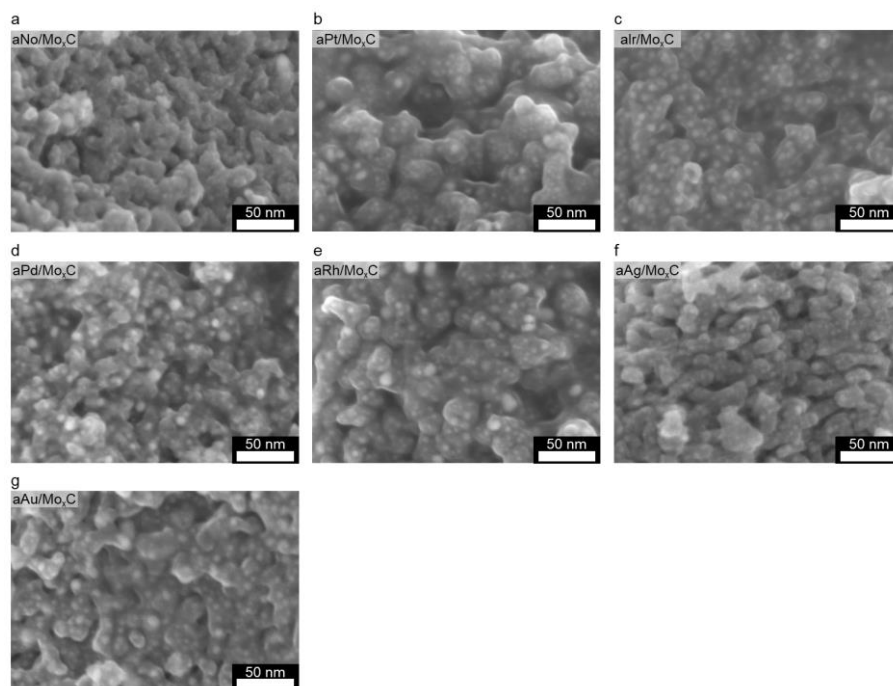

**Fig. S19** Enlarged SEM images of aNM/Mo<sub>x</sub>C. Enlarged SEM images of (a) aNo/Mo<sub>x</sub>C, (b) aPt/Mo<sub>x</sub>C, (c) aIr/Mo<sub>x</sub>C, (d) aPd/Mo<sub>x</sub>C, (e) aRh/Mo<sub>x</sub>C, (f) aAg/Mo<sub>x</sub>C, and (g) aAu/Mo<sub>x</sub>C.

SEM images demonstrated that Mo<sub>x</sub>C NPs were evenly dispersed at mesoporous heterostructured Mo<sub>x</sub>C-C, regardless of type of NM precursor.

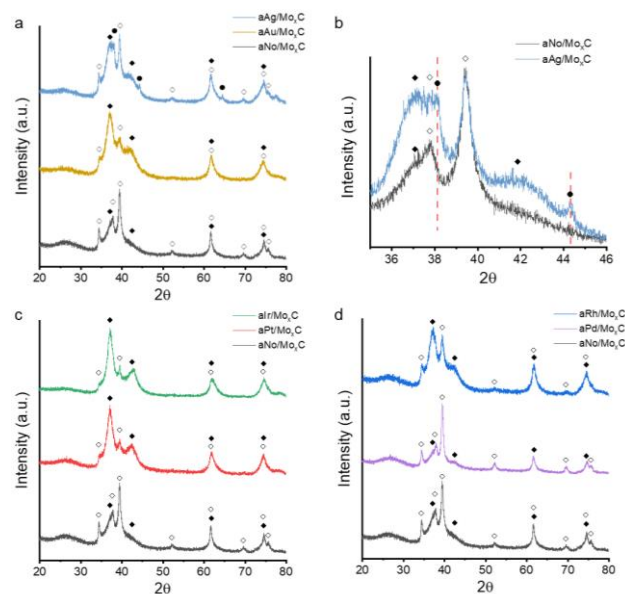

**Fig. S20** XRD patterns for aNM/Mo<sub>x</sub>C. XRD patterns for aNM/Mo<sub>x</sub>C for (a) aAg/Mo<sub>x</sub>C and aAu/Mo<sub>x</sub>C, (c) aIr/Mo<sub>x</sub>C and aPt/Mo<sub>x</sub>C, and (d) aRh/Mo<sub>x</sub>C and aPd/Mo<sub>x</sub>C with enlarged XRD patterns for (b) aAg/Mo<sub>x</sub>C to show the crystalline Ag peak. (◆: α-MoC [JCPDS 01-089-2868], ◇: β-Mo<sub>2</sub>C [JCPDS 00-011-0608], ●: Ag [JCPDS 04-0783])

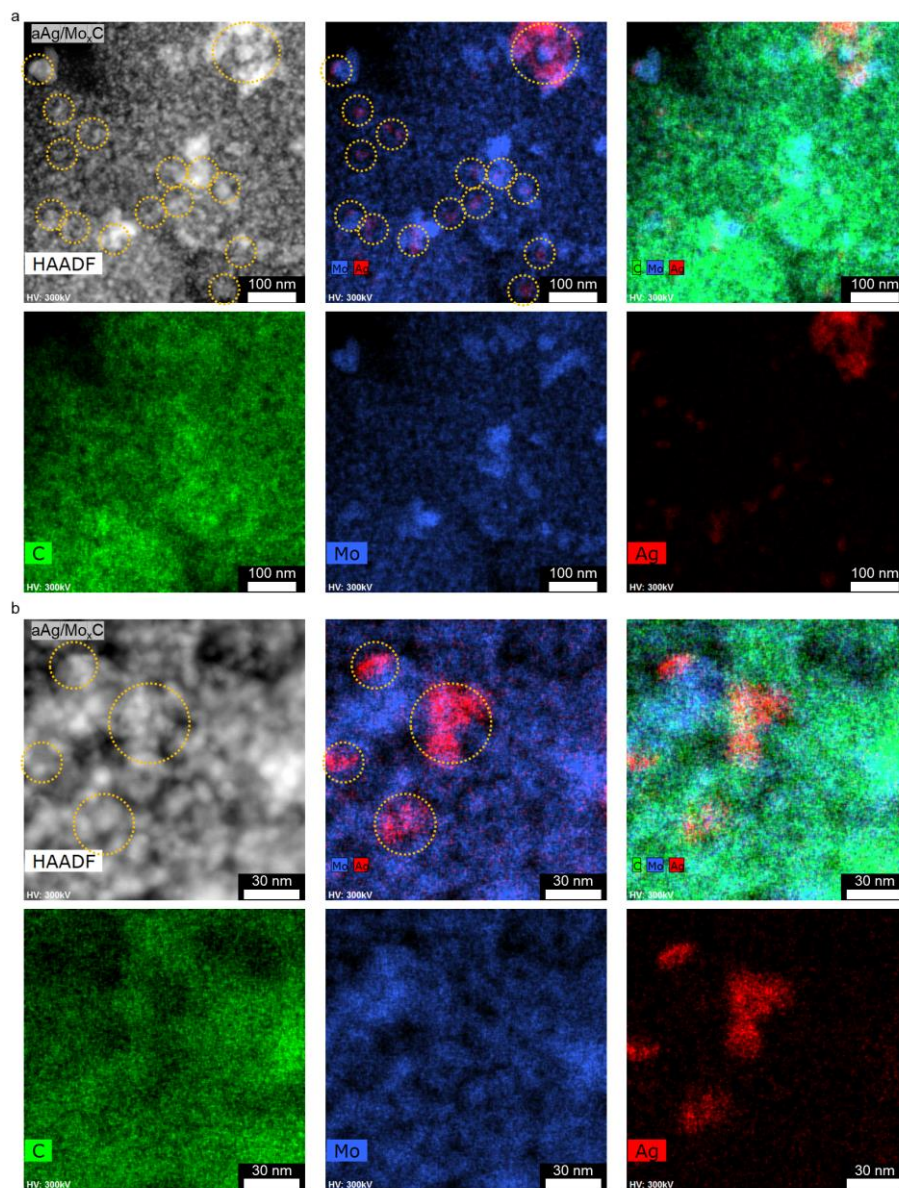

**Fig. S21** STEM analysis for aAg/Mo<sub>x</sub>C. (a) HAADF-STEM images and corresponding EDS mappings, and (b) enlarged HAADF-STEM images and corresponding EDS mappings of aAg/Mo<sub>x</sub>C for C, Mo, Ag, and their overlap (red: Ag, blue: Mo, green: C, orange circles: Ag agglomerates),

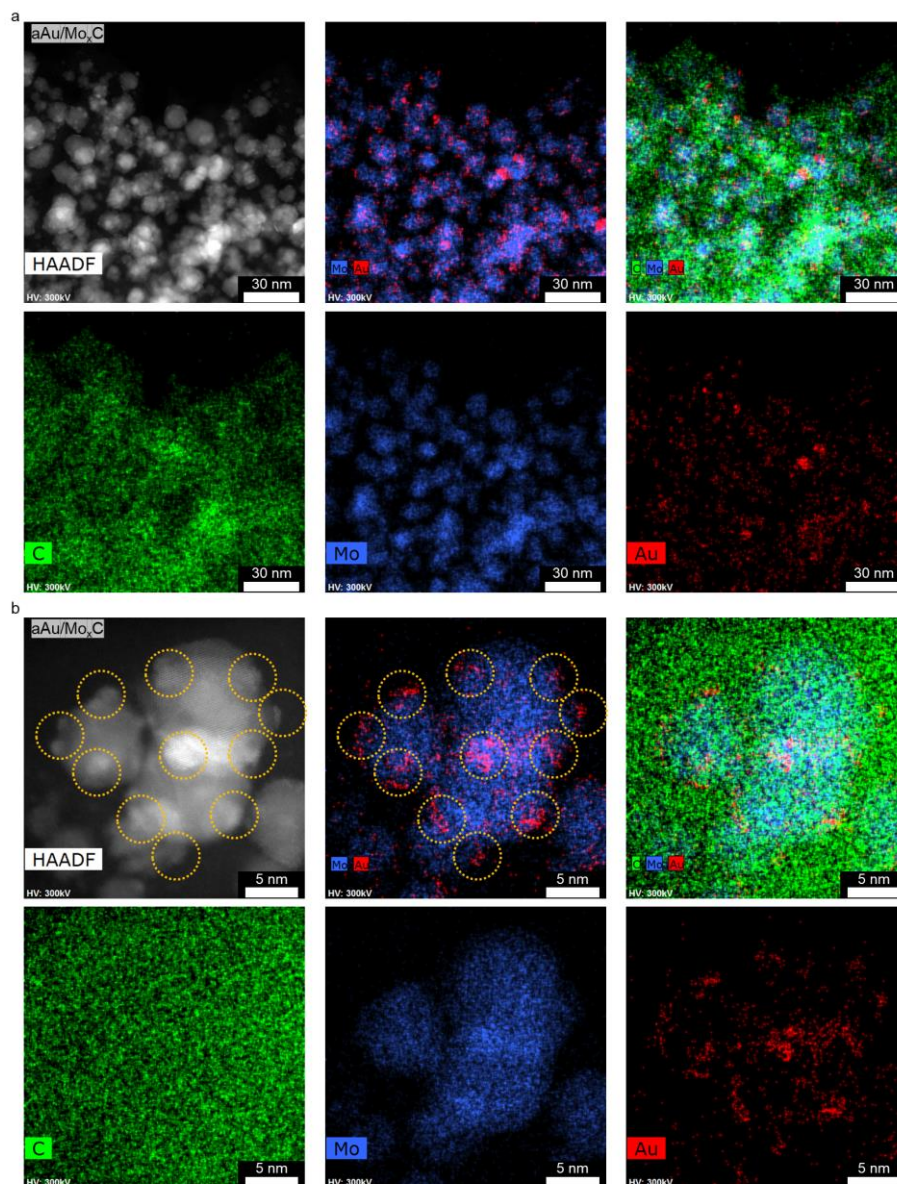

**Fig. S22** STEM analysis for aAu/Mo<sub>x</sub>C. (a) HAADF-STEM images and corresponding EDS mappings, and (b) enlarged HAADF-STEM images and corresponding EDS mappings of aAu/Mo<sub>x</sub>C for C, Mo, Au, and their overlap (red: Au, blue: Mo, green: C, orange circles: Au hemispheres),

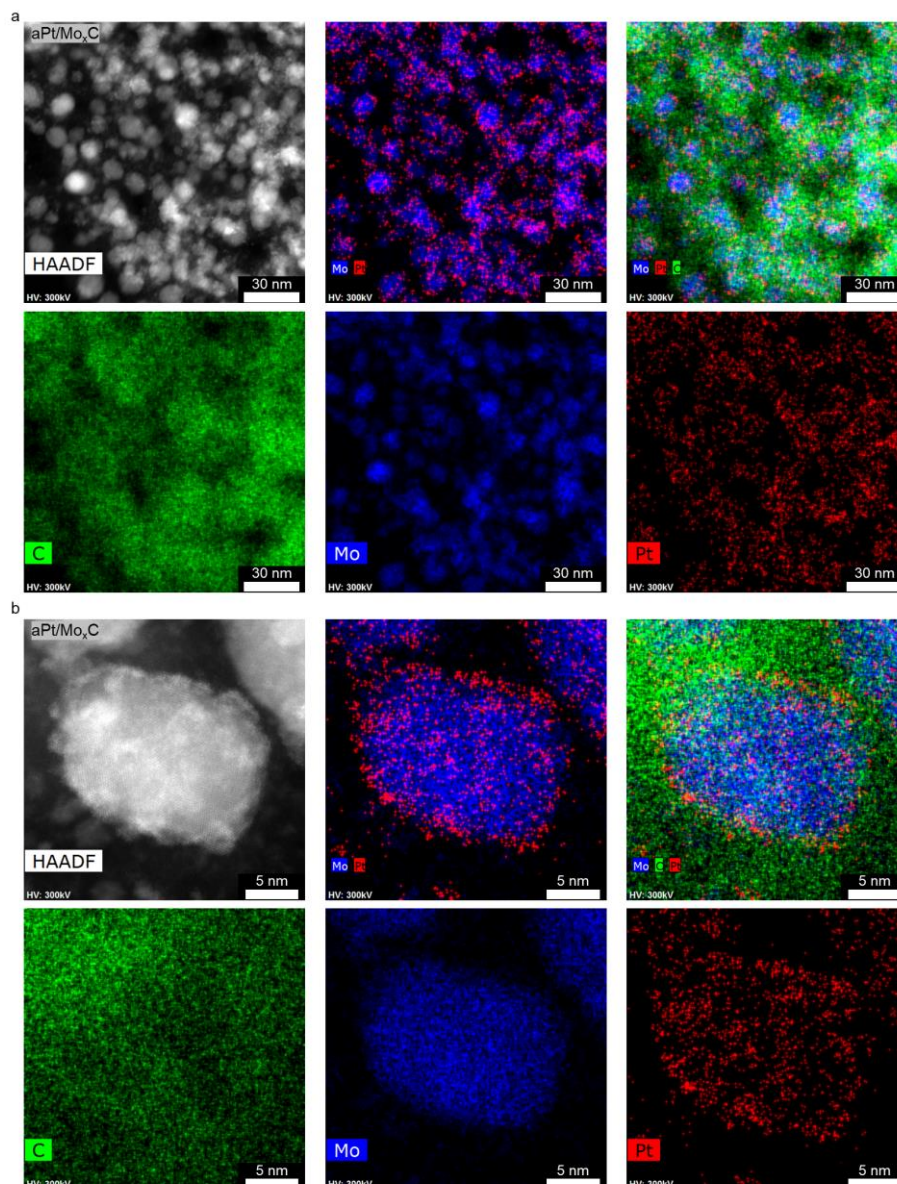

**Fig. S23** STEM analysis for aPt/Mo<sub>x</sub>C. (a) HAADF-STEM images and corresponding EDS mappings, and (b) enlarged HAADF-STEM images and corresponding EDS mappings of aPt/Mo<sub>x</sub>C for C, Mo, Pt, and their overlap (red: Pt, blue: Mo, green: C),

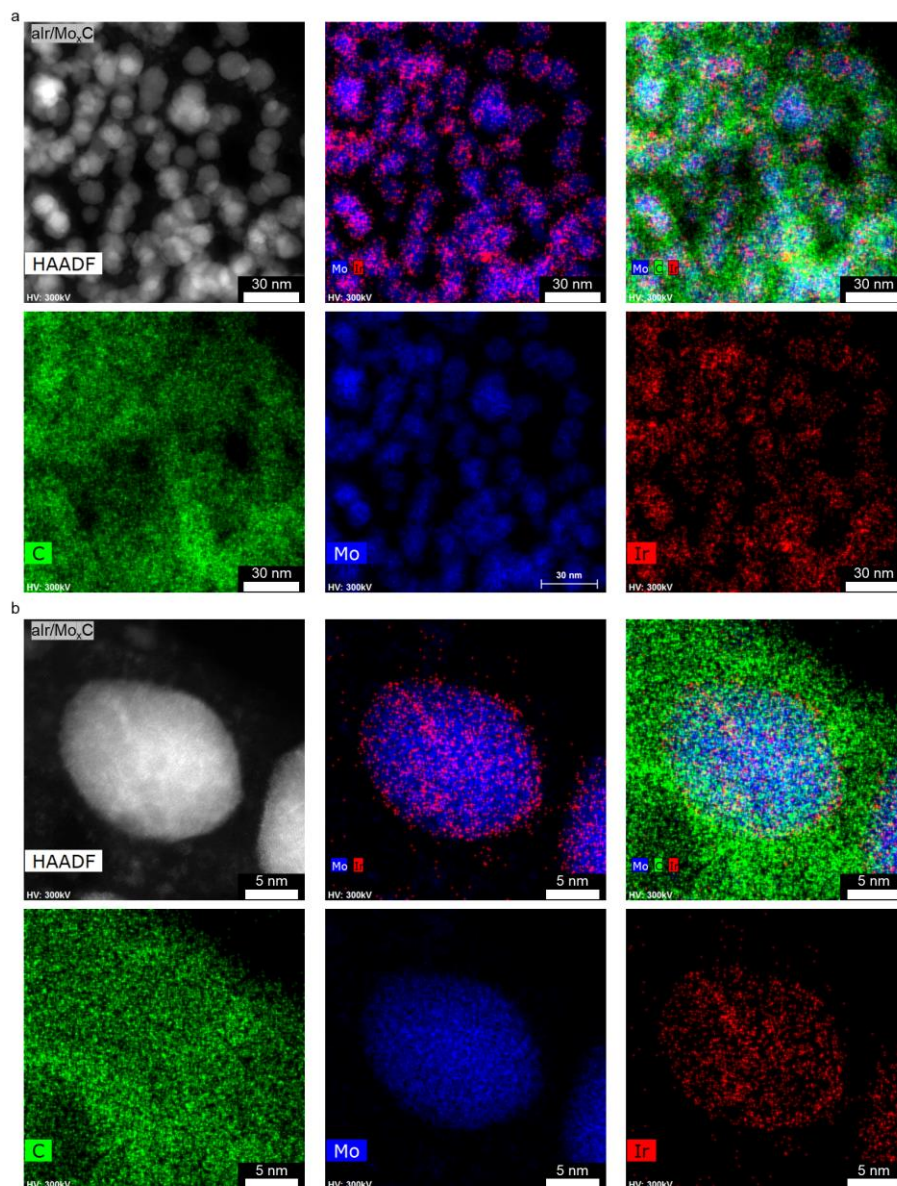

**Fig. S24** Enlarged STEM analysis for  $\text{alr/Mo}_x\text{C}$ . (a) HAADF-STEM images and corresponding EDS mappings, and (b) enlarged HAADF-STEM images and corresponding EDS mappings of  $\text{alr/Mo}_x\text{C}$  for C, Mo, Ir, and their overlap (red: Ir, blue: Mo, green: C),

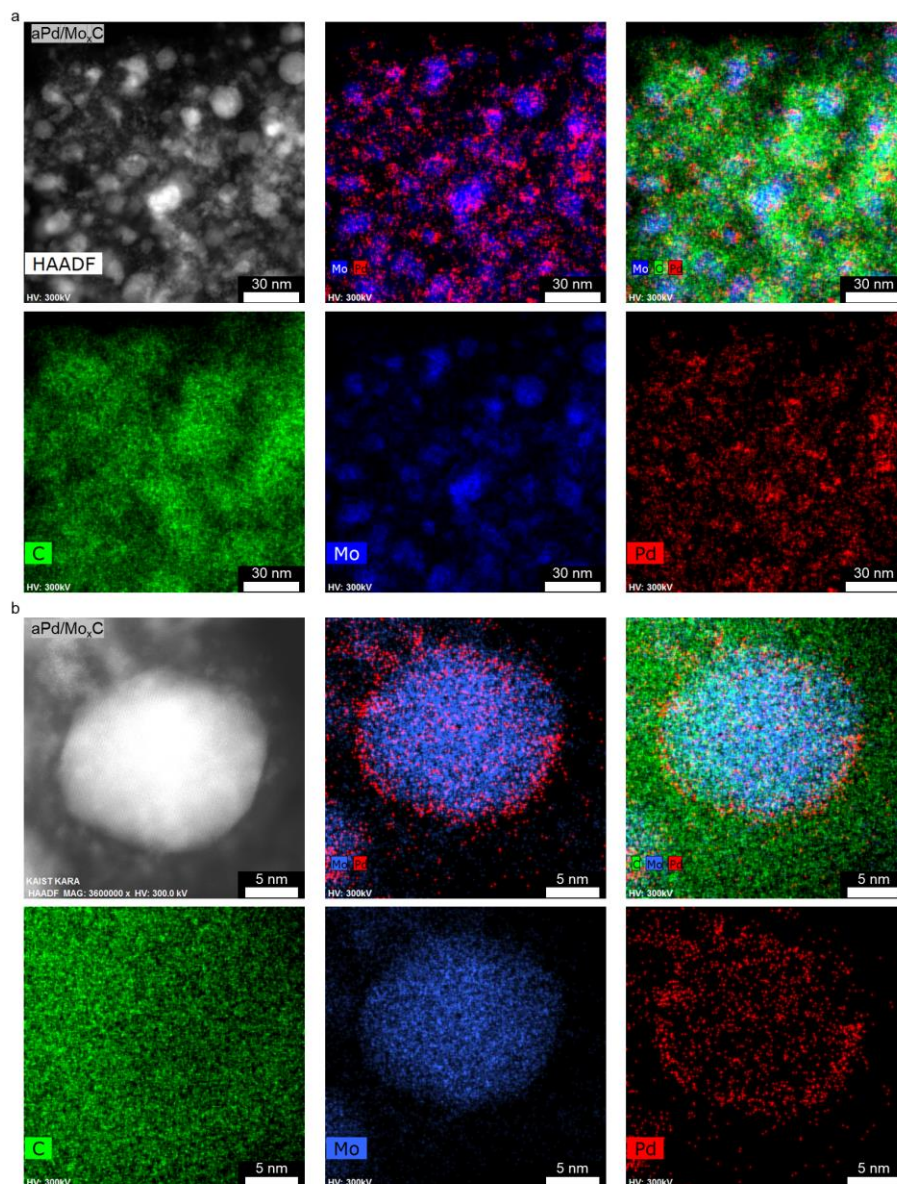

**Fig. S25** STEM analysis for aPd/Mo<sub>x</sub>C. (a) HAADF-STEM images and corresponding EDS mappings, and (b) enlarged HAADF-STEM images and corresponding EDS mappings of aPd/Mo<sub>x</sub>C for C, Mo, Pd, and their overlap (red: Pd, blue: Mo, green: C),

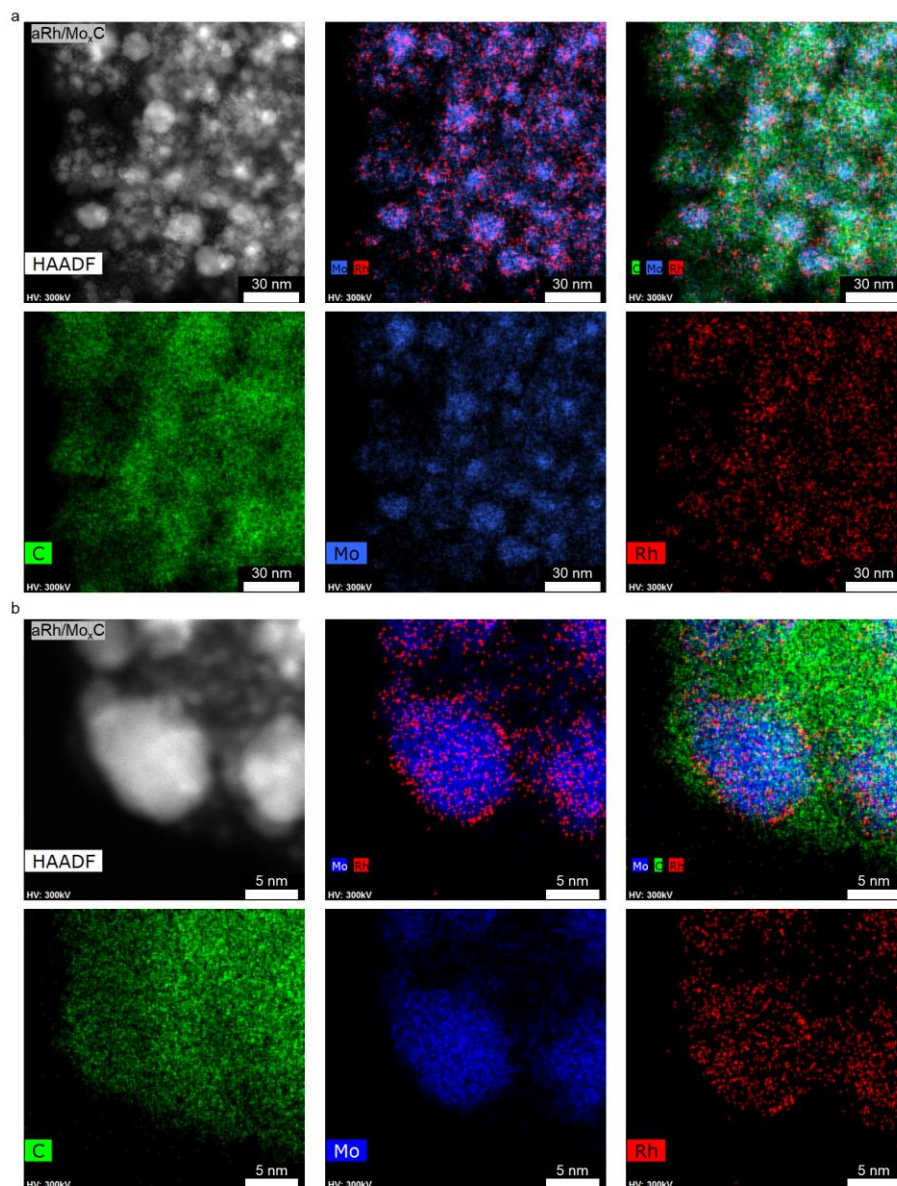

**Fig. S26** STEM analysis for aRh/Mo<sub>x</sub>C. (a) HAADF-STEM images and corresponding EDS mappings, and (b) enlarged HAADF-STEM images and corresponding EDS mappings of aRh/Mo<sub>x</sub>C for C, Mo, Rh, and their overlap (red: Rh, blue: Mo, green: C),

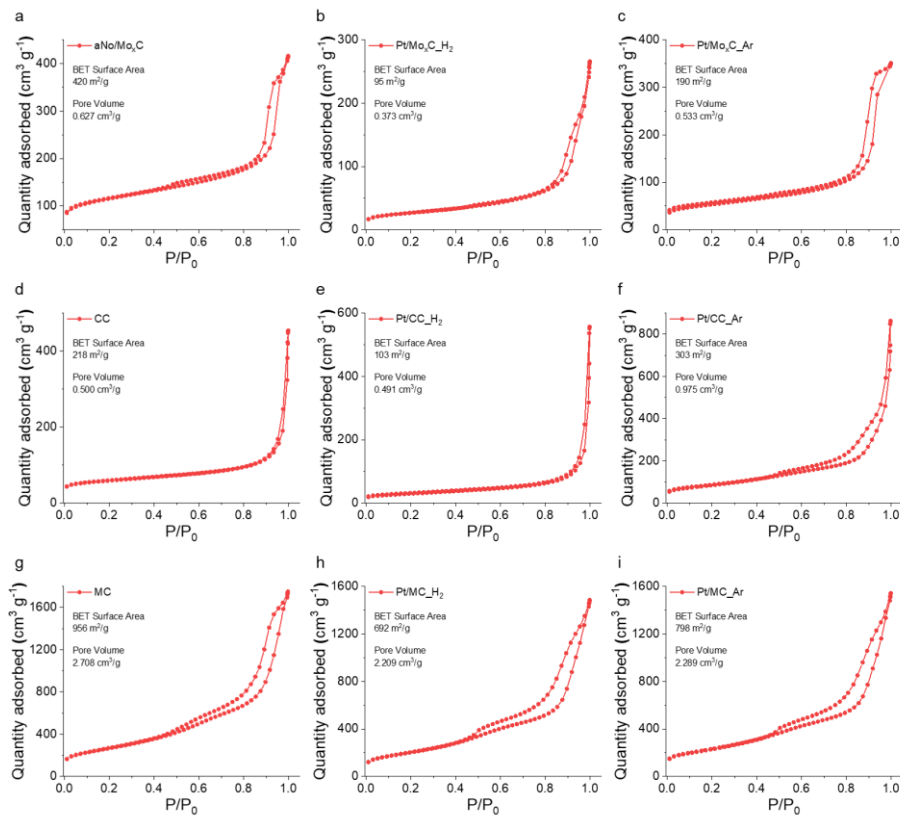

**Fig. S27** N<sub>2</sub> physisorption for Pt on support with different synthesis strategy. N<sub>2</sub> adsorption-desorption isotherms of support (a, d, g) and Pt loaded support, with low-*T* (373 K, 10% H<sub>2</sub>/Ar) reduction (b, e, h) and high-*T* (1,373 K, Ar) treatment (c, f, i) with BET surface area [m<sup>2</sup>·g<sup>-1</sup>] and pore volume [cm<sup>3</sup>·g<sup>-1</sup>]. (a) aNo/Mo<sub>x</sub>C, (b) Pt/Mo<sub>x</sub>C\_H<sub>2</sub>, (c) Pt/Mo<sub>x</sub>C\_Ar, (d) CC, (e) Pt/CC\_H<sub>2</sub>, (f) Pt/CC\_Ar, (g) MC, (h) Pt/MC\_H<sub>2</sub>, and (i) Pt/MC\_Ar.

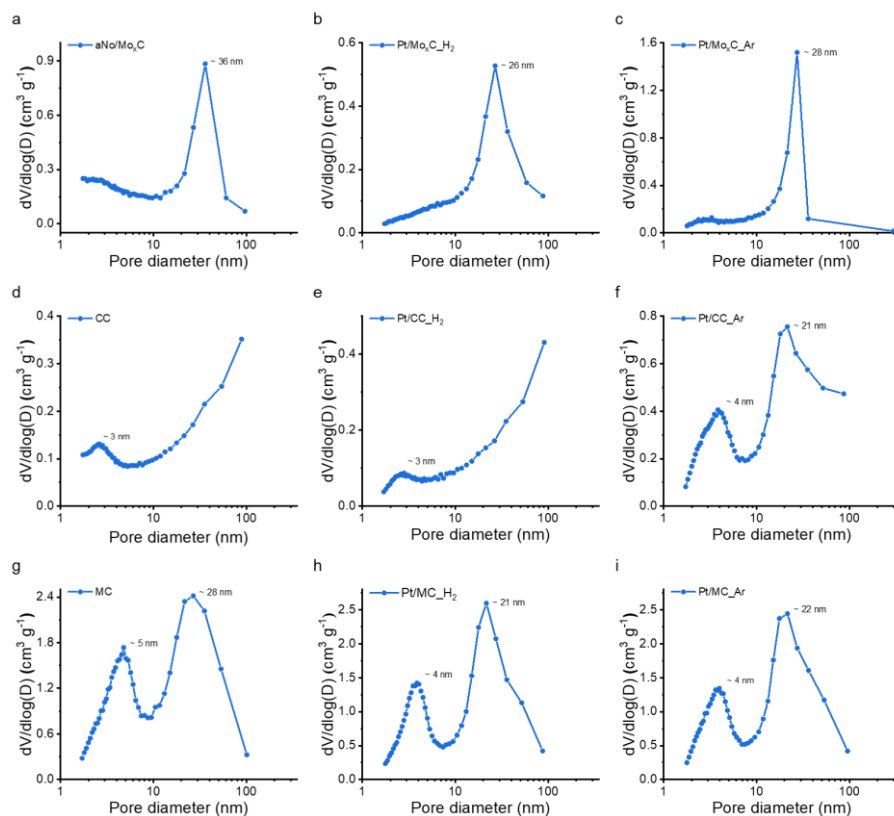

**Fig. S28** Pore size distribution for Pt on support with different synthesis strategy. Pore size distribution from N<sub>2</sub> adsorption-desorption isotherms of support (a, d, g) and Pt loaded support, with low-*T* (373 K, 10% H<sub>2</sub>/Ar) reduction (b, e, h) and high-*T* (1,373 K, Ar) treatment (c, f, i) with pore size (nm). (a) aNo/Mo<sub>x</sub>C, (b) Pt/Mo<sub>x</sub>C<sub>H<sub>2</sub></sub>, (c) Pt/Mo<sub>x</sub>C<sub>Ar</sub>, (d) CC, (e) Pt/CC<sub>H<sub>2</sub></sub>, (f) Pt/CC<sub>Ar</sub>, (g) MC, (h) Pt/MC<sub>H<sub>2</sub></sub>, and (i) Pt/MC<sub>Ar</sub>.

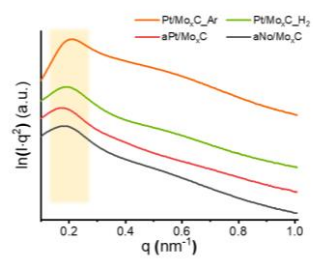

**Fig. S29** Small-angle X-ray scattering patterns for Pt on Mo<sub>x</sub>C-C with different synthesis strategy. SAXS patterns of aNo/Mo<sub>x</sub>C, aPt/Mo<sub>x</sub>C, Pt/Mo<sub>x</sub>C<sub>H<sub>2</sub></sub>, and Pt/Mo<sub>x</sub>C<sub>Ar</sub>.

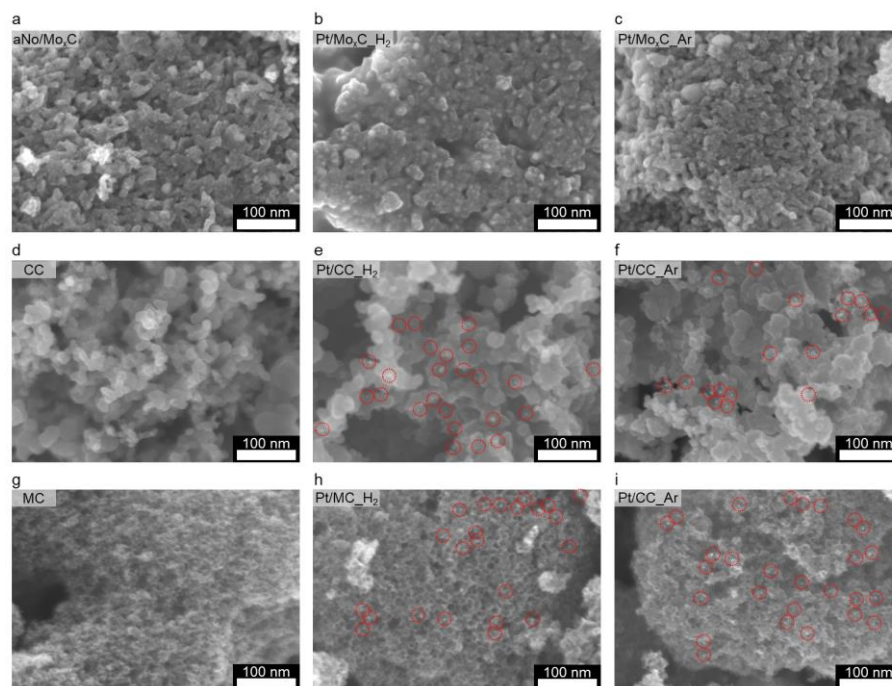

**Fig. S30** SEM images of Pt on support with different synthesis strategy. SEM images of (a) aNo/Mo<sub>x</sub>C, (b) Pt/Mo<sub>x</sub>C\_H<sub>2</sub>, (c) Pt/Mo<sub>x</sub>C\_Ar, (d) CC, (e) Pt/CC\_H<sub>2</sub>, (f), Pt/CC\_Ar, (g) MC, (h) Pt/MC\_H<sub>2</sub>, (i) Pt/MC\_Ar (red circle: large Pt particles).

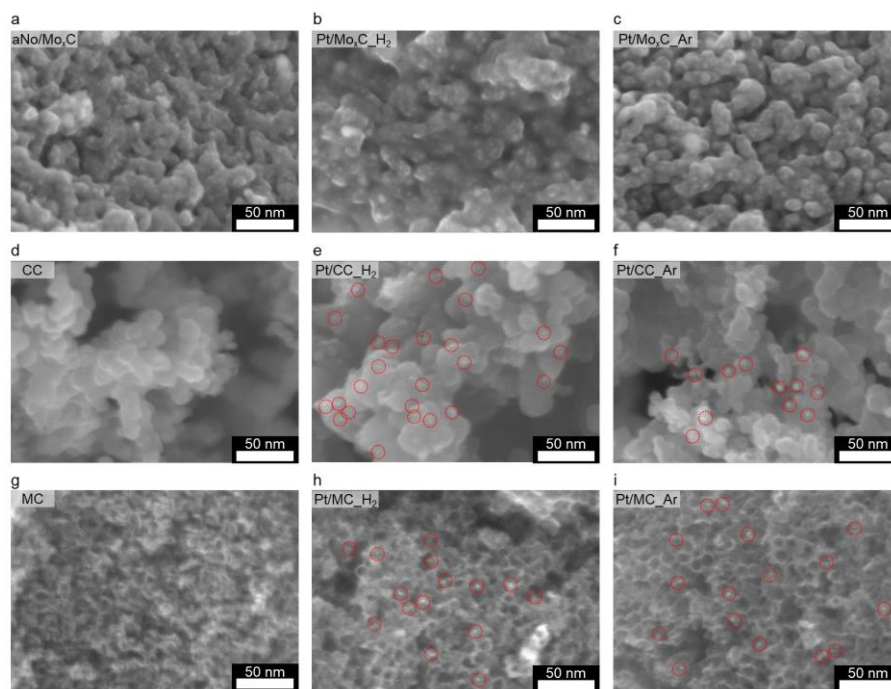

**Fig. S31** Enlarged SEM images of Pt on support with different synthesis strategy. Enlarged SEM images of (a) aNo/Mo<sub>x</sub>C, (b) Pt/Mo<sub>x</sub>C\_H<sub>2</sub>, (c) Pt/Mo<sub>x</sub>C\_Ar, (d) CC, (e) Pt/CC\_H<sub>2</sub>, (f) Pt/CC\_Ar, (g) MC, (h) Pt/MC\_H<sub>2</sub>, (i) Pt/MC\_Ar (red circle: large Pt particles).

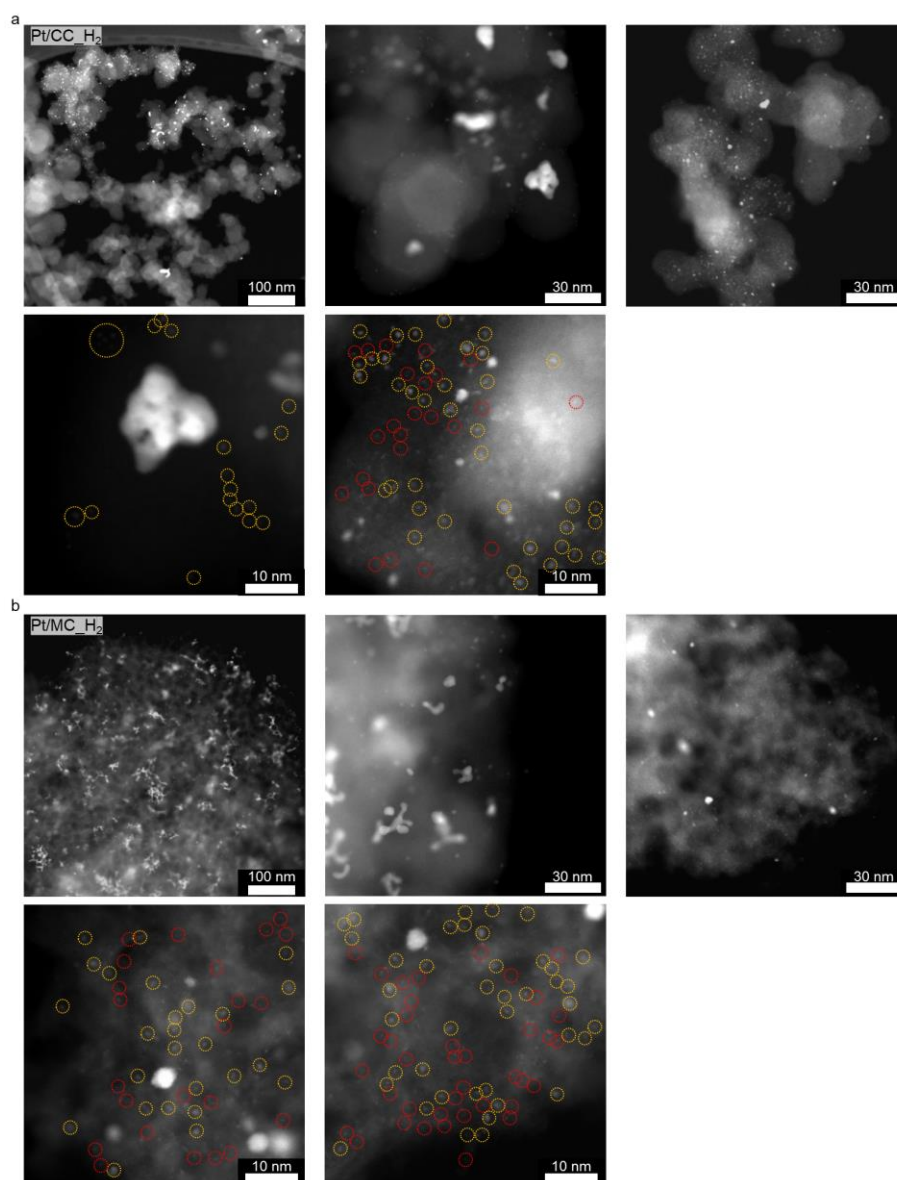

**Fig. S32** STEM analysis of Pt/CC\_H<sub>2</sub> and Pt/MC\_H<sub>2</sub>. STEM images of (a) Pt/CC\_H<sub>2</sub> and (b) Pt/MC\_H<sub>2</sub> at different magnifications (red circle: single-atom Pt, orange circle: Pt atomic cluster).

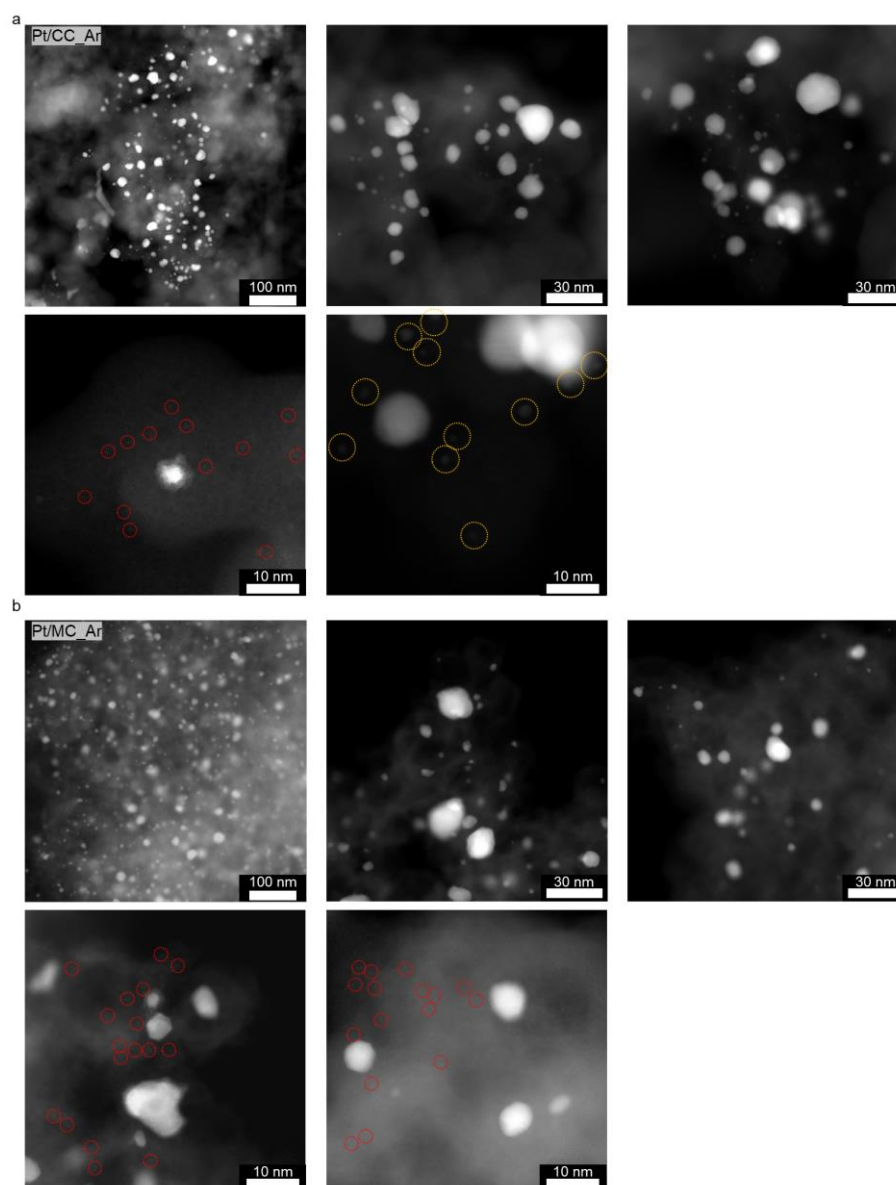

**Fig. S33** STEM analysis of Pt/CC\_Ar and Pt/MC\_Ar. STEM images of (a) Pt/CC\_Ar and (b) Pt/MC\_Ar at different magnifications (red circle: single-atom Pt, orange circle: Pt atomic cluster).

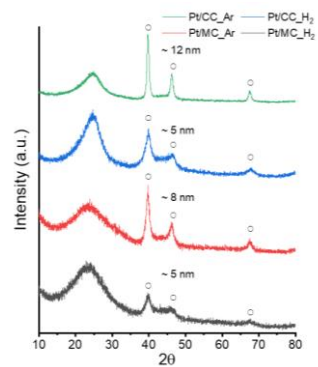

**Fig. S34** XRD patterns of Pt on carbon support with different synthesis strategy. XRD patterns for Pt/CC\_Ar (green), Pt/CC\_H<sub>2</sub> (blue), Pt/MC\_Ar (red), and Pt/MC\_H<sub>2</sub> (black) with crystallite sizes calculated using the Scherrer equation. (○: Pt [JCPDS 04-0802])

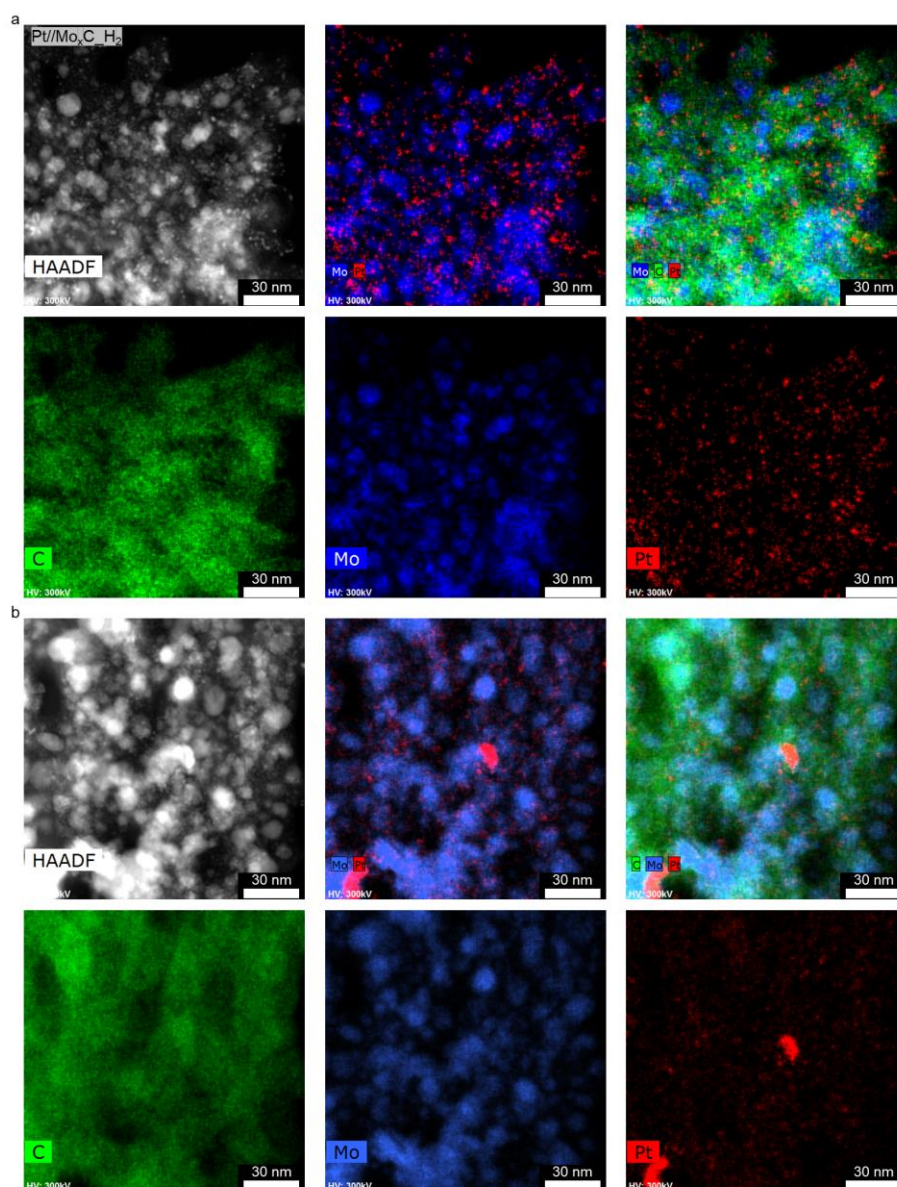

**Fig. S35** STEM analysis of Pt/Mo<sub>x</sub>C<sub>H2</sub>. STEM images and corresponding EDS mappings of Pt/Mo<sub>x</sub>C<sub>H2</sub> (red: Pt, blue: Mo, green: C).

From the EDS mapping, Pt nanoclusters were mainly distributed on carbon (Fig. S35a), which is not overlapped on Mo, and some large Pt clusters were observed (Fig. S35b), which results from the uneven loading of Pt with wet impregnation.

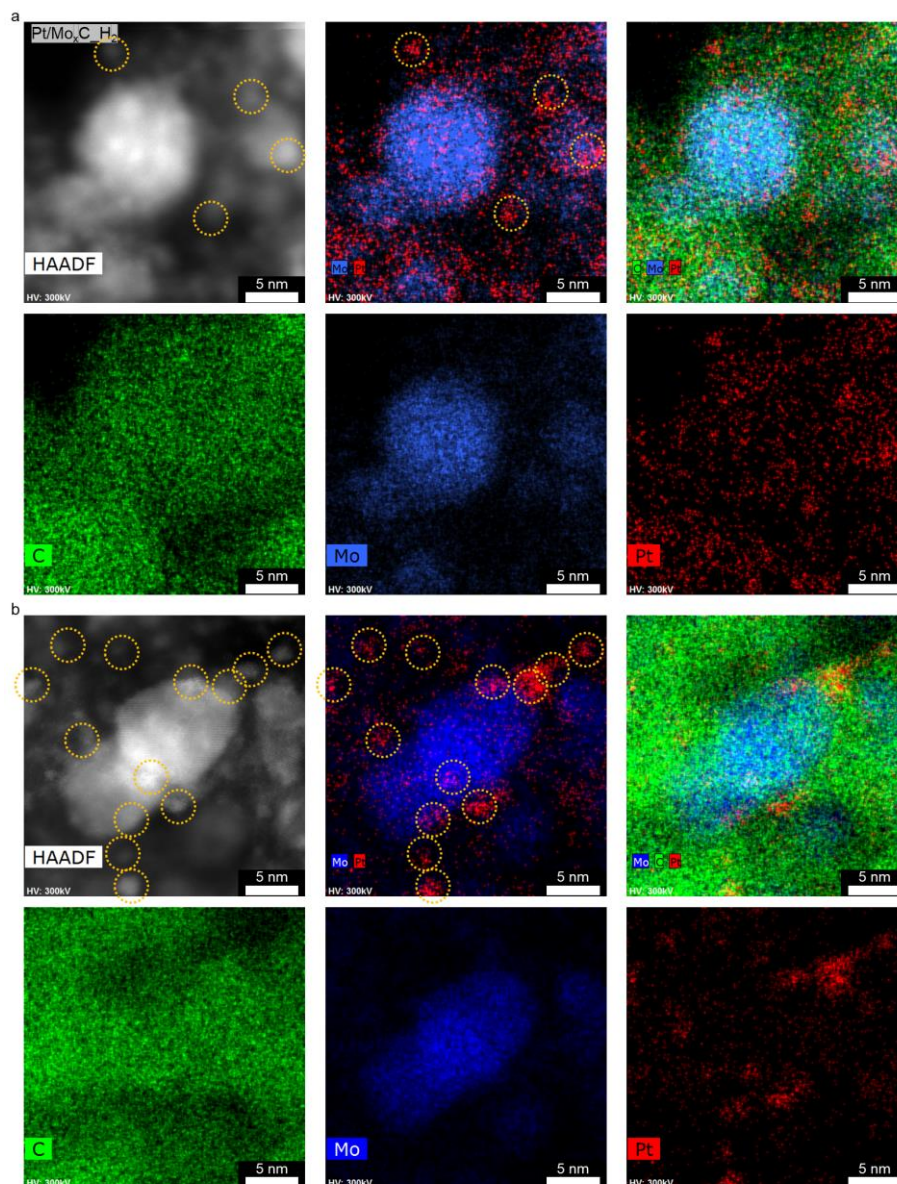

**Fig. S36** Enlarged STEM analysis of Pt/Mo<sub>x</sub>C<sub>1-x</sub>H<sub>2</sub>. Enlarged STEM images and corresponding EDS mappings of Pt/Mo<sub>x</sub>C<sub>1-x</sub>H<sub>2</sub> (red: Pt, blue: Mo, green: C, yellow circles: Pt clusters).

From the EDS mapping, Pt nanoclusters were mainly distributed on carbon (Fig. S36a), which is not overlapped on Mo, and Pt with atom-dimension structure were existed on carbon surface (Fig. S36b).

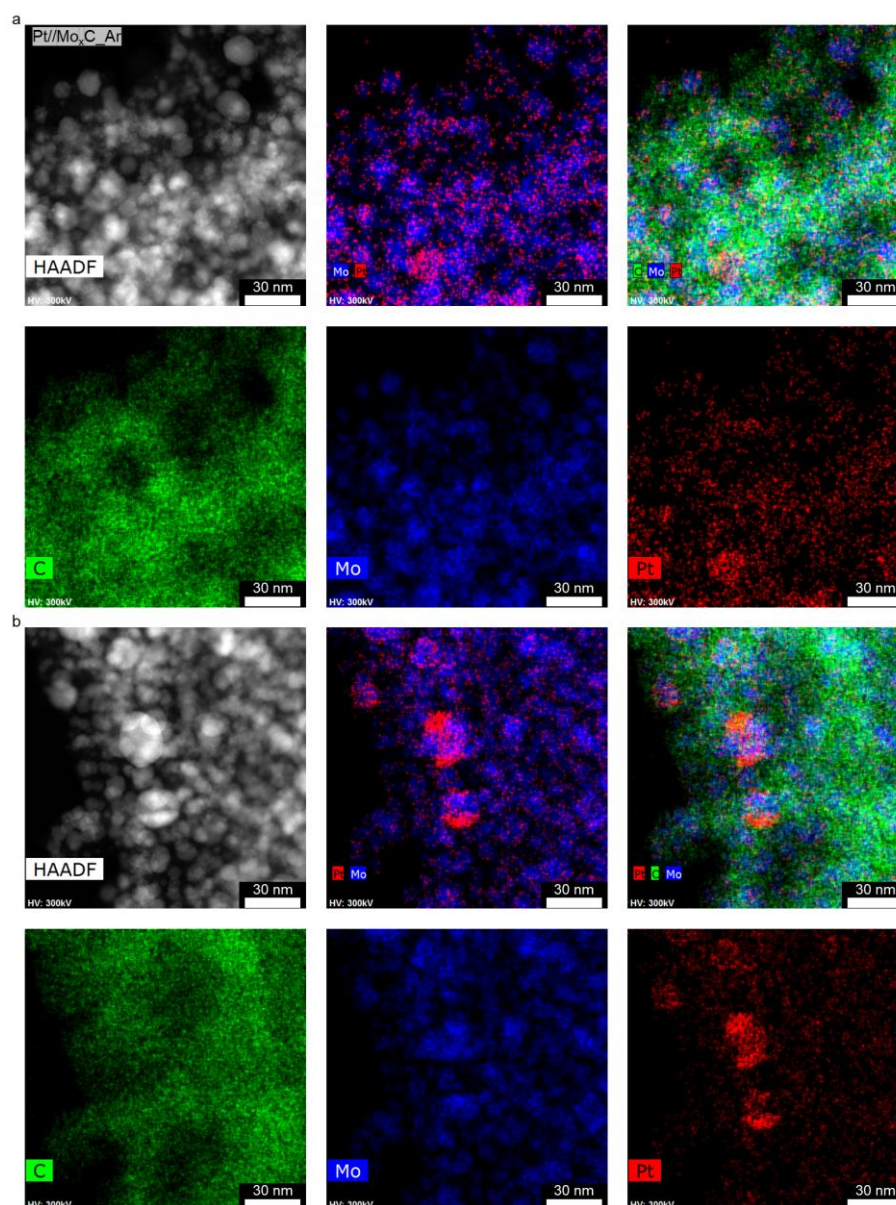

**Fig. S37** STEM analysis of Pt/Mo<sub>x</sub>C\_Ar. STEM images and corresponding EDS mappings of Pt/Mo<sub>x</sub>C\_Ar (red: Pt, blue: Mo, green: C).

From the EDS mapping, Pt ADCs were distributed selectively on Mo<sub>x</sub>C (Fig. S37a), and some large Pt clusters were observed (Fig. S37b), which results from the uneven loading of Pt with wet impregnation.

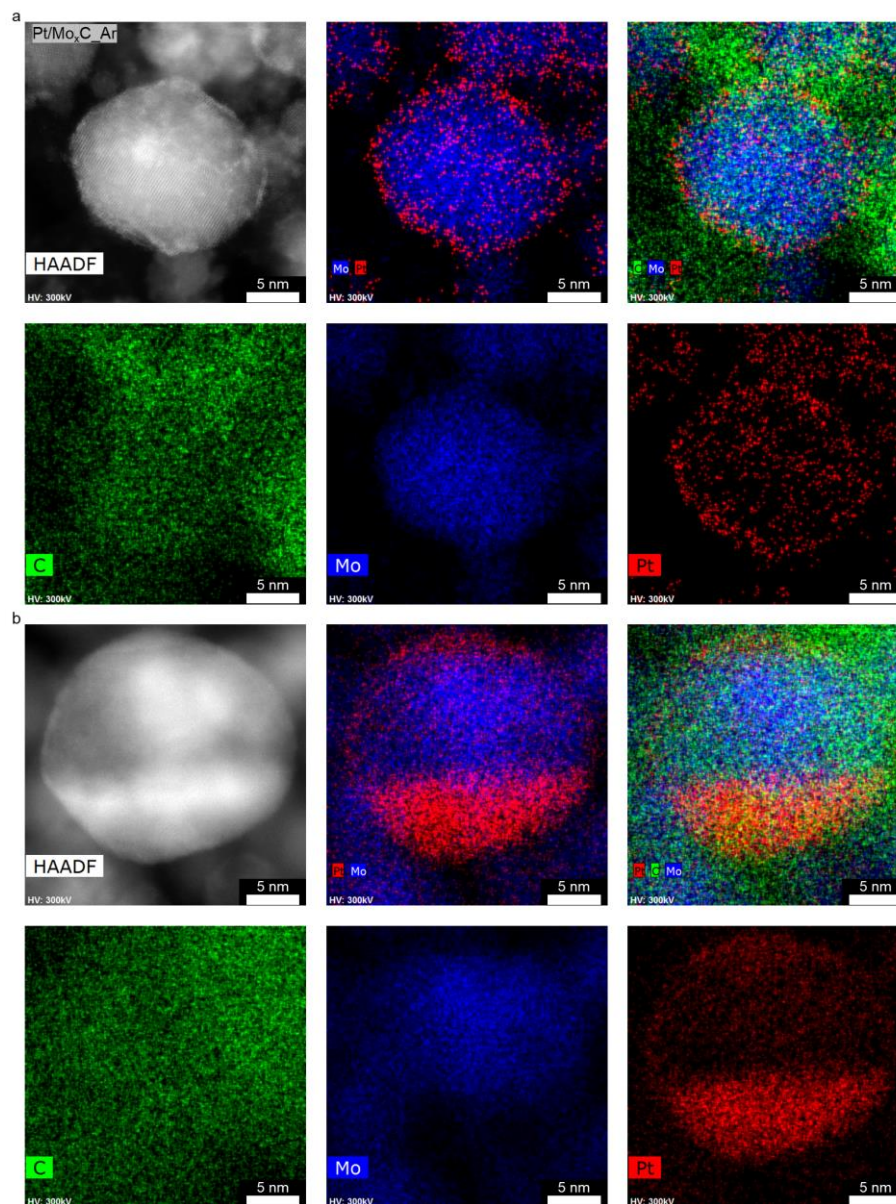

**Fig. S38** Enlarged STEM analysis of Pt/Mo<sub>x</sub>C\_Ar. Enlarged STEM images and corresponding EDS mappings of Pt/Mo<sub>x</sub>C\_Ar (red: Pt, blue: Mo, green: C).

From the EDS mapping, crystalline Pt was segregated out on Mo<sub>x</sub>C NPs (Fig. S38a), which results from the uneven loading of Pt with wet impregnation, and a shell-like Pt distribution on Mo<sub>x</sub>C surface (Fig. S38b), which indicates that dynamic placement of Pt selectively on Mo<sub>x</sub>C surface occurs.

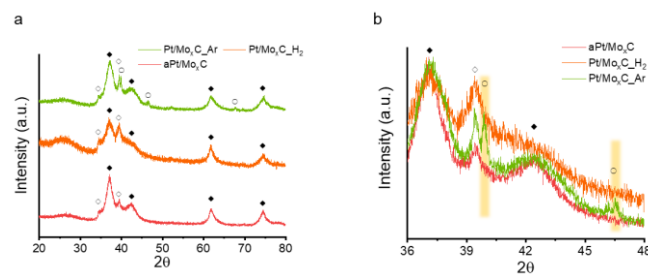

**Fig. S39** XRD patterns of Pt/Mo<sub>x</sub>C-C with different synthesis strategy. (a) XRD patterns for aPt/Mo<sub>x</sub>C (red), Pt/Mo<sub>x</sub>C<sub>H<sub>2</sub></sub> (orange), and Pt/Mo<sub>x</sub>C<sub>Ar</sub> (yellow green), and (b) enlarged XRD patterns to distinguish the crystalline Pt species. (◆: α-MoC [JCPDS 01-089-2868], ◇: β-Mo<sub>2</sub>C [JCPDS 00-011-0608], ○: Pt [JCPDS 04-0802])

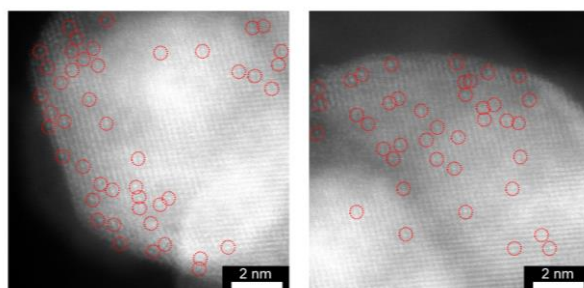

**Fig. S40** Z-contrast images of Pt/Mo<sub>x</sub>C\_Ar. HAADF-STEM images of Pt/Mo<sub>x</sub>C\_Ar (red circle: single-atom Pt)

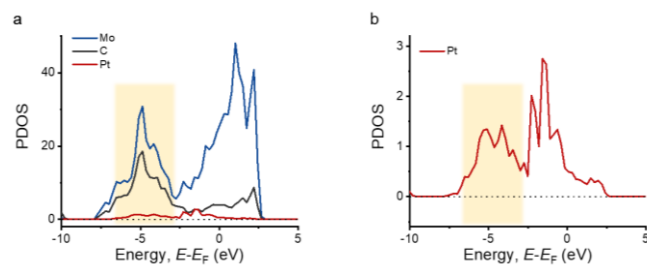

**Fig. S41** Theoretical calculation of electronic structure for aPt/Mo<sub>x</sub>C. Partial density of state (PDOS) of (a) aPt/Mo<sub>x</sub>C for Pt (red), Mo (blue), and C (black), and (b) enlarged PDOS of aPt/Mo<sub>x</sub>C for Pt (red) obtained using DFT calculation (yellow region: DOS from hybridized Mo and C states).

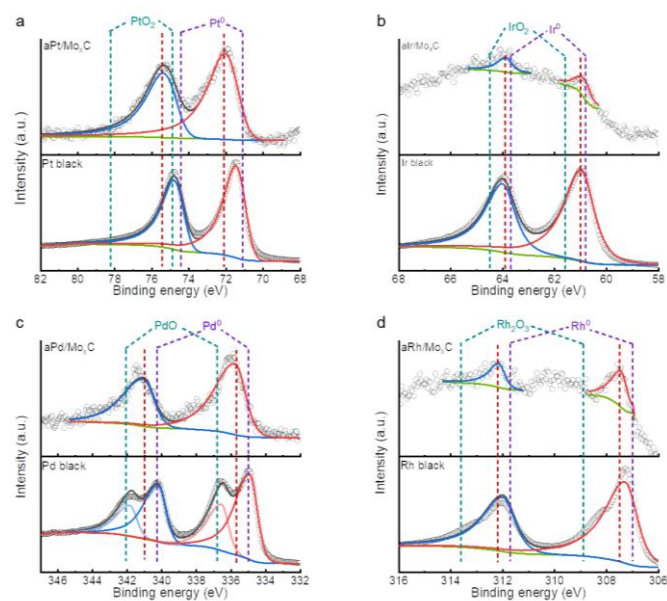

**Fig. S42** X-ray photoelectron spectroscopy (XPS) of aNM/Mo<sub>x</sub>C with NM black. XPS of (a) Pt 4f region for aPt/Mo<sub>x</sub>C and Pt black, (b) Ir 4f region for aIr/Mo<sub>x</sub>C and Ir black, (c) Pd 3d region for aPd/Mo<sub>x</sub>C and Pd black, and (d) Rh 3d region for aRh/Mo<sub>x</sub>C and Rh black.

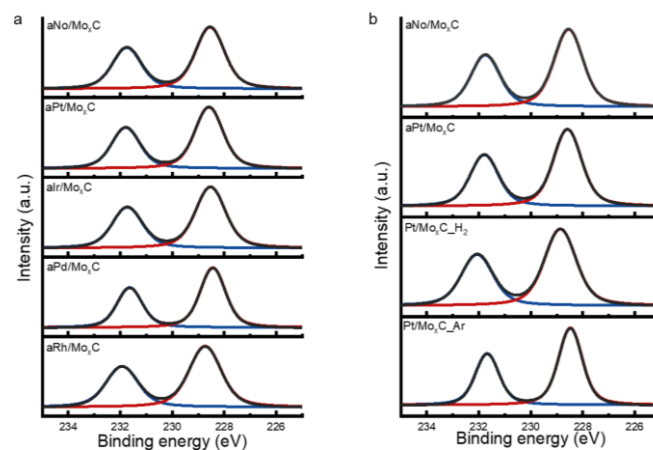

**Fig. S43** XPS of aNM/Mo<sub>x</sub>C for Mo 3d region. Extraction of Mo<sub>x</sub>C spectrum in XPS of Mo 3d region according to (a) type of NM (aNo/Mo<sub>x</sub>C, aPt/Mo<sub>x</sub>C, aIr/Mo<sub>x</sub>C, aPd/Mo<sub>x</sub>C, and aRh/Mo<sub>x</sub>C), and (b) synthesis strategy (aNo/Mo<sub>x</sub>C, aPt/Mo<sub>x</sub>C, Pt/Mo<sub>x</sub>C<sub>H<sub>2</sub></sub>, and Pt/Mo<sub>x</sub>C<sub>Ar</sub>).

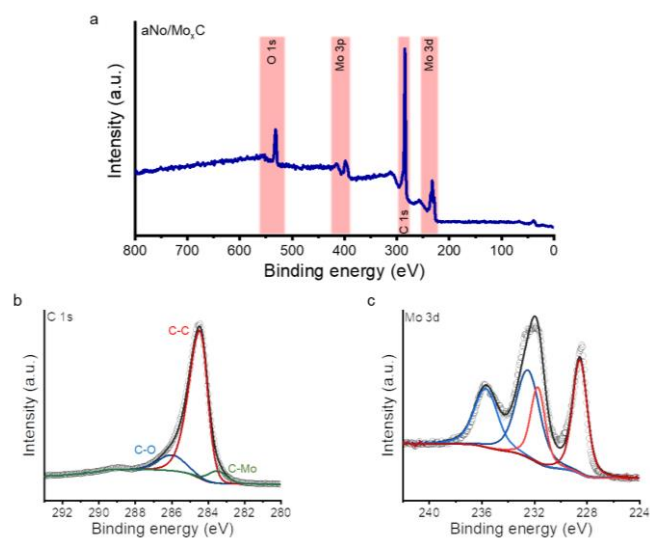

**Fig. S44** XPS analysis of aNo/Mo<sub>x</sub>C. XPS measurement of aNo/Mo<sub>x</sub>C. (a) XPS survey spectrum, (b) C 1s region (green: C-Mo, red: C=C, blue: C-O), and (c) Mo 3d region of XPS (red: Mo<sub>x</sub>C, blue: surface MoO<sub>x</sub> due to naturally-formed oxide).

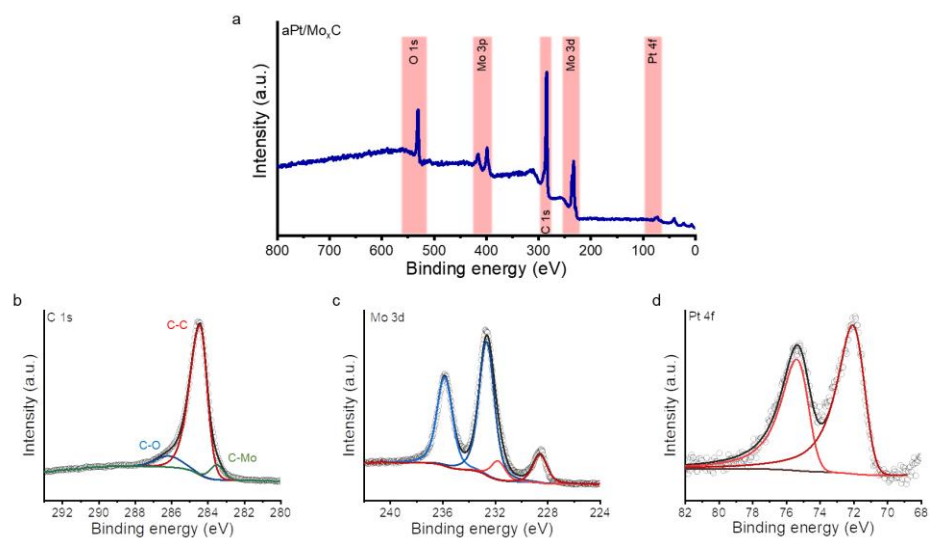

**Fig. S45** XPS analysis of aPt/Mo<sub>x</sub>C. XPS measurement of aPt/Mo<sub>x</sub>C. (a) XPS survey spectrum, (b) C 1s region (green: C-Mo, red: C=C, blue: C-O), (c) Mo 3d region of XPS (red: Mo<sub>x</sub>C, blue: surface MoO<sub>x</sub> due to naturally formed oxide), and (d) Pt 4f region of XPS.

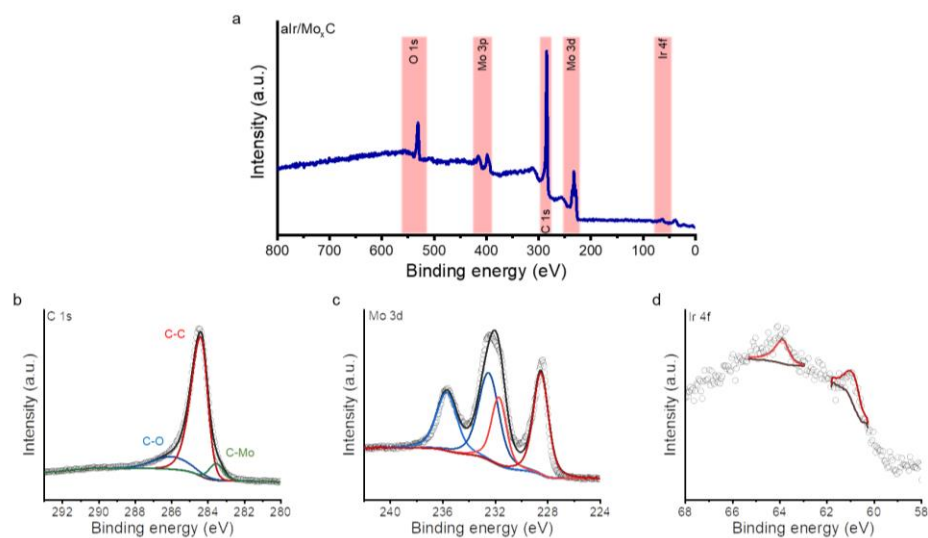

**Fig. S46** XPS analysis of alr/Mo<sub>x</sub>C. XPS measurement of alr/Mo<sub>x</sub>C. (a) XPS survey spectrum, (b) C 1s region (green: C-Mo, red: C=C, blue: C-O), (c) Mo 3d region of XPS (red: Mo<sub>x</sub>C, blue: surface MoO<sub>x</sub> due to naturally-formed oxide), and (d) Ir 4f region of XPS.

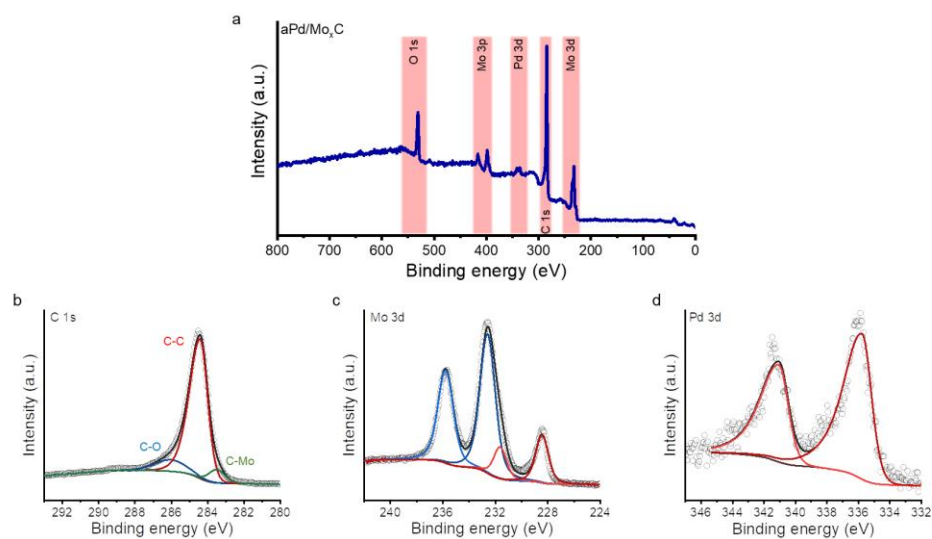

**Fig. S47** XPS analysis of aPd/Mo<sub>x</sub>C. XPS measurement of aPd/Mo<sub>x</sub>C. (a) XPS survey spectrum, (b) C 1s region (green: C-Mo, red: C=C, blue: C-O), (c) Mo 3d region of XPS (red: Mo<sub>x</sub>C, blue: surface MoO<sub>x</sub> due to naturally formed oxide), and (d) Pd 3d region of XPS.

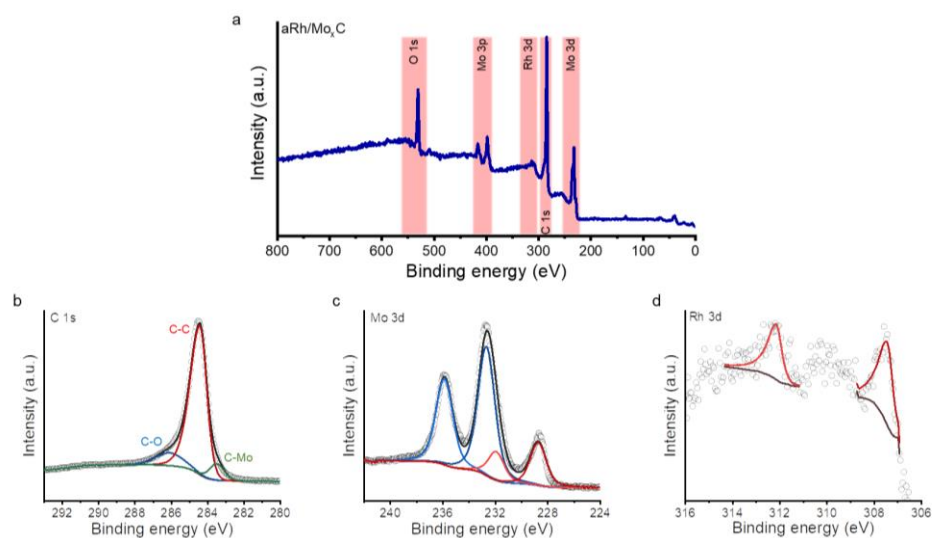

**Fig. S48** XPS analysis of aRh/Mo<sub>x</sub>C. XPS measurement of aRh/Mo<sub>x</sub>C. (a) XPS survey spectrum, (b) C 1s region (green: C-Mo, red: C=C, blue: C-O), (c) Mo 3d region of XPS (red: Mo<sub>x</sub>C, blue: surface MoO<sub>x</sub> due to naturally-formed oxide), and (d) Rh 3d region of XPS.

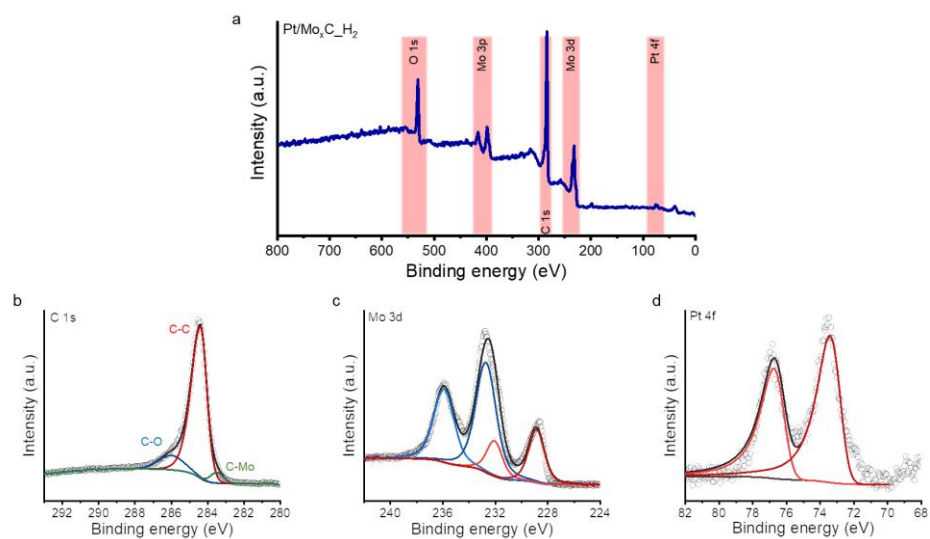

**Fig. S49** XPS analysis of Pt/Mo<sub>x</sub>C<sub>H2</sub>. XPS measurement of Pt/Mo<sub>x</sub>C<sub>H2</sub>. (a) XPS survey spectrum, (b) C 1s region (green: C-Mo, red: C=C, blue: C-O), (c) Mo 3d region of XPS (red: Mo<sub>x</sub>C, blue: surface MoO<sub>x</sub> due to naturally-formed oxide), and (d) Pt 4f region of XPS.

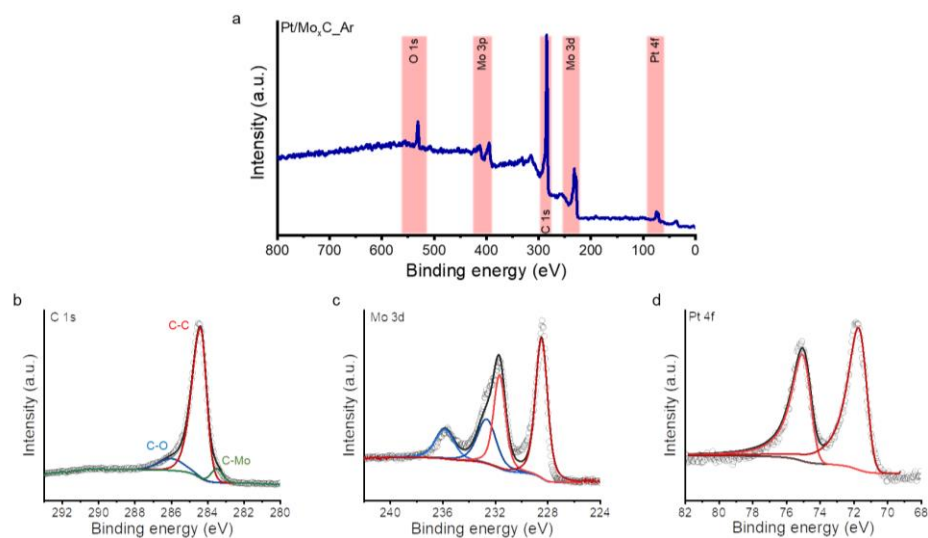

**Fig. S50** XPS analysis of Pt/Mo<sub>x</sub>C<sub>2</sub>Ar. XPS measurement of Pt/Mo<sub>x</sub>C<sub>2</sub>Ar. (a) XPS survey spectrum, (b) C 1s region (green: C-Mo, red: C=C, blue: C-O), (c) Mo 3d region of XPS (red: Mo<sub>x</sub>C, blue: surface MoO<sub>x</sub> due to naturally-formed oxide), and (d) Pt 4f region of XPS.

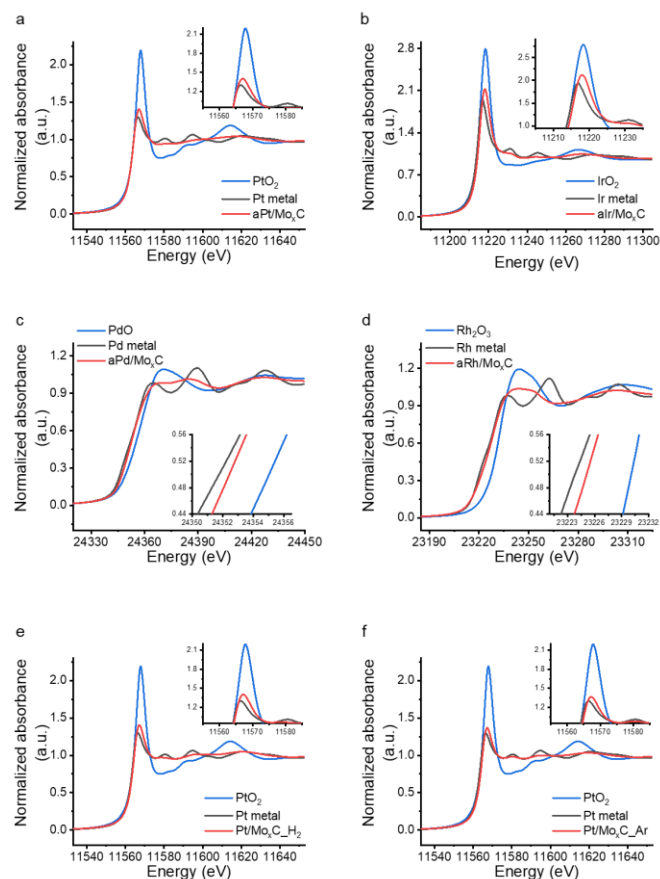

**Fig. S51** X-ray absorption near-edge structure (XANES) spectra of the electrocatalysts. XANES spectra of (a-d) aNM/Mo<sub>x</sub>C, (e) Pt/Mo<sub>x</sub>C-H<sub>2</sub>, and (f) Pt/Mo<sub>x</sub>C-Ar at the (a, e, f) Pt L<sub>3</sub>-edge, (b) Ir L<sub>3</sub>-edge, (c) Pd K-edge, and (d) Rh K-edge for NM oxide (blue), NM foil (black), and aNM/Mo<sub>x</sub>C (red).

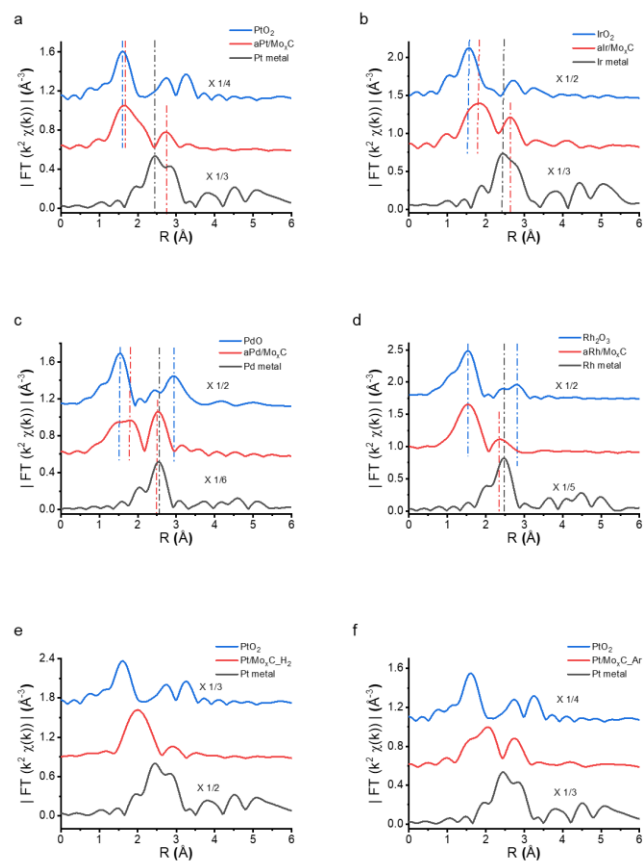

**Fig. S52**  $k^2$ -weighted extended X-ray absorption fine structure (EXAFS) Fourier-transform magnitude in the  $R$  space ( $\chi(R)$ ) of aNM/Mo $_x$ C.  $k^2$ -weighted FT-EXAFS magnitude in the  $\chi(R)$  of (a-d) aNM/Mo $_x$ C, (e) Pt/Mo $_x$ C-H $_2$ , and (f) Pt/Mo $_x$ C-Ar at the (a, e, f) Pt L $_3$ -edge, (b) Ir L $_3$ -edge, (c) Pd K-edge, and (d) Rh K-edge for NM oxide (blue), NM foil (black), and aNM/Mo $_x$ C (red).

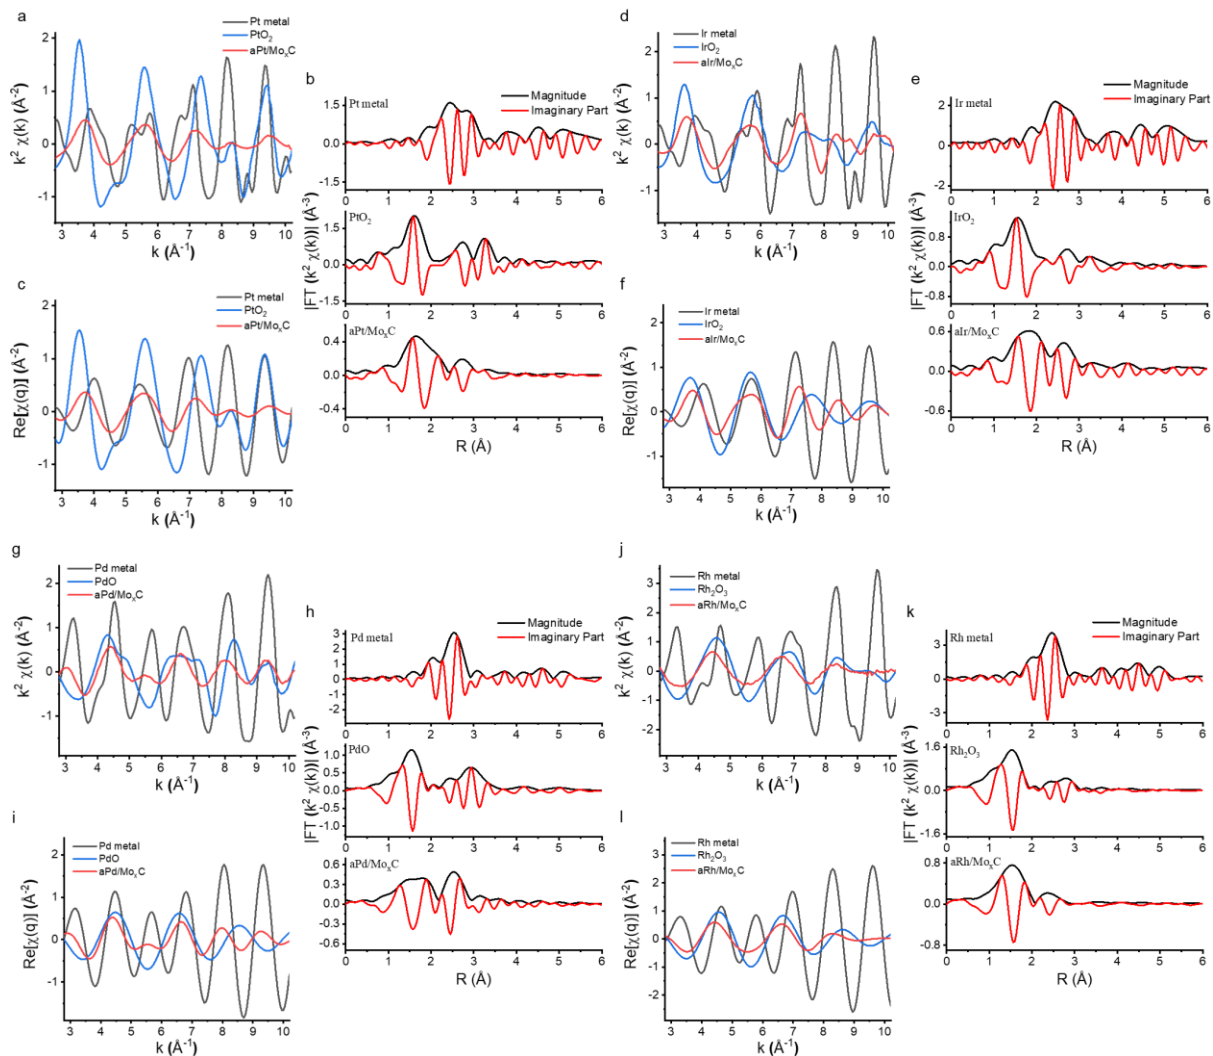

**Fig. S53** EXAFS analysis results for NM, NM oxide, and aNM/Mo<sub>x</sub>C. (a, d, g, j)  $k^2\chi(k)$  oscillations, (b, f, h, k)  $k^2$ -weighted  $\chi(R)$ , and (c, e, i, l) real part of the back Fourier-transform magnitude in the  $q$  space ( $\text{Re}[\chi(q)]$ ) at the (a-c) Pt L<sub>3</sub>-edge, (d-f) Ir L<sub>3</sub>-edge, (g-i) Pd K-edge, and (j-l) Rh K-edge.

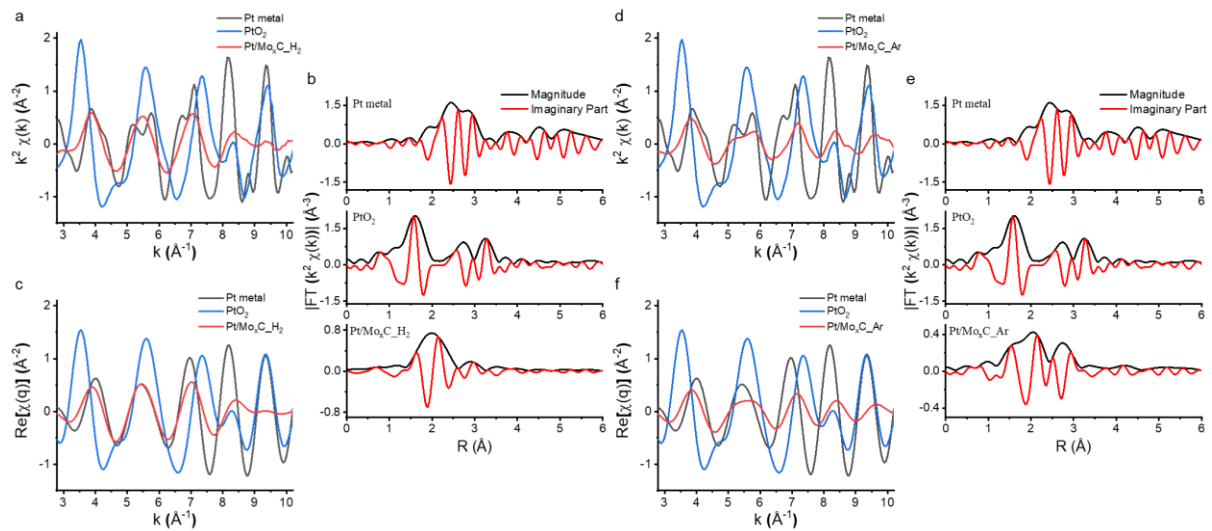

**Fig. S54** EXAFS analysis of Pt metal, PtO<sub>2</sub>, Pt/Mo<sub>0.5</sub>C-H<sub>2</sub>, and Pt/Mo<sub>0.5</sub>C-Ar. (a, d)  $k^2\chi(k)$  oscillations, (b, e)  $k^2$ -weighted  $\chi(R)$ , and (c, f) real part of back Fourier transform magnitude in  $q$  space ( $\text{Re}[\chi(q)]$ ) at Pt L<sub>3</sub>-edge for (a-c) Pt/Mo<sub>0.5</sub>C-H<sub>2</sub>, and (d-f) Pt/Mo<sub>0.5</sub>C-Ar.

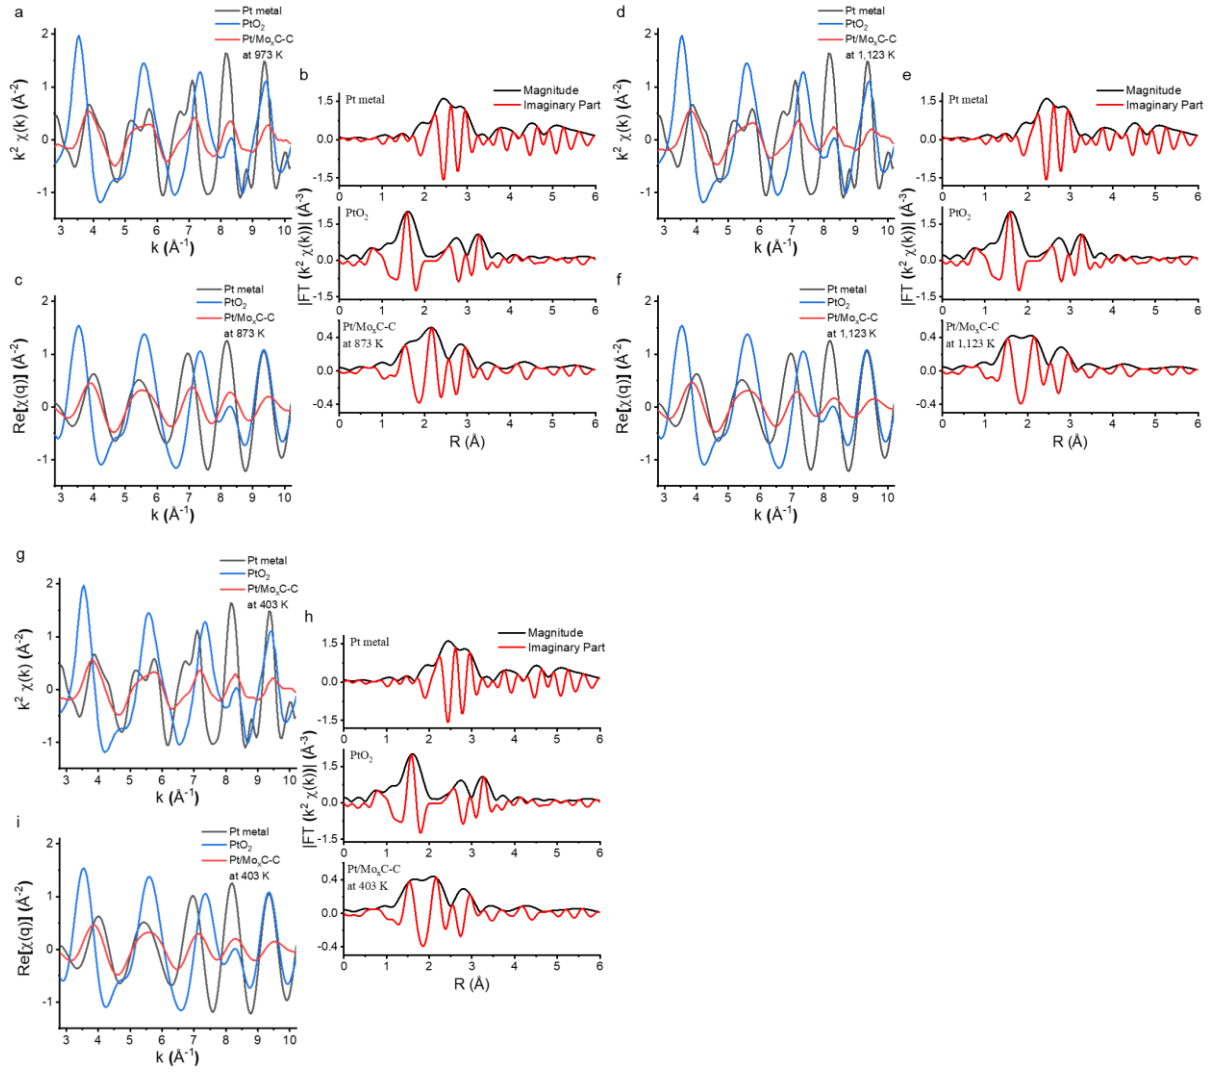

**Fig. S55** EXAFS analysis of Pt metal,  $\text{PtO}_2$ , and  $\text{Pt/Mo}_x\text{C-C}$  at 873 K, 1,123 K, 403 K. (a, d, g)  $k^2\chi(k)$  oscillations, (b, e, h)  $k^2$ -weighted  $\chi(R)$ , and (c, f, i) real part of back Fourier transform magnitude in  $q$  space ( $\text{Re}[\chi(q)]$ ) at Pt  $L_3$ -edge for (a-c)  $\text{Pt/Mo}_x\text{C-C}$  at 873 K, (d-f)  $\text{Pt/Mo}_x\text{C-C}$  at 1,123 K, and (g-i)  $\text{Pt/Mo}_x\text{C-C}$  at 403 K.

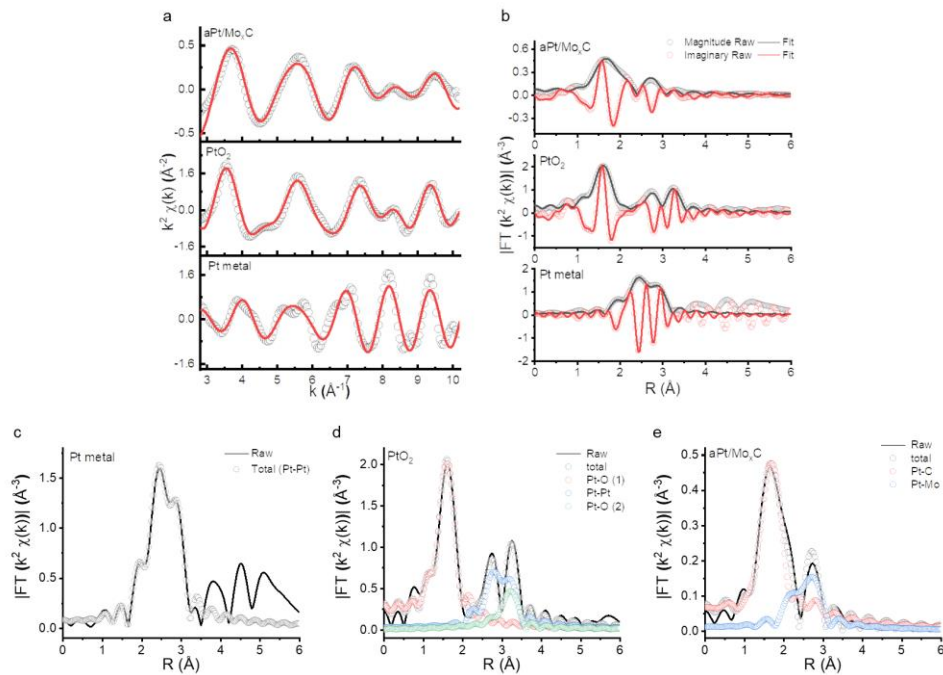

**Fig. S56** EXAFS experimental and fitted data. Pt L<sub>3</sub>-edge EXAFS experimental (dotted line) and fitted data (solid line) for aPt/Mo<sub>x</sub>C, PtO<sub>2</sub>, and Pt foil in (a)  $k$  space, and (b)  $R$  space. Also, raw (solid line) and deconvoluted path for fitted data (dotted line) for (c) Pt foil, (d) PtO<sub>2</sub>, and (e) aPt/Mo<sub>x</sub>C.

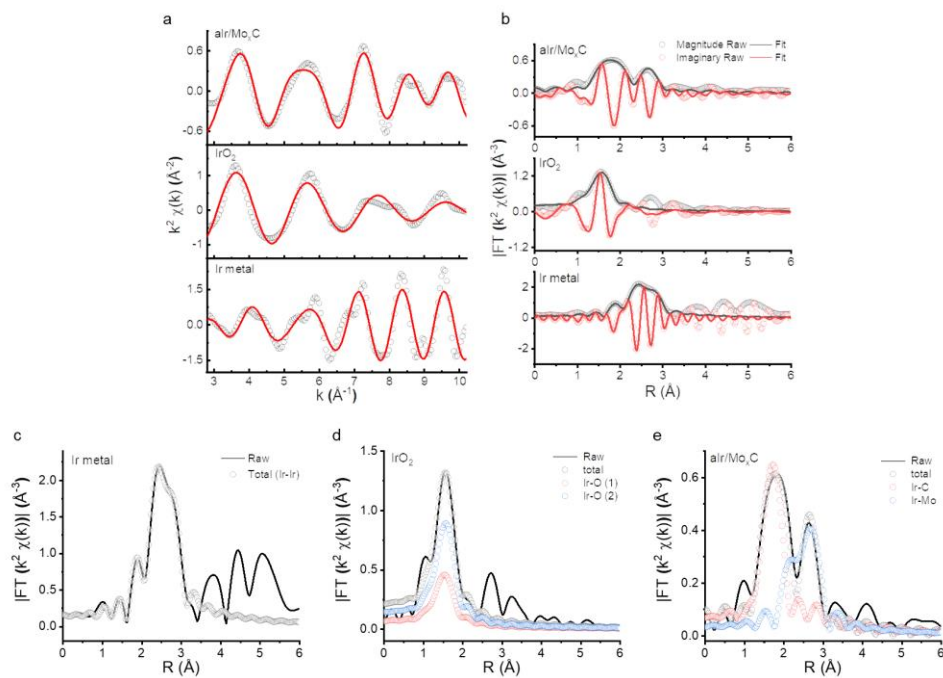

**Fig. S57** EXAFS experimental and fitted data. Ir  $L_3$ -edge EXAFS experimental (dotted line) and fitted data (solid line) for  $\text{alr/Mo}_x\text{C}$ ,  $\text{IrO}_2$ , and  $\text{Ir}$  foil in (a)  $k$  space, and (b)  $R$  space. Also, raw (solid line) and deconvoluted path for fitted data (dotted line) for (c)  $\text{Ir}$  foil, (d)  $\text{IrO}_2$ , and (e)  $\text{alr/Mo}_x\text{C}$ .

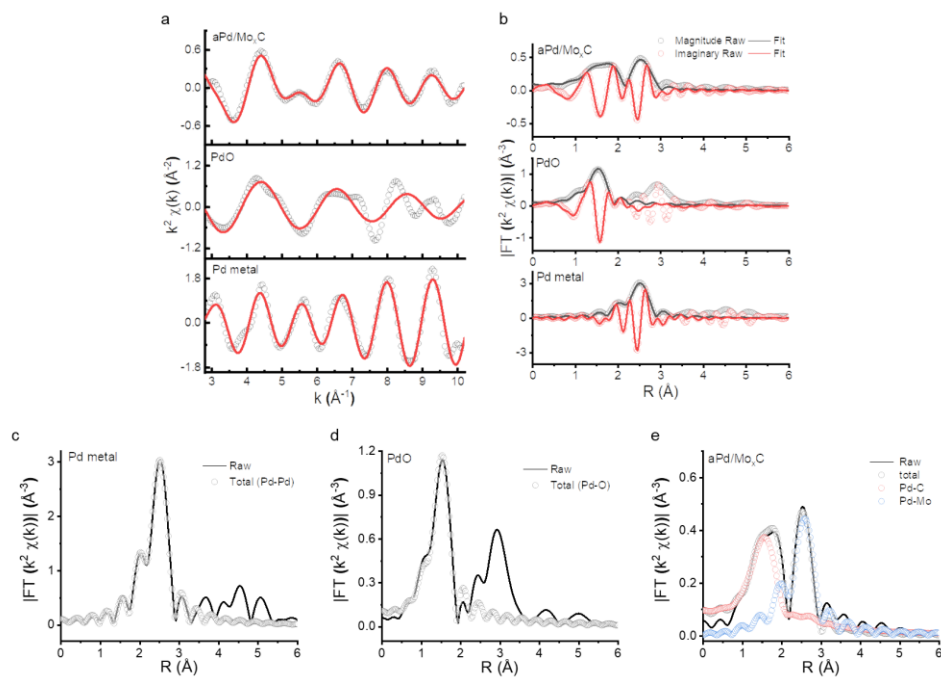

**Fig. S58** EXAFS experimental and fitted data. Pd K-edge EXAFS experimental (dotted line) and fitted data (solid line) for aPd/Mo<sub>x</sub>C, PdO, and Pd foil in (a)  $k$  space, and (b)  $R$  space. Also, raw (solid line) and deconvoluted path for fitted data (dotted line) for (c) Pd foil, (d) PdO, and (e) aPd/Mo<sub>x</sub>C.

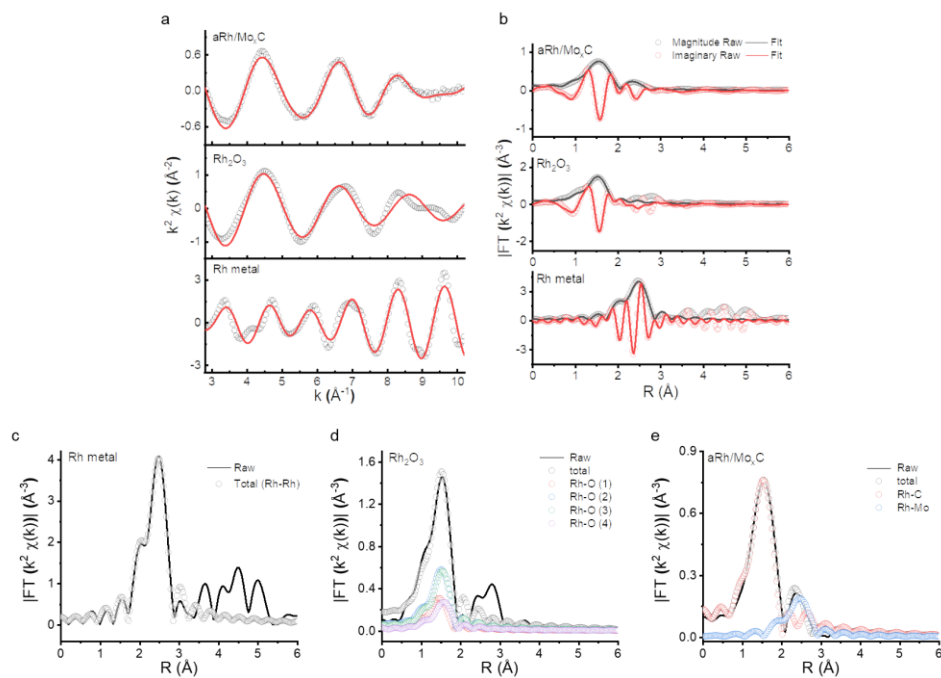

**Fig. S59** EXAFS experimental and fitted data. Rh K-edge EXAFS experimental (dotted line) and fitted data (solid line) for aRh/Mo<sub>x</sub>C, Rh<sub>2</sub>O<sub>3</sub>, and Rh foil in (a)  $k$  space, and (b)  $R$  space. Also, raw (solid line) and deconvoluted path for fitted data (dotted line) for (c) Rh foil, (d) Rh<sub>2</sub>O<sub>3</sub>, and (e) aRh/Mo<sub>x</sub>C.

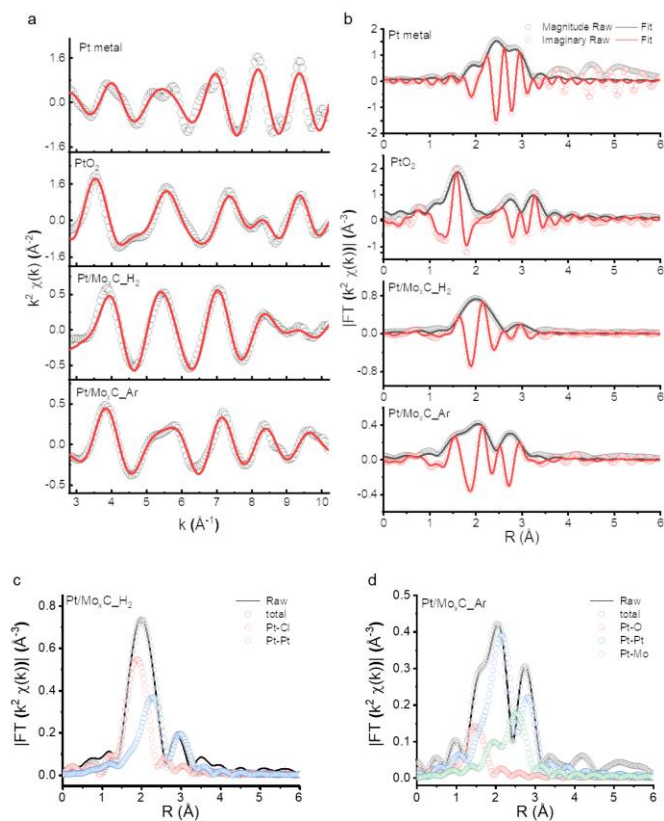

**Fig. S60** EXAFS experimental and fitted data. Pt L<sub>3</sub>-edge EXAFS experimental (dotted line) and fitted data (solid line) for Pt/Mo<sub>x</sub>C<sub>H2</sub>, Pt/Mo<sub>x</sub>C<sub>Ar</sub>, PtO<sub>2</sub>, and Pt foil in (a)  $k$  space, and (b)  $R$  space. Also, raw (solid line) and deconvoluted path for fitted data (dotted line) for (c) Pt/Mo<sub>x</sub>C<sub>H2</sub>, and (d) Pt/Mo<sub>x</sub>C<sub>Ar</sub>

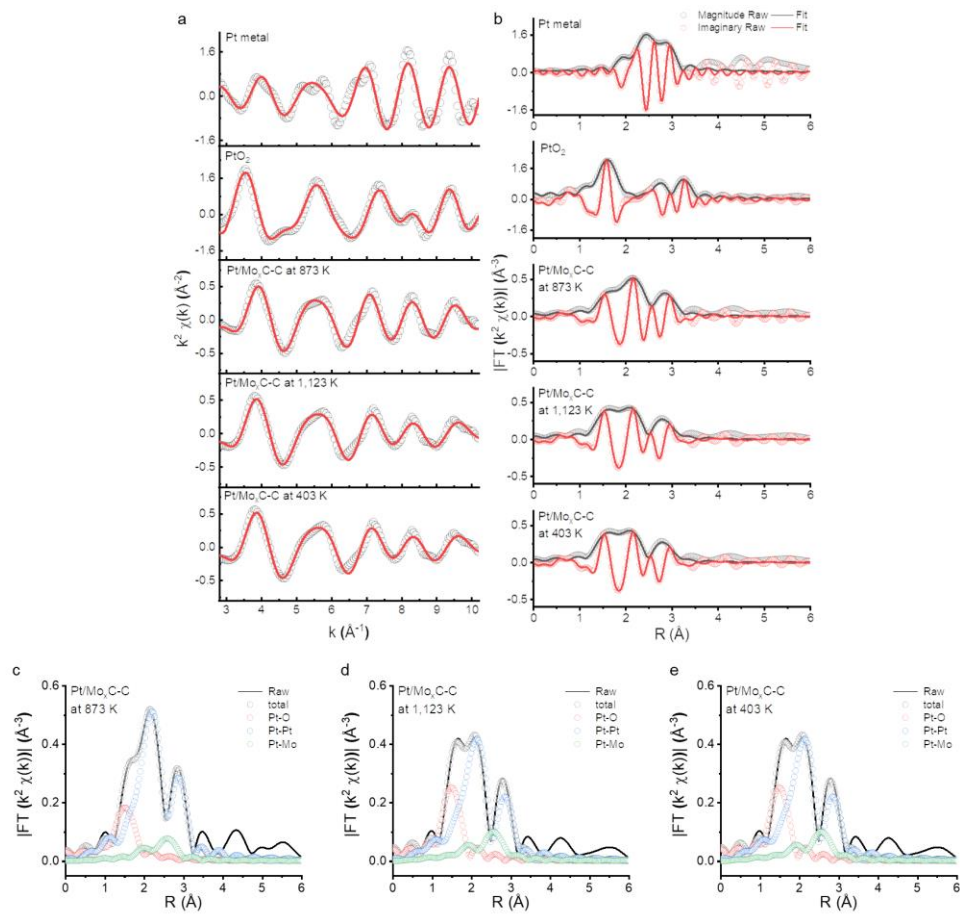

**Fig. S61** EXAFS experimental and fitted data. Pt L<sub>3</sub>-edge EXAFS experimental (dotted line) and fitted data (solid line) for Pt/Mo<sub>x</sub>C-C at 873 K, Pt/Mo<sub>x</sub>C-C at 1,123 K, Pt/Mo<sub>x</sub>C-C at 403 K, PtO<sub>2</sub>, and Pt foil in (a)  $k$  space, and (b)  $R$  space. Also, raw (solid line) and deconvoluted path for fitted data (dotted line) for (c) Pt/Mo<sub>x</sub>C-C at 873 K, (d) Pt/Mo<sub>x</sub>C-C at 1,123 K, and (e) Pt/Mo<sub>x</sub>C-C at 403 K.

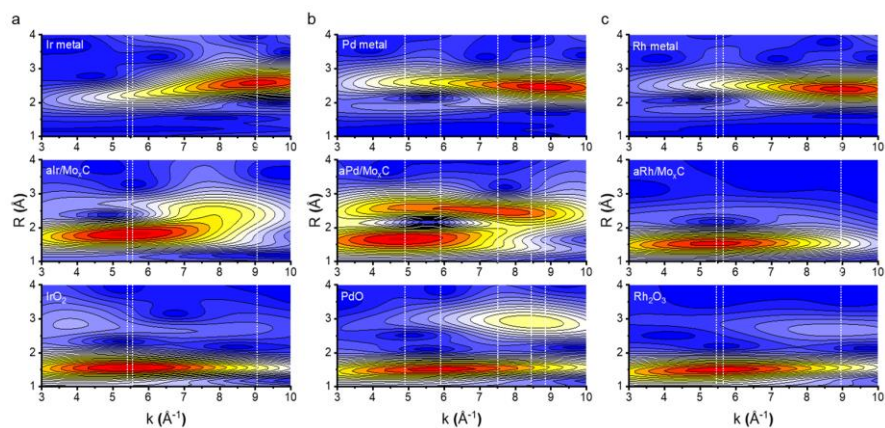

**Fig. S62** Wavelet transformations of NM metal, aNM/Mo<sub>x</sub>C, and NM oxide. Wavelet transforms for the  $k^2$ -weighted EXAFS oscillations of (a) Ir L<sub>3</sub>-edge (Ir foil, aIr/Mo<sub>x</sub>C, IrO<sub>2</sub>), (b) Pd K-edge (Pd foil, aPd/Mo<sub>x</sub>C, PdO), and (c) Rh K-edge (Rh foil, aRh/Mo<sub>x</sub>C, Rh<sub>2</sub>O<sub>3</sub>).

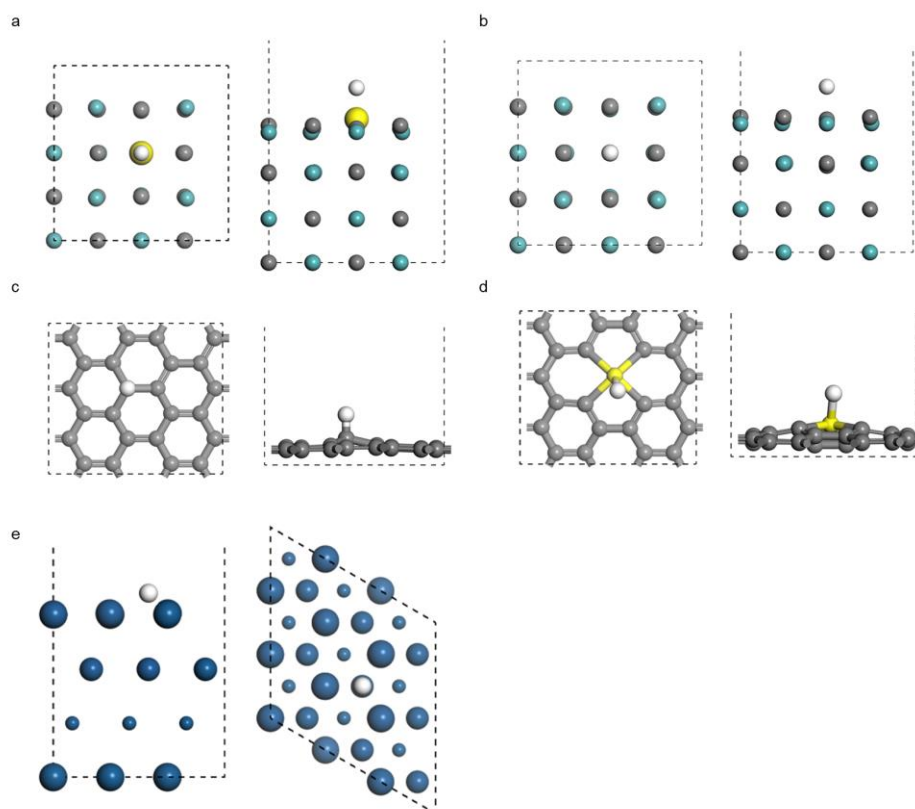

**Fig. S63** DFT models for \*H binding. DFT models for calculating the hydrogen binding energy on (a) Pt on  $\alpha$ -MoC (100), (b)  $\alpha$ -MoC (100), (c) graphene, (d) Pt on graphene, and (e) Pt (111).

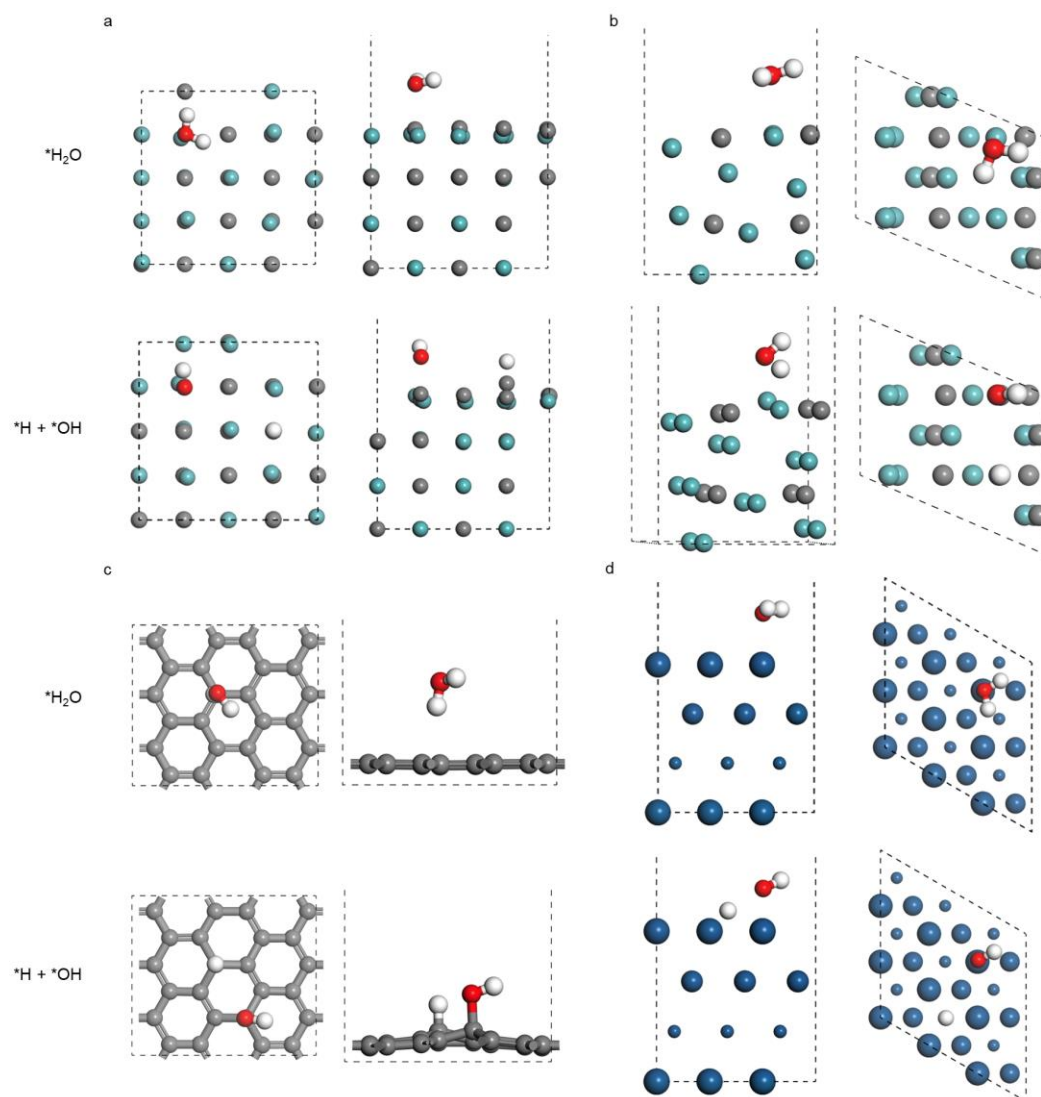

**Fig. S64** DFT models  $\text{H}_2\text{O}$  and  $\text{H} + \text{OH}$  binding. DFT models for calculating  $E_b$  of  $\text{H}_2\text{O}$ ,  $\text{H} + \text{OH}$ , and water dissociation barrier on (a)  $\alpha\text{-MoC}$  (100), (b)  $\beta\text{-Mo}_2\text{C}$ , (c) graphene, and (d) Pt (111).

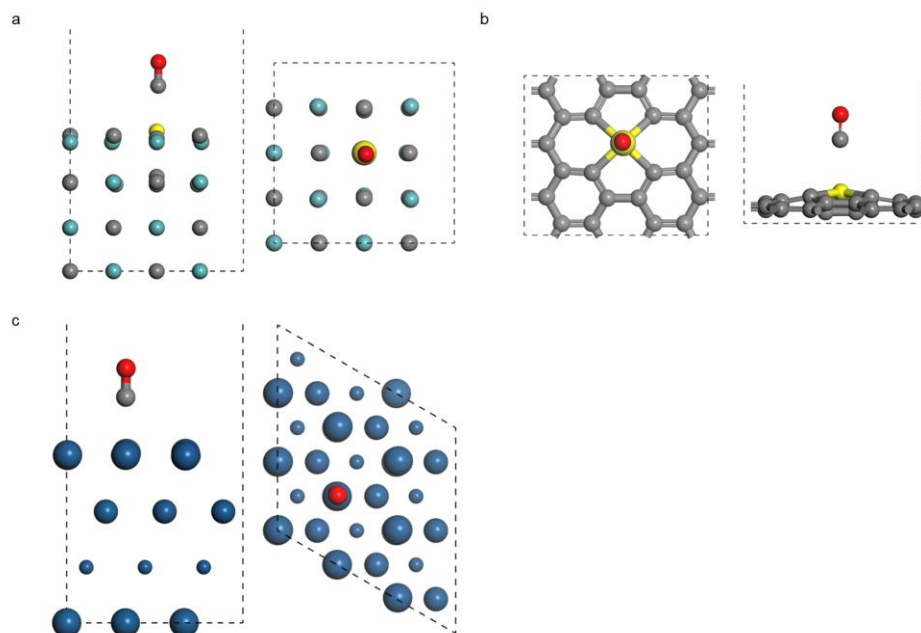

**Fig. S65** DFT models for  $^*\text{CO}$  binding. DFT models for calculating the CO binding energy on (a) Pt on  $\alpha$ -MoC (100), (b) Pt on graphene, and (c) Pt (111).

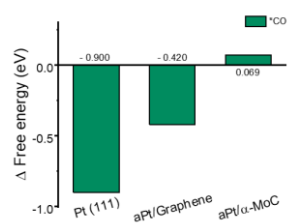

**Fig. S66** CO binding energies. CO binding free energies to Pt (111), atomically dispersed Pt on graphene (aPt/Graphene), and atomically dispersed Pt on  $\alpha$ -MoC (aPt/ $\alpha$ -MoC).

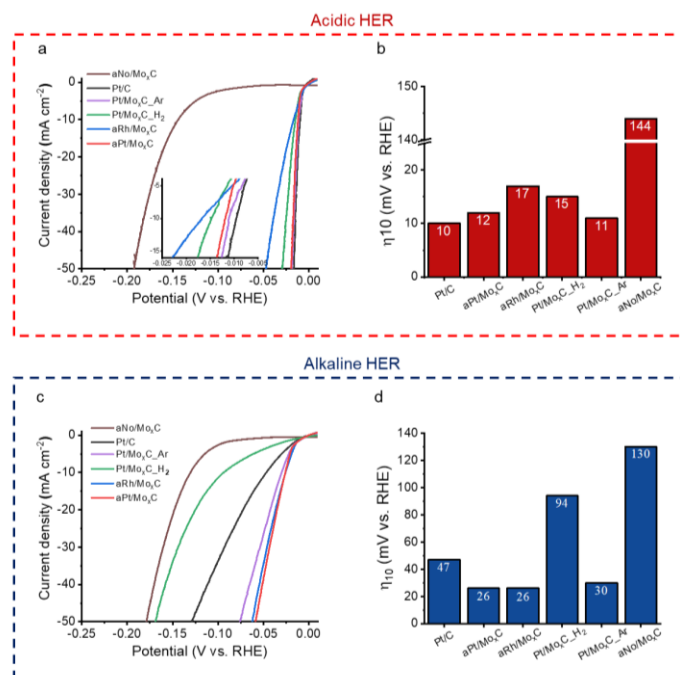

**Fig. S67** HER activity of catalysts. (a) Linear sweep voltammetry (LSV) and (b) overpotential for -10 mA·cm<sup>-2</sup> ( $\eta_{10}$ , mV vs. RHE) for HER in H<sub>2</sub>-saturated 0.5 M H<sub>2</sub>SO<sub>4</sub> solution. (c) LSV and (d)  $\eta_{10}$  for HER in H<sub>2</sub>-saturated 1 M KOH solution.

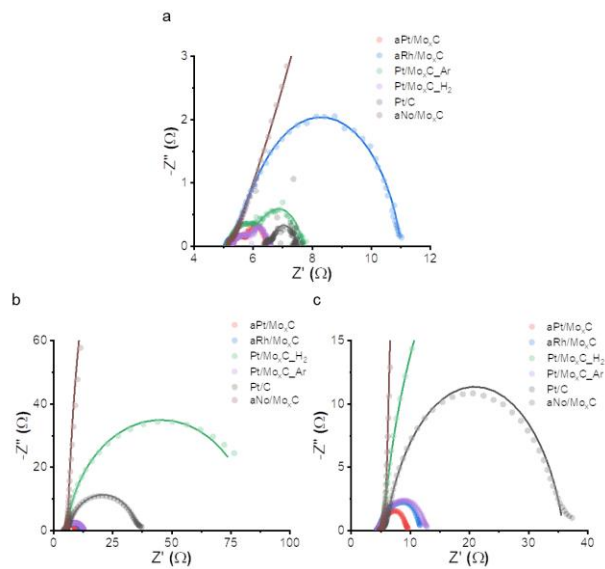

**Fig. S68** Electrochemical impedance spectroscopy for HER. Electrochemical impedance spectroscopy (EIS) Nyquist plot at -40 mV in (a)  $\text{H}_2$ -saturated 0.5 M  $\text{H}_2\text{SO}_4$  solution, and (b) 1 M KOH solution with (c) corresponding enlarged graph.

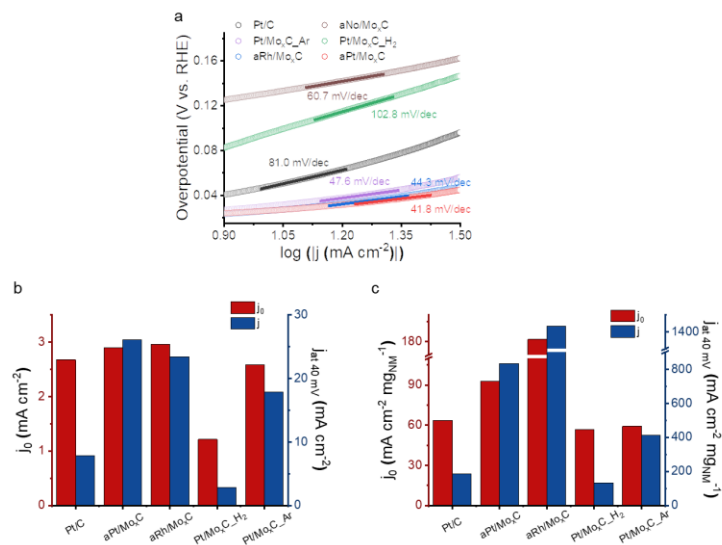

**Fig. S69** Alkaline HER activity of catalysts. (a) Tafel plot, (b) exchange current density ( $j_0$ , red) and current density at -40 mV (vs. RHE) ( $j_{40}$ , blue) and (c)  $j_0$  (red) and  $j_{40}$  per milligram of NM (blue) for HER in H<sub>2</sub>-saturated 1 M KOH solution.

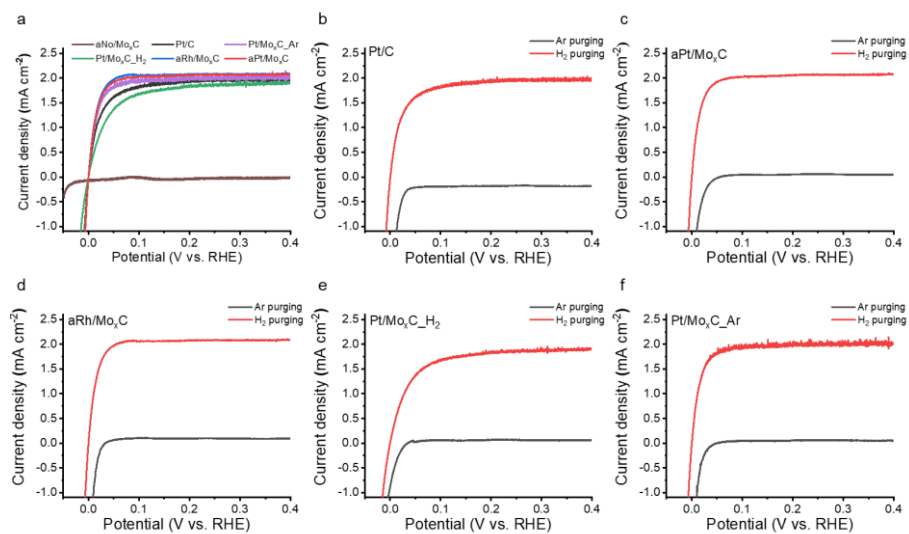

**Fig. S70** Alkaline HOR activity of catalysts. (a) LSV in 1 M KOH solution with H<sub>2</sub>-saturated condition for alkaline HOR, and (b-f) LSV curves in 1 M KOH solution with (red) H<sub>2</sub>-saturated and (black) Ar-saturated condition for (b) commercial Pt/C, (c) aPt/Mo<sub>x</sub>C, (d) aRh/Mo<sub>x</sub>C, (e) Pt/Mo<sub>x</sub>C\_H<sub>2</sub>, and (f) Pt/Mo<sub>x</sub>C\_Ar to distinguish the non-Faradaic current density of HOR.

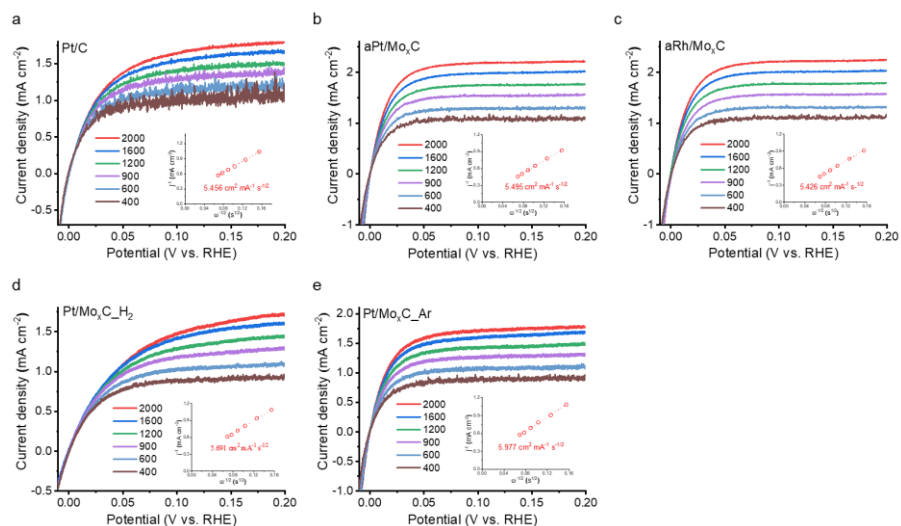

**Fig. S71** Koutecky-Levich plot for alkaline HOR. LSV curves at different rotation rates, and (inlet) corresponding Koutecky-Levich plot at 150 mV (vs. RHE) in  $\text{H}_2$ -saturated 1 M KOH solution for (a) commercial Pt/C, (b) aPt/Mo<sub>x</sub>C, (c) aRh/Mo<sub>x</sub>C, (d) Pt/Mo<sub>x</sub>C\_H<sub>2</sub>, and (e) Pt/Mo<sub>x</sub>C\_Ar.

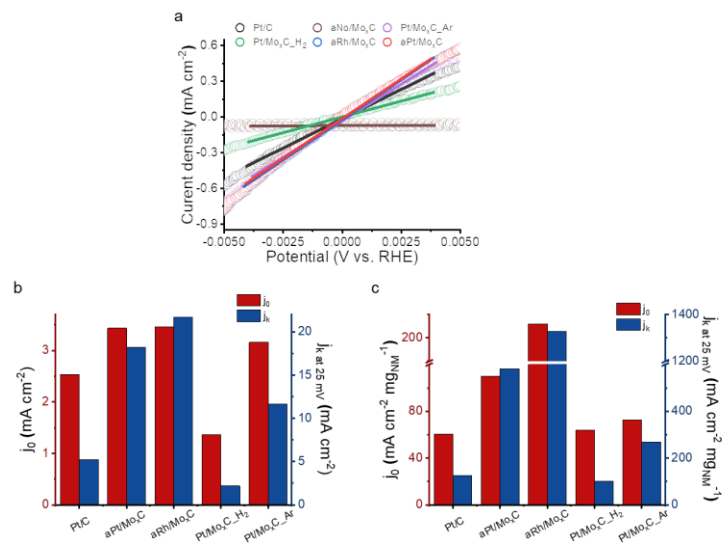

**Fig. S72** Alkaline HOR activity of catalysts. (a) LSV curves of micropolarization region (-5 to +5 mV vs. RHE) in H<sub>2</sub>-saturated 1 M KOH solution. (b)  $j_0$  (red) and kinetic current density at 25 mV (vs. RHE) ( $j_k$  at 25 mV, blue), and (c)  $j_0$  (red) and  $j_k$  at 25 mV per milligram of NM (blue).

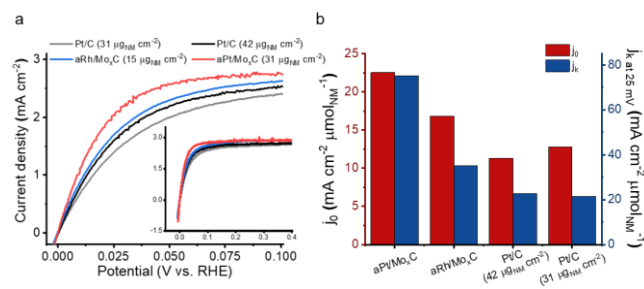

**Fig. S73** Alkaline HOR activity of the catalysts. (a) LSV curves, (b) exchange current density ( $j_0$ , red), and kinetic current density at 25 mV ( $j_k$  at 25 mV, blue) in a 0.1 M KOH solution saturated with H<sub>2</sub> for the alkaline HOR.

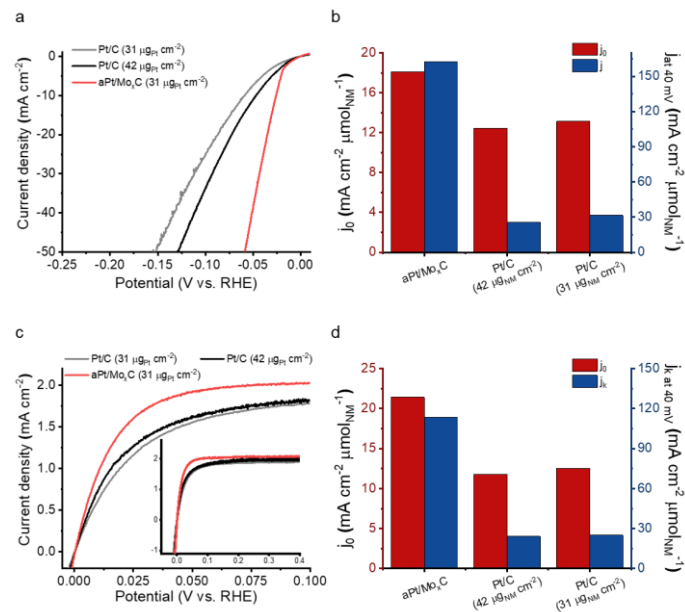

**Fig. S74** Alkaline HER and HOR activities of the catalysts with similar Pt loadings. (a, c) LSV curves, (b) exchange current density ( $j_0$ , red) and current density at 25 mV ( $j_{at\ 25mV}$ , blue), and (d)  $j_0$  (red) and kinetic current density at 25 mV ( $j_k$  at 25 mV, blue) in a 1 M KOH solution saturated with H<sub>2</sub> for the alkaline HER and HOR.

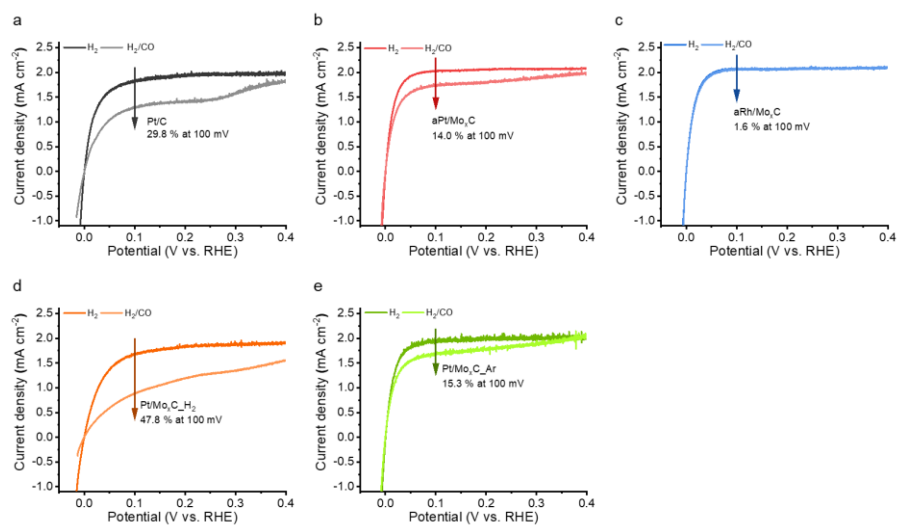

**Fig. S75** The effect of CO poisoning in alkaline HOR activity. LSV curves for HOR in 1 M KOH solution with  $\text{H}_2$ -saturated (deep color) and 1,000 ppm  $\text{CO}/\text{H}_2$ -saturated condition (light color) for (a) aPt/Mo<sub>x</sub>C, (b) aRh/Mo<sub>x</sub>C, (c) Pt/Mo<sub>x</sub>C<sub>H<sub>2</sub></sub>, (d) Pt/Mo<sub>x</sub>C<sub>Ar</sub>, and (e) commercial Pt/C with percent current density decrease with the presence of 1,000 ppm CO.

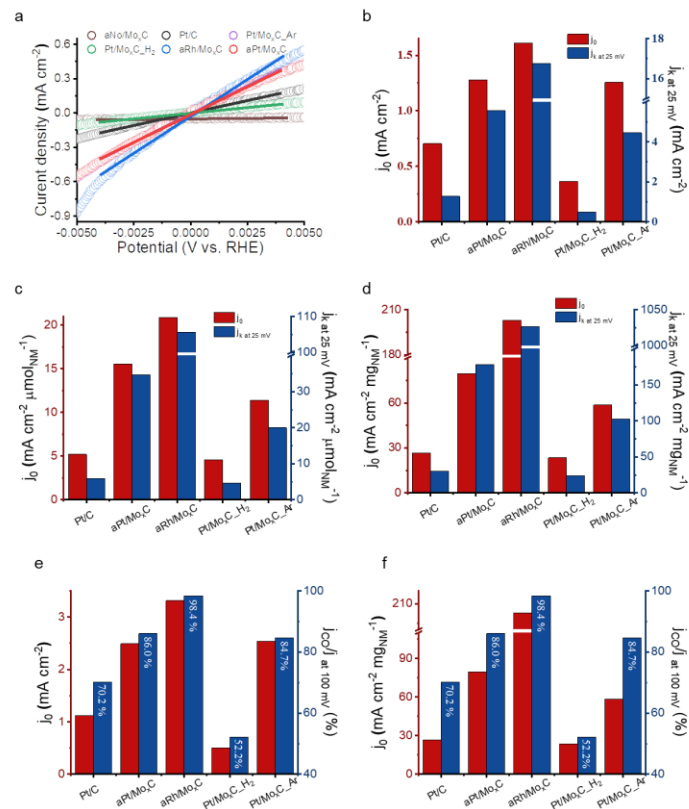

**Fig. S76** Alkaline HOR activity with the presence of CO poisoning. (a) LSV curves of micropolarization region (-5 to +5 mV vs. RHE) in 1,000 ppm CO/H<sub>2</sub>-saturated 1 M KOH solution. (b)  $j_0$  (red) and  $j_k$  at 25 mV (blue), (c) those per micromole of NM, and (d) those per milligram of NM. (e)  $j_0$  (red) with presence of CO, and current density with CO as a percentage (blue) of that without CO at 100 mV (vs. RHE) ( $j_{CO}/j_{at 100 mV}$ ), and (f) those per milligram of NM.

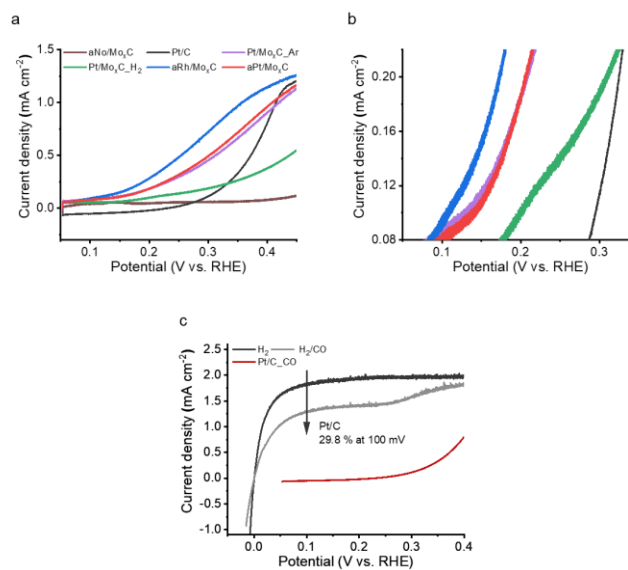

**Fig. S77** Electrochemical CO oxidation activity of catalysts. (a) LSV curves for CO oxidation in CO-saturated 1 M KOH solution, and (b) corresponding enlarged graph to verify the onset potential. (c) LSV curves of commercial Pt/C in 1 M KOH solution with H<sub>2</sub>-saturated (black), 1,000 ppm CO/H<sub>2</sub>-saturated, and CO-saturated condition to identify the effect of CO removal by electrochemical CO oxidation.

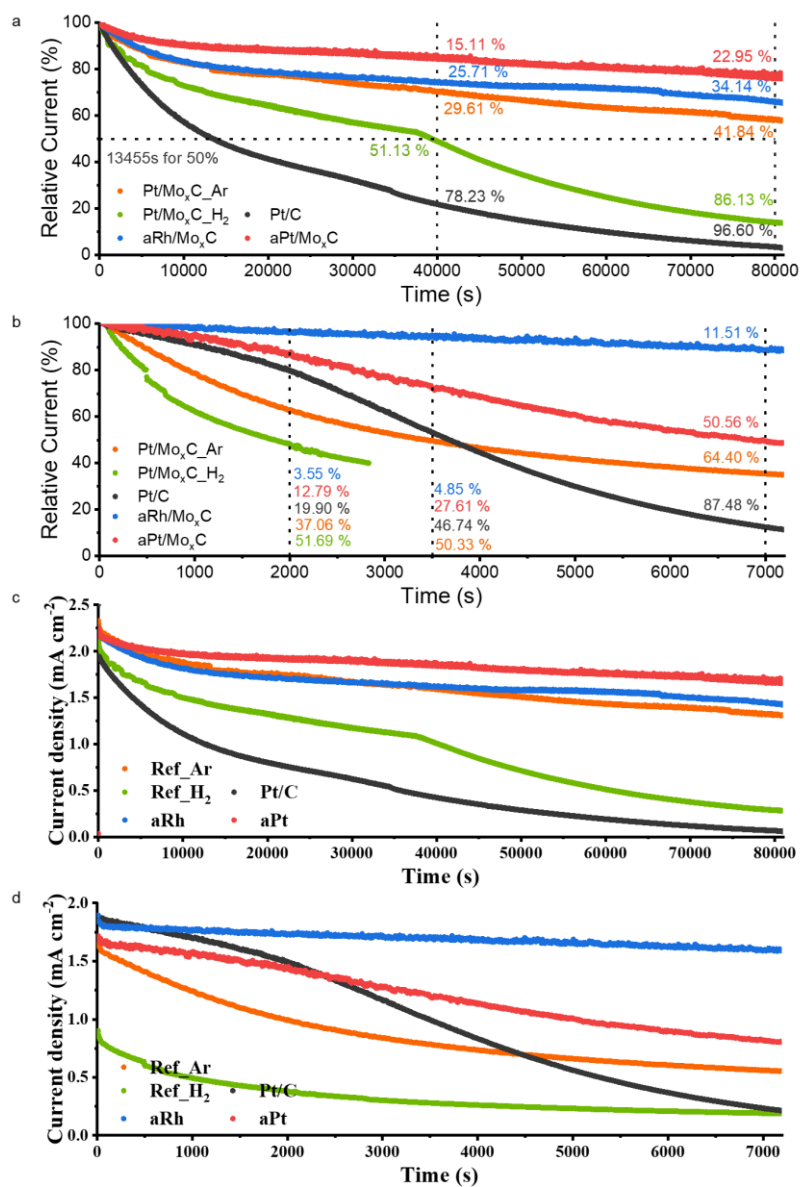

**Fig. S78** Electrochemical HOR stability and CO tolerance of the catalysts. Relative current density (%) during chronoamperometry at 100 mV (vs. RHE) in H<sub>2</sub>-saturated 1 M KOH solution (a) without and (b) with 1,000 ppm CO. Corresponding current density in the H<sub>2</sub>-saturated 1 M KOH solution (c) without and (d) with 1,000 ppm CO.

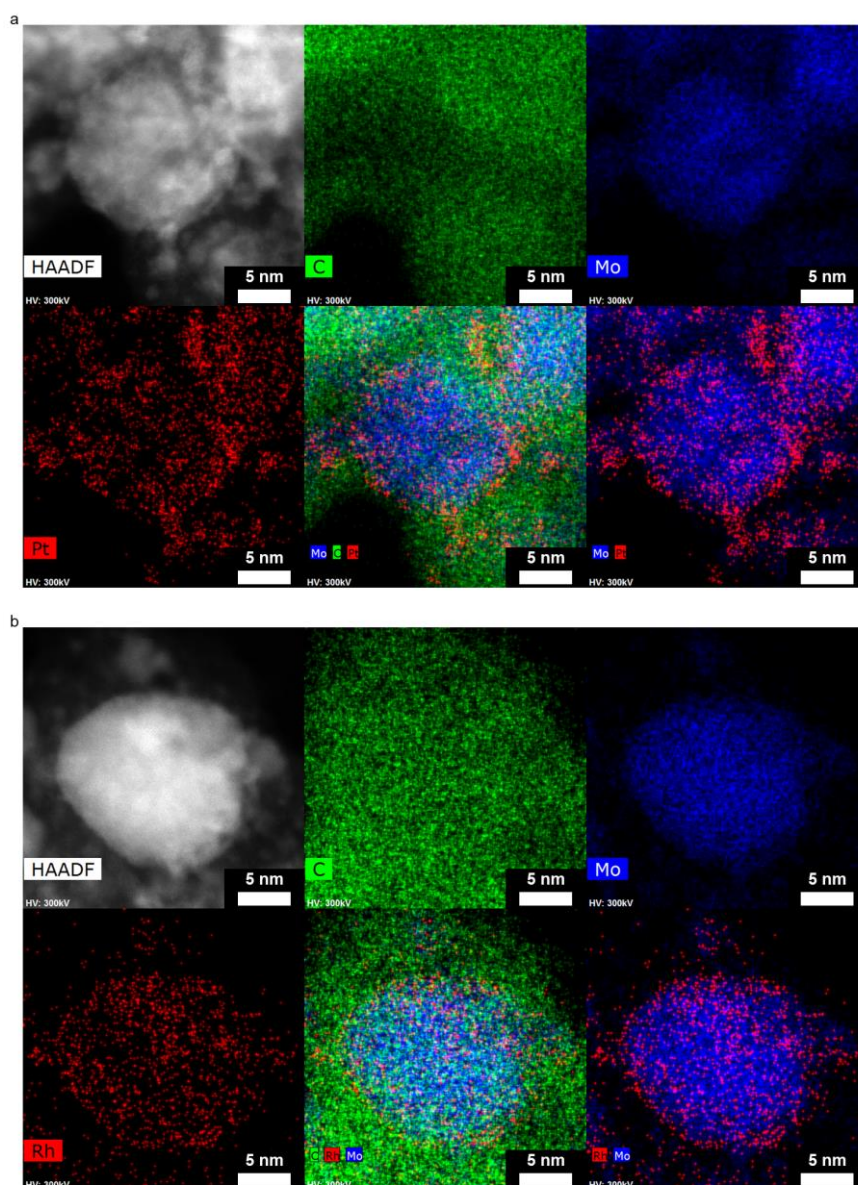

**Fig. S79** STEM results for aNM/Mo<sub>x</sub>C after the stability tests in RDE experiments. HAADF-STEM images and corresponding EDS mappings for (a) aPt/Mo<sub>x</sub>C and (b) aRh/Mo<sub>x</sub>C displaying C, Mo, Pt, or Rh and their overlap (red: Pt or Rh, blue: Mo, and green: C).

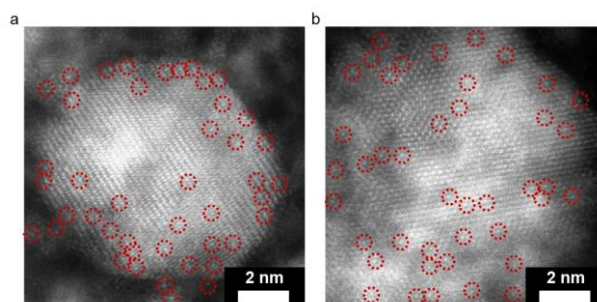

**Fig. S80** Z-contrast images of aNM/Mo<sub>x</sub>C post-stability tests in RDE experiments. HAADF-STEM images of (a) aPt/Mo<sub>x</sub>C and (b) aRh/Mo<sub>x</sub>C (red circle: NM ADCs).

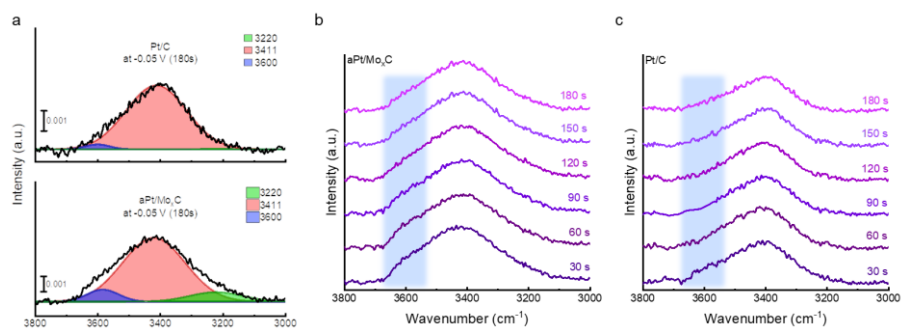

**Fig. S81** *In situ* ATR-SEIRAS results, coupled with chronoamperometry. *In situ* ATR-SEIRAS results, coupled with chronoamperometry (a) at -0.05 V (vs. RHE) after 180 s, or at 30 to 180 s for (b) aPt/Mo<sub>x</sub>C, and (c) Pt/C.

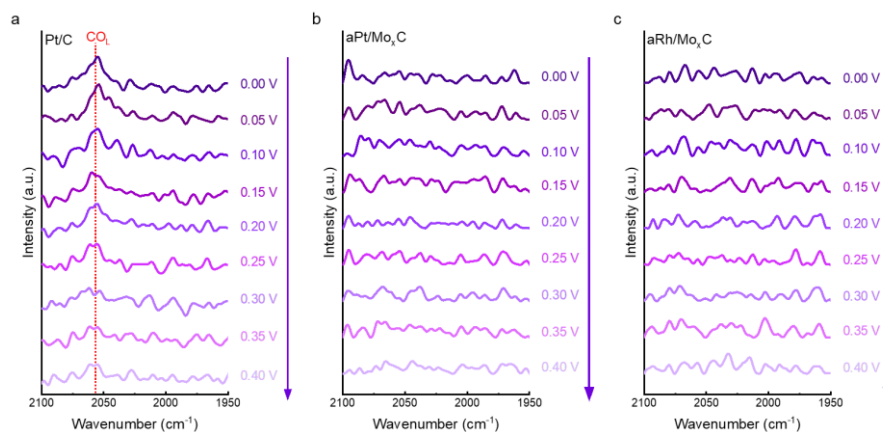

**Fig. S82** *In situ* ATR-SEIRAS results, coupled with LSV. *In situ* ATR-SEIRAS results, coupled with LSV at potential of 0.00 to 0.40 V (vs. RHE) in CO-saturated condition for (a) Pt/C, (b) aPt/Mo<sub>x</sub>C, (c) aRh/Mo<sub>x</sub>C.

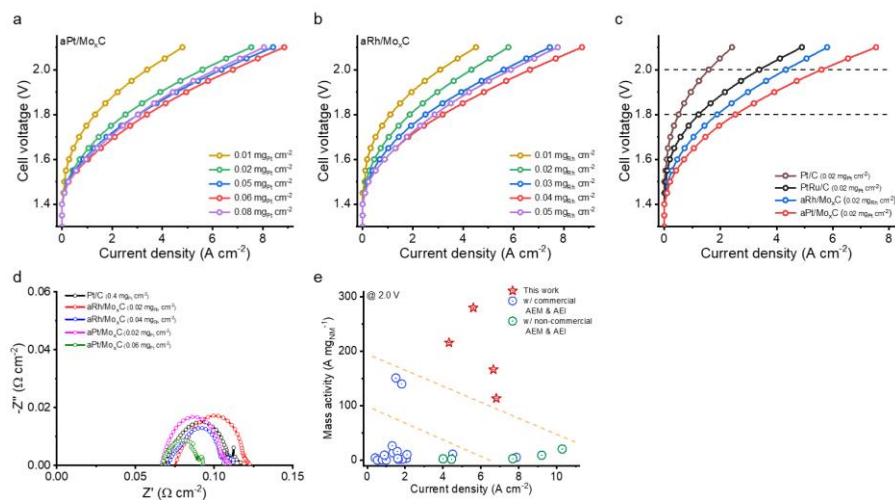

**Fig. S83** AEMWE performances. Polarization curves with different NM loading at cathode for (a) aPt/Mo<sub>x</sub>C, and (b) aRh/Mo<sub>x</sub>C. (c) Polarization curves of commercial and synthesized catalysts with same Pt loading (0.020 mg<sub>Pt</sub> cm<sup>-2</sup>). (d) EIS Nyquist plot of AEMWEs at 1.8 V<sub>cell</sub>. (e) Comparison of current density and mass activity for NM of AEMWEs at 2.0 V<sub>cell</sub>.

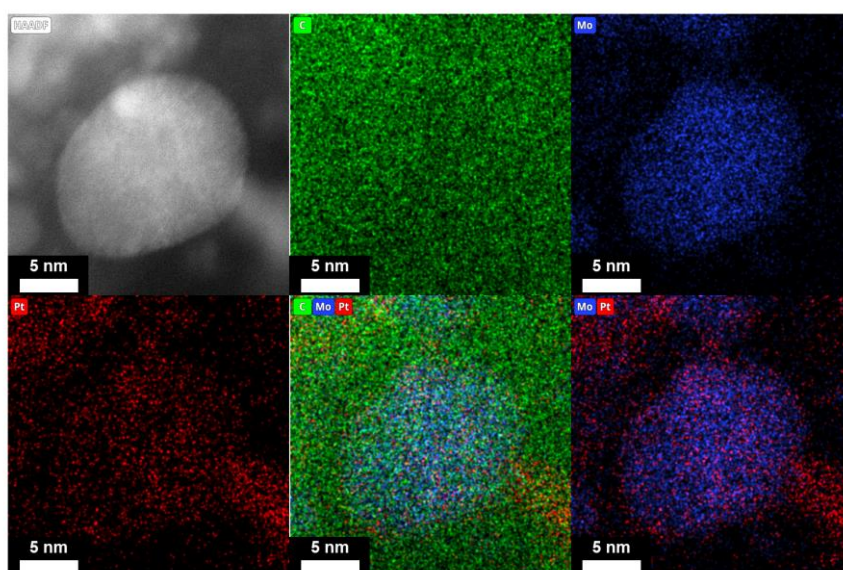

**Fig. S84** STEM results for aPt/Mo<sub>x</sub>C after performing stability tests in single-cell experiments. HAADF-STEM images and corresponding EDS mappings for aPt/Mo<sub>x</sub>C displaying C, Mo, Pt, and their overlap (red: Pt, blue: Mo, and green: C).

## Supplementary Tables

**Table S1** Metal contents before and after high-*T* carburization. Inductively-coupled plasma mass spectroscopy (ICP-MS results of the Pt and Mo metal weight compositions and ratios for (a) Pt/Mo<sub>x</sub>C-C at 403 K and (b) aPt/Mo<sub>x</sub>C.

| Catalysts                      | Pt/Mo <sub>x</sub> C-C<br>at 403 K | aPt/Mo <sub>x</sub> C |
|--------------------------------|------------------------------------|-----------------------|
| Pt (wt%)                       | 3.942                              | 5.071                 |
| Mo (wt%)                       | 44.05                              | 54.56                 |
| Molar ratio of<br>Pt to Mo (%) | 5.502                              | 5.715                 |

**Table S2** Relative binding energy of various NM according to type of supports. Relative binding energy  $E_b$  of various NMs (Pd, Rh, Pt, Ir, Au, and Ag) with respect to their cohesive energies on  $\text{Mo}_x\text{C}$  ( $\alpha$ -MoC, defective  $\alpha$ -MoC,  $\beta$ -Mo<sub>2</sub>C, and defective  $\beta$ -Mo<sub>2</sub>C) and graphite surfaces.

| Support                              | Metal species |       |       |       |       |       |
|--------------------------------------|---------------|-------|-------|-------|-------|-------|
|                                      | Pd            | Rh    | Pt    | Ir    | Au    | Ag    |
| $\alpha$ -MoC                        | 0.974         | 0.915 | 0.918 | 0.822 | 0.718 | 0.650 |
| defective $\alpha$ -MoC              | 1.070         | 1.061 | 0.998 | 0.969 | 0.971 | 0.837 |
| $\beta$ -Mo <sub>2</sub> C           | 1.204         | 1.164 | 1.062 | 1.061 | 0.927 | 1.006 |
| defective $\beta$ -Mo <sub>2</sub> C | 1.497         | 1.369 | 1.332 | 1.241 | 1.183 | 1.151 |
| Graphite                             | 0.341         | 0.321 | 0.391 | 0.293 | 0.163 | 0.144 |

**Table S3** Diffusion barrier of NM ADCs into lattices of Mo<sub>x</sub>C support. Diffusion barrier (eV) of NM (Pt, Ir, Rh, and Pd) from topmost surface to bottom layers of Mo<sub>x</sub>C ( $\alpha$ :  $\alpha$ -MoC,  $\beta$ :  $\beta$ -Mo<sub>2</sub>C). (see Fig. S12 for DFT models employed).

|                 | Metal species |         |          |         |          |         |          |         |
|-----------------|---------------|---------|----------|---------|----------|---------|----------|---------|
|                 | Pt            |         | Rh       |         | Pd       |         | Ir       |         |
|                 | $\alpha$      | $\beta$ | $\alpha$ | $\beta$ | $\alpha$ | $\beta$ | $\alpha$ | $\beta$ |
| 1 <sup>st</sup> | 1.88          | 3.95    | 1.31     | 4.00    | 2.53     | 4.41    | 0.44     | 3.68    |
| 2 <sup>nd</sup> | 5.42          | 5.36    | 4.27     | 4.82    | 5.72     | 5.55    | 3.97     | 4.57    |

**Table S4** Metal contents for each sample. Metal weight composition using inductively-coupled plasma mass spectroscopy (ICP-MS) of aNM/Mo<sub>x</sub>C, Pt/Mo<sub>x</sub>C\_H<sub>2</sub>, and Pt/Mo<sub>x</sub>C\_Ar.

| NM<br>Contents | Catalysts             |                       |                       |                       |                                     |                         |
|----------------|-----------------------|-----------------------|-----------------------|-----------------------|-------------------------------------|-------------------------|
|                | aPt/Mo <sub>x</sub> C | aIr/Mo <sub>x</sub> C | aPd/Mo <sub>x</sub> C | aRh/Mo <sub>x</sub> C | Pt/Mo <sub>x</sub> C_H <sub>2</sub> | Pt/Mo <sub>x</sub> C_Ar |
| wt %           | 5.21                  | 4.27                  | 3.56                  | 2.72                  | 3.57                                | 7.23                    |

**Table S5** Variation of structural parameters of aNM/Mo<sub>x</sub>C by dynamic placement. Structural parameters extracted from the Pt L<sub>3</sub>-edge, Ir L<sub>3</sub>-edge, Pd K-edge, and Rh K-edge EXAFS fitting results. CN: coordination number, R: interatomic distance,  $\sigma^2$ : Debye-Waller factor (a measure of the static and thermal disorder in absorber-scatterer distances), R-factor is related to the goodness of fit (lower value means goodness). (weighting:  $k^2$ )

| Sample                         | Shell | CN              | R (Å)           | $\sigma^2 (10^{-3} \text{ Å}^2)$ | R-factor |
|--------------------------------|-------|-----------------|-----------------|----------------------------------|----------|
| Pt                             | Pt-Pt | 12*             | $2.76 \pm 0.00$ | 4.18                             | 0.002    |
| aPt/Mo <sub>x</sub> C          | Pt-C  | $3.09 \pm 0.30$ | $2.11 \pm 0.01$ | 5.82                             | 0.013    |
|                                | Pt-Mo | $0.66 \pm 0.18$ | $2.84 \pm 0.02$ | 2.50                             |          |
| PtO <sub>2</sub>               | Pt-O  | 6*              | $2.01 \pm 0.00$ | 2.68                             | 0.008    |
|                                | Pt-Pt | 6*              | $3.11 \pm 0.01$ | 3.25                             |          |
|                                | Pt-O  | 7*              | $3.67 \pm 0.02$ | 2.15                             |          |
| Ir                             | Ir-Ir | 12*             | $2.70 \pm 0.00$ | 2.34                             | 0.004    |
| aIr/Mo <sub>x</sub> C          | Ir-C  | $3.27 \pm 0.38$ | $2.13 \pm 0.01$ | 2.29                             | 0.013    |
|                                | Ir-Mo | $1.82 \pm 0.29$ | $2.81 \pm 0.01$ | 3.12                             |          |
| IrO <sub>2</sub>               | Ir-O  | 2*              | $1.98 \pm 0.00$ | 5.78                             | 0.005    |
|                                | Ir-O  | 4*              | $2.02 \pm 0.00$ |                                  |          |
| Pd                             | Pd-Pd | 12*             | $2.73 \pm 0.00$ | 4.94                             | 0.008    |
| aPd/Mo <sub>x</sub> C          | Pd-C  | $4.56 \pm 0.46$ | $2.15 \pm 0.01$ | 13.9                             | 0.008    |
|                                | Pd-Mo | $3.84 \pm 0.38$ | $2.79 \pm 0.01$ | 10.1                             |          |
| PdO                            | Pd-O  | 4*              | $2.02 \pm 0.01$ | 1.03                             | 0.005    |
| Rh                             | Rh-Rh | 12*             | $2.68 \pm 0.00$ | 2.56                             | 0.004    |
| aRh/Mo <sub>x</sub> C          | Rh-C  | $5.08 \pm 0.46$ | $2.10 \pm 0.01$ | 4.22                             | 0.012    |
|                                | Rh-Mo | $1.00 \pm 0.36$ | $2.73 \pm 0.02$ | 6.40                             |          |
| Rh <sub>2</sub> O <sub>3</sub> | Rh-O  | 1*              | $1.95 \pm 0.01$ | 1.77                             | 0.008    |
|                                | Rh-O  | 2*              | $2.00 \pm 0.01$ |                                  |          |
|                                | Rh-O  | 2*              | $2.04 \pm 0.01$ |                                  |          |
|                                | Rh-O  | 1*              | $2.07 \pm 0.01$ |                                  |          |

Structural parameters extracted from the EXAFS fitting of reference metal foil. CN is the coordination number; R is the interatomic distance;  $\sigma^2$  is the Debye-Waller factor (a measure of the static and thermal disorder in absorber-scatterer distance);  $\Delta E_0$  is edge energy shift (the zero kinetic energy difference between experiment and theoretical model); R-factor value is related with the goodness of the fitting.

\* Value was assigned in curving fitting based on standard structure

R<sub>bkf</sub> was set to 1.0 in background removal to remove the noise oscillation below 1 Å in R-space

S<sub>0</sub><sup>2</sup> value was calculated from the fitting of metal foil with standard metal structure

**Table S6** Variation of structural parameters of comparison groups by dynamic placement. Structural parameters extracted from the Pt L<sub>3</sub>-edge EXAFS fitting results. CN: coordination number, R: interatomic distance,  $\sigma^2$ : Debye-Waller factor (a measure of the static and thermal disorder in absorber-scatterer distances), R-factor is related to the goodness of fit (lower value means goodness). (weighting:  $k^2$ )

| Sample                               | Shell | CN              | R (Å)           | $\sigma^2 (10^{-3} \text{ Å}^2)$ | R-factor |
|--------------------------------------|-------|-----------------|-----------------|----------------------------------|----------|
| Pt                                   | Pt-Pt | 12*             | $2.76 \pm 0.00$ | 4.18                             | 0.002    |
| aPt/Mo <sub>x</sub> C                | Pt-C  | $3.09 \pm 0.30$ | $2.11 \pm 0.01$ | 5.82                             | 0.013    |
|                                      | Pt-Mo | $0.66 \pm 0.18$ | $2.84 \pm 0.02$ | 2.50                             |          |
| PtO <sub>2</sub>                     | Pt-O  | 6*              | $2.01 \pm 0.00$ | 2.68                             | 0.008    |
|                                      | Pt-Pt | 6*              | $3.11 \pm 0.01$ | 3.25                             |          |
|                                      | Pt-O  | 7*              | $3.67 \pm 0.02$ | 2.15                             |          |
| Pt/Mo <sub>x</sub> C-H <sub>2</sub>  | Pt-Cl | $1.73 \pm 0.12$ | $2.31 \pm 0.01$ | 6.07                             | 0.004    |
|                                      | Pt-Pt | $6.14 \pm 0.61$ | $2.75 \pm 0.01$ | 12.17                            |          |
| Pt/Mo <sub>x</sub> C-Ar              | Pt-O  | $0.38 \pm 0.05$ | $1.94 \pm 0.01$ | 0.78                             | 0.002    |
|                                      | Pt-Pt | $6.35 \pm 0.27$ | $2.68 \pm 0.00$ | 11.60                            |          |
|                                      | Pt-Mo | $1.82 \pm 0.18$ | $2.70 \pm 0.00$ |                                  |          |
| Pt/Mo <sub>x</sub> C-C<br>at 873 K   | Pt-O  | $0.61 \pm 0.04$ | $1.96 \pm 0.01$ | 3.10                             | 0.001    |
|                                      | Pt-Pt | $8.05 \pm 0.17$ | $2.71 \pm 0.02$ | 11.2                             |          |
|                                      | Pt-Mo | $0.77 \pm 0.11$ | $2.73 \pm 0.02$ |                                  |          |
| Pt/Mo <sub>x</sub> C-C<br>at 1,123 K | Pt-O  | $0.69 \pm 0.06$ | $1.94 \pm 0.01$ | 0.82                             | 0.002    |
|                                      | Pt-Pt | $8.49 \pm 0.35$ | $2.69 \pm 0.00$ | 14.48                            |          |
|                                      | Pt-Mo | $1.35 \pm 0.15$ | $2.71 \pm 0.00$ |                                  |          |
| Pt/Mo <sub>x</sub> C-C<br>at 423 K   | Pt-O  | $0.78 \pm 0.06$ | $1.95 \pm 0.01$ | 0.23                             | 0.002    |
|                                      | Pt-Pt | $8.01 \pm 0.30$ | $2.70 \pm 0.00$ | 13.42                            |          |
|                                      | Pt-Mo | $1.32 \pm 0.20$ | $2.72 \pm 0.00$ |                                  |          |

Structural parameters extracted from the EXAFS fitting of reference metal foil. CN is the coordination number; R is the interatomic distance;  $\sigma^2$  is the Debye-Waller factor (a measure of the static and thermal disorder in absorber-scatterer distance);  $\Delta E_0$  is edge energy shift (the zero kinetic energy difference between experiment and theoretical model); R-factor value is related with the goodness of the fitting.

\* Value was assigned in curving fitting based on standard structure

R<sub>bkg</sub> was set to 1.0 in background removal to remove the noise oscillation below 1 Å in R-space

S<sub>0</sub><sup>2</sup> value was calculated from the fitting of metal foil with standard metal structure

**Table S7** Adsorbate binding energy for each support. DFT binding energies (eV) of \*H<sub>2</sub>O, and a pair of hydrogen + hydroxyl group (\*H + \*OH) on various supports.

|                           | DFT binding energy (eV) |          |
|---------------------------|-------------------------|----------|
|                           | *H <sub>2</sub> O       | *H + *OH |
| Graphene                  | 0.09                    | 2.93     |
| Pt (111)                  | 0.04                    | 1.04     |
| α-MoC (001)               | -0.35                   | -0.24    |
| β-Mo <sub>2</sub> C (101) | -0.29                   | -0.35    |

**Table S8** Noble metal loading of the various catalysts for electrochemical RDE experiments.

|                                                               | Pt/C  | aPt/Mo <sub>x</sub> C | Pt/Mo <sub>x</sub> C_Ar | Pt/Mo <sub>x</sub> C_H <sub>2</sub> | aRh/Mo <sub>x</sub> C | aNo/Mo <sub>x</sub> C |
|---------------------------------------------------------------|-------|-----------------------|-------------------------|-------------------------------------|-----------------------|-----------------------|
| Catalyst mass loading (mg cm <sup>-2</sup> )                  | 0.210 | 0.600                 | 0.600                   | 0.600                               | 0.600                 | 0.600                 |
| Noble metal mass loading (μg <sub>NM</sub> cm <sup>-2</sup> ) | 42.00 | 31.26                 | 43.38                   | 21.42                               | 16.32                 | -                     |
| Noble metal molar loading (μmol cm <sup>-2</sup> )            | 0.215 | 0.160                 | 0.222                   | 0.110                               | 0.159                 |                       |

**Table S9** Charge transfer resistance for each catalyst. Charge transfer resistance ( $R_{ct}$ ) calculated with EIS measurement at – 40 mV (vs. RHE) under acidic and alkaline condition at -40 mV (vs. RHE)

|                                                              | Catalysts |                       |                       |                                     |                         |                       |
|--------------------------------------------------------------|-----------|-----------------------|-----------------------|-------------------------------------|-------------------------|-----------------------|
|                                                              | Pt/C      | aPt/Mo <sub>x</sub> C | aRh/Mo <sub>x</sub> C | Pt/Mo <sub>x</sub> C_H <sub>2</sub> | Pt/Mo <sub>x</sub> C_Ar | aNo/Mo <sub>x</sub> C |
| $R_{ct}$ ( $\Omega \cdot \text{cm}^2$ )<br>alkaline at 40 mV | 30.10     | 4.864                 | 7.251                 | 79.42                               | 8.05                    | 1125                  |
| $R_{ct}$ ( $\Omega \cdot \text{cm}^2$ )<br>acidic at 40 mV   | 0.8615    | 0.7258                | 5.309                 | 1.484                               | 0.7197                  | 1003                  |

**Table S10** Electrochemical performance for the alkaline HER. Electrochemical responses for the HER in H<sub>2</sub>-saturated 1 M KOH solution.

| Catalysts                                                | $\eta_{10}$<br>(mV) | Tafel slope (mV·dec <sup>-1</sup> ) | $J_0$ (mA·cm <sup>-2</sup> ) | $J_{at\ 40\ mV}$ (mA·cm <sup>-2</sup> ) |
|----------------------------------------------------------|---------------------|-------------------------------------|------------------------------|-----------------------------------------|
| Pt/C                                                     | 47                  | 81.0                                | 2.675                        | 7.802                                   |
| Pt/C<br>(31 $\mu\text{g}_{\text{Pt}}$ cm <sup>-2</sup> ) | 59                  | 86.1                                | 2.085                        | 5.012                                   |
| aPt/Mo <sub>x</sub> C                                    | 26                  | 41.8                                | 2.897                        | 26.061                                  |
| aRh/Mo <sub>x</sub> C                                    | 26                  | 44.3                                | 2.963                        | 23.373                                  |
| Pt/Mo <sub>x</sub> C_H <sub>2</sub>                      | 94                  | 102.8                               | 1.214                        | 2.835                                   |
| Pt/Mo <sub>x</sub> C_Ar                                  | 30                  | 47.6                                | 2.568                        | 17.876                                  |
| aNo/Mo <sub>x</sub> C                                    | 130                 | 60.7                                | -                            | -                                       |

  

| Catalysts                                                | $J_0$ per NM mol<br>(mA·cm <sup>-2</sup> · $\mu\text{mol}^{-1}$ ) | $J_0$ per NM mass<br>(mA·cm <sup>-2</sup> ·mg <sup>-1</sup> ) | $J_{at\ 40mV}$ per NM mol<br>(mA·cm <sup>-2</sup> · $\mu\text{mol}^{-1}$ ) | $J_{at\ 40mV}$ per NM mass<br>(mA·cm <sup>-2</sup> ·mg <sup>-1</sup> ) |
|----------------------------------------------------------|-------------------------------------------------------------------|---------------------------------------------------------------|----------------------------------------------------------------------------|------------------------------------------------------------------------|
| Pt/C                                                     | 12.425                                                            | 63.690                                                        | 36.238                                                                     | 185.762                                                                |
| Pt/C<br>(31 $\mu\text{g}_{\text{Pt}}$ cm <sup>-2</sup> ) | 13.121                                                            | 67.258                                                        | 31.540                                                                     | 161.677                                                                |
| aPt/Mo <sub>x</sub> C                                    | 18.079                                                            | 92.674                                                        | 162.635                                                                    | 833.685                                                                |
| aRh/Mo <sub>x</sub> C                                    | 18.684                                                            | 181.556                                                       | 147.385                                                                    | 1432.169                                                               |
| Pt/Mo <sub>x</sub> C_H <sub>2</sub>                      | 11.056                                                            | 56.676                                                        | 25.819                                                                     | 132.353                                                                |
| Pt/Mo <sub>x</sub> C_Ar                                  | 11.548                                                            | 59.198                                                        | 80.388                                                                     | 412.079                                                                |

**Table S11** Electrochemical performance in the alkaline HOR. Electrochemical responses for the HOR in H<sub>2</sub>-saturated 1 M KOH solution.

| Catalysts                                       | $j_{\text{at } 25 \text{ mV}}$<br>(mA·cm <sup>-2</sup> ) | $j_0$<br>(mA·cm <sup>-2</sup> ) | $j_k \text{ at } 25 \text{ mV}$<br>(mA·cm <sup>-2</sup> ) |
|-------------------------------------------------|----------------------------------------------------------|---------------------------------|-----------------------------------------------------------|
| Pt/C                                            | 1.289                                                    | 2.533                           | 5.227                                                     |
| Pt/C<br>(31 μg <sub>Pt</sub> cm <sup>-2</sup> ) | 1.160                                                    | 1.992                           | 3.980                                                     |
| aPt/Mo <sub>x</sub> C                           | 1.602                                                    | 3.431                           | 18.175                                                    |
| aRh/Mo <sub>x</sub> C                           | 1.646                                                    | 3.458                           | 21.653                                                    |
| Pt/Mo <sub>x</sub> C_H <sub>2</sub>             | 0.938                                                    | 1.366                           | 2.180                                                     |
| Pt/Mo <sub>x</sub> C_Ar                         | 1.509                                                    | 3.158                           | 11.630                                                    |

  

| Catalysts                                       | $j_{\text{at } 25 \text{ mV per NM mol}}$<br>(mA·cm <sup>-2</sup> ·μmol <sup>-1</sup> ) | $j_{\text{at } 25 \text{ mV per NM mass}}$<br>(mA·cm <sup>-2</sup> ·mg <sup>-1</sup> ) | $j_0 \text{ per NM mol}$<br>(mA·cm <sup>-2</sup> ·μmol <sup>-1</sup> ) | $j_0 \text{ per NM mass}$<br>(mA·cm <sup>-2</sup> ·mg <sup>-1</sup> ) | $j_k \text{ at } 25 \text{ mV, per NM mol}$<br>(mA·cm <sup>-2</sup> ·μmol <sup>-1</sup> ) | $j_k \text{ at } 25 \text{ mV, per NM mass}$<br>(mA·cm <sup>-2</sup> ·mg <sup>-1</sup> ) |
|-------------------------------------------------|-----------------------------------------------------------------------------------------|----------------------------------------------------------------------------------------|------------------------------------------------------------------------|-----------------------------------------------------------------------|-------------------------------------------------------------------------------------------|------------------------------------------------------------------------------------------|
| Pt/C                                            | 5.987                                                                                   | 30.690                                                                                 | 11.765                                                                 | 60.310                                                                | 24.278                                                                                    | 124.452                                                                                  |
| Pt/C<br>(31 μg <sub>Pt</sub> cm <sup>-2</sup> ) | 7.299                                                                                   | 37.414                                                                                 | 12.538                                                                 | 64.271                                                                | 25.043                                                                                    | 128.375                                                                                  |
| aPt/Mo <sub>x</sub> C                           | 9.997                                                                                   | 51.248                                                                                 | 21.411                                                                 | 109.757                                                               | 113.422                                                                                   | 581.414                                                                                  |
| aRh/Mo <sub>x</sub> C                           | 10.379                                                                                  | 100.858                                                                                | 21.805                                                                 | 211.887                                                               | 136.539                                                                                   | 1326.777                                                                                 |
| Pt/Mo <sub>x</sub> C_H <sub>2</sub>             | 8.543                                                                                   | 43.791                                                                                 | 12.441                                                                 | 63.772                                                                | 19.854                                                                                    | 101.774                                                                                  |
| Pt/Mo <sub>x</sub> C_Ar                         | 6.786                                                                                   | 34.786                                                                                 | 14.202                                                                 | 72.799                                                                | 52.300                                                                                    | 268.096                                                                                  |

**Table S12** Electrochemical performance in the alkaline HOR. Electrochemical responses for the HOR in H<sub>2</sub>-saturated 0.1 M KOH solution.

| Catalysts                                       | $j_{\text{at } 25 \text{ mV}}$<br>(mA·cm <sup>-2</sup> ) | $j_0$<br>(mA·cm <sup>-2</sup> ) | $j_k \text{ at } 25 \text{ mV}$<br>(mA·cm <sup>-2</sup> ) |
|-------------------------------------------------|----------------------------------------------------------|---------------------------------|-----------------------------------------------------------|
| aPt/Mo <sub>x</sub> C                           | 2.032                                                    | 3.611                           | 12.040                                                    |
| aRh/Mo <sub>x</sub> C                           | 1.692                                                    | 2.665                           | 5.552                                                     |
| Pt/C<br>(42 μg <sub>NM</sub> cm <sup>-2</sup> ) | 1.598                                                    | 2.438                           | 4.881                                                     |
| Pt/C<br>(31 μg <sub>NM</sub> cm <sup>-2</sup> ) | 1.386                                                    | 2.032                           | 3.418                                                     |

  

| Catalysts                                       | $j_{\text{at } 25 \text{ mV per NM mol}}$<br>(mA·cm <sup>-2</sup> ·μmol <sup>-1</sup> ) | $j_{\text{at } 25 \text{ mV per NM mass}}$<br>(mA·cm <sup>-2</sup> ·mg <sup>-1</sup> ) | $j_0 \text{ per NM mol}$<br>(mA·cm <sup>-2</sup> ·μmol <sup>-1</sup> ) | $j_0 \text{ per NM mass}$<br>(mA·cm <sup>-2</sup> ·mg <sup>-1</sup> ) | $j_k \text{ at } 25 \text{ mV, per NM mol}$<br>(mA·cm <sup>-2</sup> ·μmol <sup>-1</sup> ) | $j_k \text{ at } 25 \text{ mV, per NM mass}$<br>(mA·cm <sup>-2</sup> ·mg <sup>-1</sup> ) |
|-------------------------------------------------|-----------------------------------------------------------------------------------------|----------------------------------------------------------------------------------------|------------------------------------------------------------------------|-----------------------------------------------------------------------|-------------------------------------------------------------------------------------------|------------------------------------------------------------------------------------------|
| aPt/Mo <sub>x</sub> C                           | 12.681                                                                                  | 65.003                                                                                 | 22.537                                                                 | 115.528                                                               | 75.138                                                                                    | 385.163                                                                                  |
| aRh/Mo <sub>x</sub> C                           | 10.669                                                                                  | 103.677                                                                                | 16.806                                                                 | 163.309                                                               | 35.008                                                                                    | 340.183                                                                                  |
| Pt/C<br>(42 μg <sub>NM</sub> cm <sup>-2</sup> ) | 7.422                                                                                   | 38.048                                                                                 | 11.323                                                                 | 58.043                                                                | 22.672                                                                                    | 116.218                                                                                  |
| Pt/C<br>(31 μg <sub>NM</sub> cm <sup>-2</sup> ) | 8.722                                                                                   | 44.710                                                                                 | 12.790                                                                 | 65.561                                                                | 21.511                                                                                    | 110.265                                                                                  |

**Table S13** Electrochemical performances in alkaline HOR with the presence of CO poisoner. Electrochemical responses for HOR in the presence of CO (1,000 ppm CO/H<sub>2</sub>-saturated 1 M KOH solution).

| Catalysts                           | $j_{\text{at 25 mV}}$<br>(mA·cm <sup>-2</sup> ) | $j_0$<br>(mA·cm <sup>-2</sup> ) | $j_k$ at 25 mV<br>(mA·cm <sup>-2</sup> ) | $(j_{\text{H}_2} - j_{\text{H}_2/\text{CO}}) / j_{\text{H}_2}$ at 100 mV<br>(%) |
|-------------------------------------|-------------------------------------------------|---------------------------------|------------------------------------------|---------------------------------------------------------------------------------|
| Pt/C                                | 0.706                                           | 1.117                           | 1.274                                    | 29.8                                                                            |
| aPt/Mo <sub>x</sub> C               | 1.279                                           | 2.489                           | 5.565                                    | 14.0                                                                            |
| aRh/Mo <sub>x</sub> C               | 1.609                                           | 3.313                           | 16.749                                   | 1.6                                                                             |
| Pt/Mo <sub>x</sub> C-H <sub>2</sub> | 0.363                                           | 0.504                           | 0.506                                    | 47.8                                                                            |
| Pt/Mo <sub>x</sub> C-Ar             | 1.256                                           | 2.539                           | 4.453                                    | 15.3                                                                            |

  

| Catalysts                           | $j_{\text{at 25 mV per NM mol}}$<br>(mA·cm <sup>-2</sup> ·μmol <sup>-1</sup> ) | $j_{\text{at 25 mV per NM mass}}$<br>(mA·cm <sup>-2</sup> ·mg <sup>-1</sup> ) | $j_0$ per NM mol<br>(mA·cm <sup>-2</sup> ·μmol <sup>-1</sup> ) | $j_0$ per NM mass<br>(mA·cm <sup>-2</sup> ·mg <sup>-1</sup> ) | $j_k$ at 25 mV, per NM mol<br>(mA·cm <sup>-2</sup> ·μmol <sup>-1</sup> ) | $j_k$ at 25 mV, per NM mass<br>(mA·cm <sup>-2</sup> ·mg <sup>-1</sup> ) |
|-------------------------------------|--------------------------------------------------------------------------------|-------------------------------------------------------------------------------|----------------------------------------------------------------|---------------------------------------------------------------|--------------------------------------------------------------------------|-------------------------------------------------------------------------|
| Pt/C                                | 3.279                                                                          | 16.810                                                                        | 5.188                                                          | 26.595                                                        | 5.917                                                                    | 30.333                                                                  |
| aPt/Mo <sub>x</sub> C               | 7.981                                                                          | 40.915                                                                        | 15.533                                                         | 79.623                                                        | 34.729                                                                   | 178.023                                                                 |
| aRh/Mo <sub>x</sub> C               | 10.146                                                                         | 98.591                                                                        | 20.891                                                         | 203.003                                                       | 105.615                                                                  | 1026.287                                                                |
| Pt/Mo <sub>x</sub> C-H <sub>2</sub> | 3.306                                                                          | 16.947                                                                        | 4.590                                                          | 23.529                                                        | 4.608                                                                    | 23.623                                                                  |
| Pt/Mo <sub>x</sub> C-Ar             | 5.648                                                                          | 28.953                                                                        | 11.418                                                         | 58.529                                                        | 20.025                                                                   | 102.651                                                                 |

**Table S14** Lennard-Jones FF parameters optimized to simulate  $\alpha$ -MoC (100).<sup>29</sup>

| FF parameter                      | Value |
|-----------------------------------|-------|
| $\sigma$ (C-C) [ $\text{\AA}$ ]   | 2.2   |
| $\varepsilon$ (C-C) [eV]          | 0.095 |
| $\sigma$ (Mo-Mo) [ $\text{\AA}$ ] | 2.2   |
| $\varepsilon$ (Mo-Mo) [eV]        | 0.095 |
| $\sigma$ (Mo-C) [ $\text{\AA}$ ]  | 2.2   |
| $\varepsilon$ (Mo-C) [eV]         | 0.095 |

**Table S15** Atomic charges of Mo and C assigned for simulating  $\alpha$ -MoC (100).<sup>30</sup>

| Species | Charge value |
|---------|--------------|
| Mo      | 1.28         |
| C       | -1.28        |

**Table S16** Lennard-Jones FF parameters optimized to simulate Pt binding on  $\alpha$ -MoC (100) and that on graphene.<sup>31</sup>

| FF parameter                      | Value |
|-----------------------------------|-------|
| $\alpha$ -MoC ~ Pt                |       |
| $\sigma$ (Pt-C) [ $\text{\AA}$ ]  | 2.273 |
| $\epsilon$ (Pt-C) [eV]            | 0.820 |
| $\sigma$ (Pt-Mo) [ $\text{\AA}$ ] | 2.273 |
| $\epsilon$ (Pt-Mo) [eV]           | 0.820 |
| Graphite ~ Pt                     |       |
| $\sigma$ (Pt-C) [ $\text{\AA}$ ]  | 2.0   |
| $\epsilon$ (Pt-C) [eV]            | 0.300 |

**Table S17** Comparison of the synthesized catalysts with other state-of-the-art catalysts for AEMWEs (marked in yellow: the developed anion-exchange membrane (AEM) and anion-exchange ionomer (AEI) that were used; shaded area: studies that achieved the US DOE's 2026 performance target for PEMWEs ( $3.0 \text{ A cm}^{-2}$  @  $1.8 \text{ V}_{\text{cell}}$ )).

| Membrane electrode assembly (MEA) |                                                           |                      |                                                                             |                                                           | Current density<br>( $\text{A cm}^{-2}$ ) |         | Cell voltage<br>( $\text{V}_{\text{cell}}$ ) |                        | Reference                                          |
|-----------------------------------|-----------------------------------------------------------|----------------------|-----------------------------------------------------------------------------|-----------------------------------------------------------|-------------------------------------------|---------|----------------------------------------------|------------------------|----------------------------------------------------|
| Cathode                           | NM loading<br>( $\text{mg}_{\text{NM}} \text{ cm}^{-2}$ ) | Membrane             | Anode                                                                       | NM loading<br>( $\text{mg}_{\text{NM}} \text{ cm}^{-2}$ ) | @ 1.8 V                                   | @ 2.0 V | @ 1 $\text{A cm}^{-2}$                       | @ 2 $\text{A cm}^{-2}$ |                                                    |
| aPt/Mo <sub>x</sub> C             | 0.06                                                      | PiperION             | NiFe alloy                                                                  | -                                                         | 3.38                                      | 6.81    | 1.596                                        | 1.691                  | This work                                          |
| aRh/Mo <sub>x</sub> C             | 0.04                                                      |                      |                                                                             | -                                                         | 3.18                                      | 6.66    | 1.614                                        | 1.715                  |                                                    |
| aPt/Mo <sub>x</sub> C             | 0.02                                                      |                      |                                                                             | -                                                         | 2.53                                      | 5.60    | 1.642                                        | 1.754                  |                                                    |
| aRh/Mo <sub>x</sub> C             | 0.02                                                      |                      |                                                                             | -                                                         | 1.88                                      | 4.32    | 1.694                                        | 1.812                  |                                                    |
| Pt-Ni nanowires                   | 0.1                                                       | NREL Gen2            | Co NPs                                                                      | -                                                         | 0.73                                      | 1.36    | 1.888                                        | -                      | ACS Catal.,<br>10, 9953-9966<br>(2020)             |
| Pt/C<br>/MPL-CP                   | 0.4                                                       | FAA-3-50             | NiFeOOH                                                                     | -                                                         | 2.52                                      | 4.51    | 1.624                                        | 1.743                  | ACS Catal.,<br>12, 135-145<br>(2022)               |
| Pt/C<br>/CP                       | 1.0                                                       | FAA-3-50             | CoSb <sub>2</sub> O <sub>6</sub>                                            | -                                                         | 0.53                                      | -       | 1.978                                        | -                      | ACS Energy Lett.,<br>6, 364-370<br>(2021)          |
| Pt-Ni/C<br>/CP                    | 1.2                                                       | -                    | Fe <sub>10</sub> Ni <sub>45</sub> Co <sub>45</sub>                          | -                                                         | 0.37                                      | 0.75    | -                                            | -                      | Adv. Energy Mater.,<br>14, 2303350<br>(2024)       |
| Ru/P-MoB                          | 0.11                                                      | Sustainion<br>X37-50 | RuO <sub>2</sub>                                                            | 1                                                         | 1.22                                      | -       | 1.779                                        | -                      | Adv. Energy Mater.,<br>14, 2303384<br>(2024)       |
| Pt/C                              | 0.6                                                       | DURAION              | Ni <sub>3</sub> Fe LDH                                                      | -                                                         | 1.10                                      | 2.07    | 1.780                                        | 1.990                  | Adv. Funct. Mater.,<br>32, 2203520<br>(2022)       |
| Ru/Zn-N-C                         | 0.1                                                       | FAA-3-<br>PK-130     | NiFe-LDH                                                                    | -                                                         | 0.09                                      | 0.42    | -                                            | -                      | Adv. Mater.,<br>36, 2308798<br>(2024)              |
| Pt/C                              | 0.8                                                       | Sustainion<br>X37-50 | Nei-Ir <sub>1</sub> /CoGaO<br>OH                                            | 0.244                                                     | 0.46                                      | 0.61    | 2.110                                        | 2.700                  | Angew. Chem. Int. Ed.,<br>63, e202404418<br>(2024) |
| Pt/C                              | 1.0                                                       | Sustainion<br>X37-50 | CuCo-oxide                                                                  | -                                                         | 1.36                                      | -       | 1.745                                        | 1.875                  | Appl. Catal. B-Environ.,<br>278, 119276<br>(2020)  |
| Pt/C                              | 1.0                                                       | Sustainion<br>X37-50 | CoFeCe <sub>0.5</sub>                                                       | -                                                         | 2.15                                      | -       | 1.657                                        | 1.783                  | Appl. Catal. B-Environ.,<br>318, 121824<br>(2022)  |
| Pt/C                              | 1.0                                                       | Sustainion<br>X37-50 | Ni <sub>0.5</sub> Co <sub>0.5</sub> MoO <sub>4</sub> ·<br>nH <sub>2</sub> O | -                                                         | 0.95                                      | 1.85    | 1.810                                        | 2.034                  | Appl. Catal. B-Environ.,<br>328, 123504<br>(2023)  |
| aPt/pNi-NOMC                      | 0.5                                                       | Sustainion<br>X37-50 | Co <sub>3</sub> O <sub>4</sub>                                              | -                                                         | 0.62                                      | -       | 1.912                                        | -                      | Appl. Catal. B-Environ.,<br>343, 123568<br>(2024)  |
| Ru <sub>2</sub> P nanofiber       | 1.0                                                       | Sustainion<br>X37-   | IrO <sub>2</sub>                                                            | No mention                                                | 0.97                                      | 1.64    | 1.805                                        | 2.120                  | Chem. Eng. J.,<br>420, 130491<br>(2021)            |
| Pt/C                              | 0.6                                                       | PBPA AEM             | IrO <sub>2</sub>                                                            | 1.0                                                       | 2.00                                      | 4.00    | 1.691                                        | 1.800                  | Chem. Eng. J.,<br>467, 143442<br>(2023)            |
| Pt/C                              | 0.4                                                       | QPC-TMA              | IrO <sub>2</sub>                                                            | 2.0                                                       | 2.55                                      | 4.45    | 1.622                                        | 1.738                  | Energy Environ. Sci.,<br>13, 3633<br>(2020)        |
| Pt/C                              | 0.5                                                       | PFTP-13              | IrO <sub>2</sub>                                                            | 2.0                                                       | 3.89                                      | 7.68    | 1.602                                        | 1.679                  | Energy Environ. Sci.,<br>14, 6338<br>(2021)        |

| Membrane electrode assembly (MEA)  |                                                    |                   |                                                                  |                                                    | Current density<br>(A cm <sup>-2</sup> ) |         | Cell voltage<br>(V <sub>cell</sub> ) |                        | Reference                                |
|------------------------------------|----------------------------------------------------|-------------------|------------------------------------------------------------------|----------------------------------------------------|------------------------------------------|---------|--------------------------------------|------------------------|------------------------------------------|
| Cathode                            | NM loading<br>(mg <sub>NM</sub> cm <sup>-2</sup> ) | Membrane          | Anode                                                            | NM loading<br>(mg <sub>NM</sub> cm <sup>-2</sup> ) | @ 1.8 V                                  | @ 2.0 V | @ 1 A cm <sup>-2</sup>               | @ 2 A cm <sup>-2</sup> |                                          |
| aPt/Mo <sub>x</sub> C              | 0.06                                               | PiperION          | NiFe alloy                                                       | -                                                  | 3.38                                     | 6.81    | 1.596                                | 1.691                  | This work                                |
| aRh/Mo <sub>x</sub> C              | 0.04                                               |                   |                                                                  | -                                                  | 3.18                                     | 6.66    | 1.614                                | 1.715                  |                                          |
| Pt/C                               | 3.0                                                | Sustainion X37-50 | NiCoFe-NDA                                                       | -                                                  | 0.33                                     | 0.54    | -                                    | -                      | Energy Environ. Sci., 14, 6546 (2021)    |
| Pt/C                               | 1.0                                                | Sustainion X37-50 | La <sub>2</sub> NiO <sub>4</sub> @Ni-Fe                          | -                                                  | 0.45                                     | 0.80    | 2.100                                | -                      | Energy Environ. Sci., 16, 3331 (2023)    |
| Pt-MoAl <sub>1-x</sub> B/C         | 0.027                                              | Sustainion X37-50 | RuO <sub>2</sub>                                                 | 5.0                                                | 0.38                                     | 1.00    | 2.000                                | 2.356                  | Energy Environ. Sci., 16, 4093 (2023)    |
| PtRu/C                             | 0.5                                                | PDTP              | FeNiCo LDH /HPCC                                                 | -                                                  | 4.07                                     | 10.29   | 1.648                                | 1.708                  | Energy Environ. Sci., 16, 5019 (2023)    |
| NA-Ru <sub>3</sub> Ni/C            | 0.01344                                            | Sustainion X37-50 | NA-Ru <sub>3</sub> Ni/C                                          | 0.01344                                            | 0.47                                     | 0.90    | 2.048                                | 2.430                  | Energy Environ. Sci., 16, 285 (2023)     |
| Ru <sub>1</sub> -Mo <sub>2</sub> C | 0.013                                              | Sustainion X37-50 | NiFe LDH                                                         | -                                                  | 0.88                                     | 1.82    | 1.830                                | 2.030                  | Energy Environ. Sci., 17, 1397 (2024)    |
| Pt-AC/Cr-N-C                       | 0.05                                               | Sustainion X37-50 | NiFe LDH                                                         | -                                                  | 0.65                                     | 1.32    | 1.908                                | 2.177                  | J. Am. Chem. Soc., 145, 21432 (2023)     |
| Ir-Ni/MoS <sub>2</sub>             | 0.1                                                | Sustainion X37-50 | Ir-Ni/MoS <sub>2</sub>                                           | 0.1                                                | 1.10                                     | 2.10    | 1.777                                | 1.980                  | J. Colloid Interf. Sci., 628, 306 (2022) |
| Pt/C                               | 1.0                                                | Sustainion X37-50 | Cu-Co oxide                                                      | -                                                  | 1.30                                     | -       | 1.747                                | -                      | J. Mater. Chem. A, 8, 4290 (2020)        |
| PtRu/C                             | 1.5                                                | Sustainion X37-50 | W/FeNiOOH/C                                                      | -                                                  | 4.84                                     | 7.87    | 1.540                                | 1.615                  | Joule, 7, 1902 (2023)                    |
| Pt/C                               | 1.0                                                | Tokuyama A901     | CoFe <sub>0.25</sub> Al <sub>1.75</sub> O <sub>4</sub> /KB       | -                                                  | 0.63                                     | -       | 1.958                                | -                      | Nat. Catal., 2, 763 (2019)               |
| Pt/C                               | 0.1                                                | AF2HLF 8-25X      | Li <sub>2</sub> Mn <sub>1-x</sub> Ru <sub>x</sub> O <sub>3</sub> | 0.246                                              | 0.75                                     | 1.59    | 1.856                                | 2.118                  | Nat. Catal., 7, 546 (2024)               |
| Pt <sub>1</sub> /CoHPO/KB          | 0.0114                                             | Alklymer          | Pt <sub>1</sub> /CoHPO/KB                                        | 0.0171                                             | 0.99                                     | -       | 1.801                                | 1.930                  | Nat. Commun., 13, 3822 (2022)            |
| Cl-Pt/NiFe-LDH                     | 0.01                                               | Sustainion X37-50 | NiFe-LDN                                                         | -                                                  | 0.74                                     | 1.51    | 1.874                                | 2.103                  | Nat. Commun., 13, 6875 (2022)            |
| PtRu/C                             | 1.0                                                | MTCP-50           | NiFe                                                             | -                                                  | 5.40                                     | 9.21    | 1.510                                | 1.583                  | Nat. Commun., 14, 2732 (2023)            |
| Pt-Ru/RuO <sub>2</sub>             | 0.5                                                | AEMION            | NiFe-LDH                                                         | -                                                  | 0.49                                     | 1.61    | 1.900                                | 2.074                  | Nat. Commun., 15, 1447 (2024)            |
| PtRu/C                             | 3.0                                                | HTMA-DAPP         | NiFe                                                             | -                                                  | 5.12                                     | -       | 1.580                                | 1.639                  | Nat. Energy 5, 378 (2020)                |
| Ru SS /FeNiPi PHSS                 | 0.081                                              | Sustainion X37-50 | Ru SS /FeNiPi PHSS                                               | 0.081                                              | 2.09                                     | -       | 1.640                                | 1.780                  | Nat. Synth. 3, 576 (2023)                |

## Captions for Supplementary Movies

**Movie S1** 0.5 ns trajectory of 13 atoms of Pt cluster on  $\alpha$ -MoC (100) at 300 K.

**Movie S2** 0.5 ns trajectory of 13 atoms of Pt cluster on graphite at 300 K.

**Movie S3** 0.5 ns trajectory of 13 atoms of Pt cluster on  $\alpha$ -MoC (100) at 1,300 K.

**Movie S4** 0.5 ns trajectory of 13 atoms of Pt cluster on graphite at 1,300 K.

## Supplementary References

- 1 S. Hu and W.-X. Li, *Science*, 2021, **374**, 1360-1365.
- 2 S. Kim, J. Park, J. Hwang and J. Lee, *EnergyChem*, 2021, **3**, 100054.
- 3 T. W. Hansen, A. T. DeLaRiva, S. R. Challa and A. K. Datye, *Acc. Chem. Res.*, 2013, **46**, 1720-1730.
- 4 P. Buffat and J. P. Borel, *Phys. Rev. A*, 1976, **13**, 2287.
- 5 S. Kim, C. Choi, J. Hwang, J. Park, J. Jeong, H. Jun, S. Lee, S.-K. Kim, J. H. Jang and Y. Jung, *ACS Nano*, 2020, **14**, 4988-4999.
- 6 J. Jones, H. Xiong, A. T. DeLaRiva, E. J. Peterson, H. Pham, S. R. Challa, G. Qi, S. Oh, M. H. Wiebenga, X. I. Pereira Hernandez, Y. Wang and A. K. Datye, *Science*, 2016, **353**, 150-154.
- 7 Z. Zhuang, Y. Li, R. Yu, L. Xia, J. Yang, Z. Lang, J. Zhu, J. Huang, J. Wang, Y. Wang, L. Fan, J. Wu, Y. Zhao, D. Wang and Y. Li, *Nat. Catal.*, 2022, **5**, 300-310.
- 8 R. Sellin, J.-M. Clacens and C. Coutanceau, *Carbon*, 2010, **48**, 2244-2254.
- 9 K. A. Cychosz, R. Guillet-Nicolas, J. Garcia-Martinez and M. Thommes, *Chem. Soc. Rev.*, 2017, **46**, 389-414.
- 10 L. A. Solovyov, *Chem. Soc. Rev.*, 2013, **42**, 3708-3720.
- 11 K. T. Jung, W. B. Kim, C. H. Rhee and J. S. Lee, *Chem. Mater.*, 2004, **16**, 307-314.
- 12 A. Zitolo, V. Goellner, V. Armel, M.-T. Sougrati, T. Mineva, L. Stievano, E. Fonda and F. Jaouen, *Nat. Mater.*, 2015, **14**, 937-942.
- 13 P. Kuang, Y. Wang, B. Zhu, F. Xia, C. W. Tung, J. Wu, H. M. Chen and J. Yu, *Adv. Mater.*, 2021, **33**, e2008599.
- 14 Z. Zhang, J. Liu, J. Wang, Q. Wang, Y. Wang, K. Wang, Z. Wang, M. Gu, Z. Tang and J. Lim, *Nat. Commun.*, 2021, **12**, 5235.
- 15 P. J. Dietrich, R. J. Lobo-Lapidus, T. Wu, A. Sumer, M. C. Akatay, B. R. Fingland, N. Guo, J. A. Dumesic, C. L. Marshall and E. Stach, *Top. Catal.*, 2012, **55**, 53-69.
- 16 S. Alayoglu, P. Zavalij, B. Eichhorn, Q. Wang, A. I. Frenkel and P. Chupas, *ACS Nano*, 2009, **3**, 3127-3137.
- 17 H. Funke, A. Scheinost and M. Chukalina, *Phys. Rev. B*, 2005, **71**, 094110.
- 18 D. Koningsberger, J. Martens, R. Prins, D. Short and D. Sayers, *J. Phys. Chem.*, 1986, **90**, 3047-3050.
- 19 F. Duivenvoorden, D. Koningsberger, Y. Uh and B. Gates, *J. Am. Chem. Soc.*, 1986, **108**, 6254-6262.
- 20 S. Yang, J. Kim, Y. J. Tak, A. Soon and H. Lee, *Angew. Chem. Int. Ed.*, 2016, **55**, 2058-2062.
- 21 S. K. Sahoo, Y. Ye, S. Lee, J. Park, H. Lee, J. Lee and J. W. Han, *ACS Energy Lett.*, 2018, **4**, 126-132.
- 22 P. Rheinländer, S. Henning, J. Herranz and H. A. Gasteiger, *ECS Trans.*, 2013, **50**, 2163.
- 23 M. R. Hibbs, M. A. Hickner, T. M. Alam, S. K. McIntyre, C. H. Fujimoto and C. J. Cornelius, *Chem. Mater.*, 2008, **20**, 2566-2573.
- 24 W. E. Mustain, M. Chatenet, M. Page and Y. S. Kim, *Energy Environ. Sci.*, 2020, **13**, 2805-2838.
- 25 M. S. Cha, J. E. Park, S. Kim, S.-H. Han, S.-H. Shin, S. H. Yang, T.-H. Kim, D. M. Yu, S. So and Y. T. Hong, *Energy Environ. Sci.*, 2020, **13**, 3633-3645.
- 26 J. Hyun and H.-T. Kim, *Energy Environ. Sci.*, 2023, **16**, 5633-5662.
- 27 J. Xu and J. T. Yates Jr, *J. Chem. Phys.*, 1993, **99**, 725-732.
- 28 R. Subbaraman, D. Tripkovic, K. C. Chang, D. Strmcnik, A. P. Paulikas, P. Hirunsit, M. Chan, J. Greeley, V. Stamenkovic and N. M. Markovic, *Nat. Mater.*, 2012, **11**, 550-557.
- 29 A. F. Guillermet, J. Häglund and G. Grimvall, *Phys. Rev. B*, 1992, **45**, 11557.
- 30 G. Henkelman, A. Arnaldsson and H. Jónsson, *Comput. Mater. Sci.*, 2006, **36**, 354-360.
- 31 J.-L. Tsai and J.-F. Tu, *Mater. Des.*, 2010, **31**, 194-199.
